# Supplementary material
Source: PubMed Central journal article supplement (PMC7966676)
Supplement: mmc1.pdf [file mmc1.pdf]

**Med, Volume 2**

**Supplemental information**

**A booster dose enhances  
immunogenicity of the COVID-19 vaccine  
candidate ChAdOx1 nCoV-19 in aged mice**

**Alyssa Silva-Cayetano, William S. Foster, Silvia Innocentin, Sandra Belij-Rammerstorfer, Alexandra J. Spencer, Oliver T. Burton, Sigrid Fra-Bidó, Jia Le Lee, Nazia Thakur, Carina Conceicao, Daniel Wright, Jordan Barrett, Nicola Evans-Bailey, Carly Noble, Dalan Bailey, Adrian Liston, Sarah C. Gilbert, Teresa Lambe, and Michelle A. Linterman**

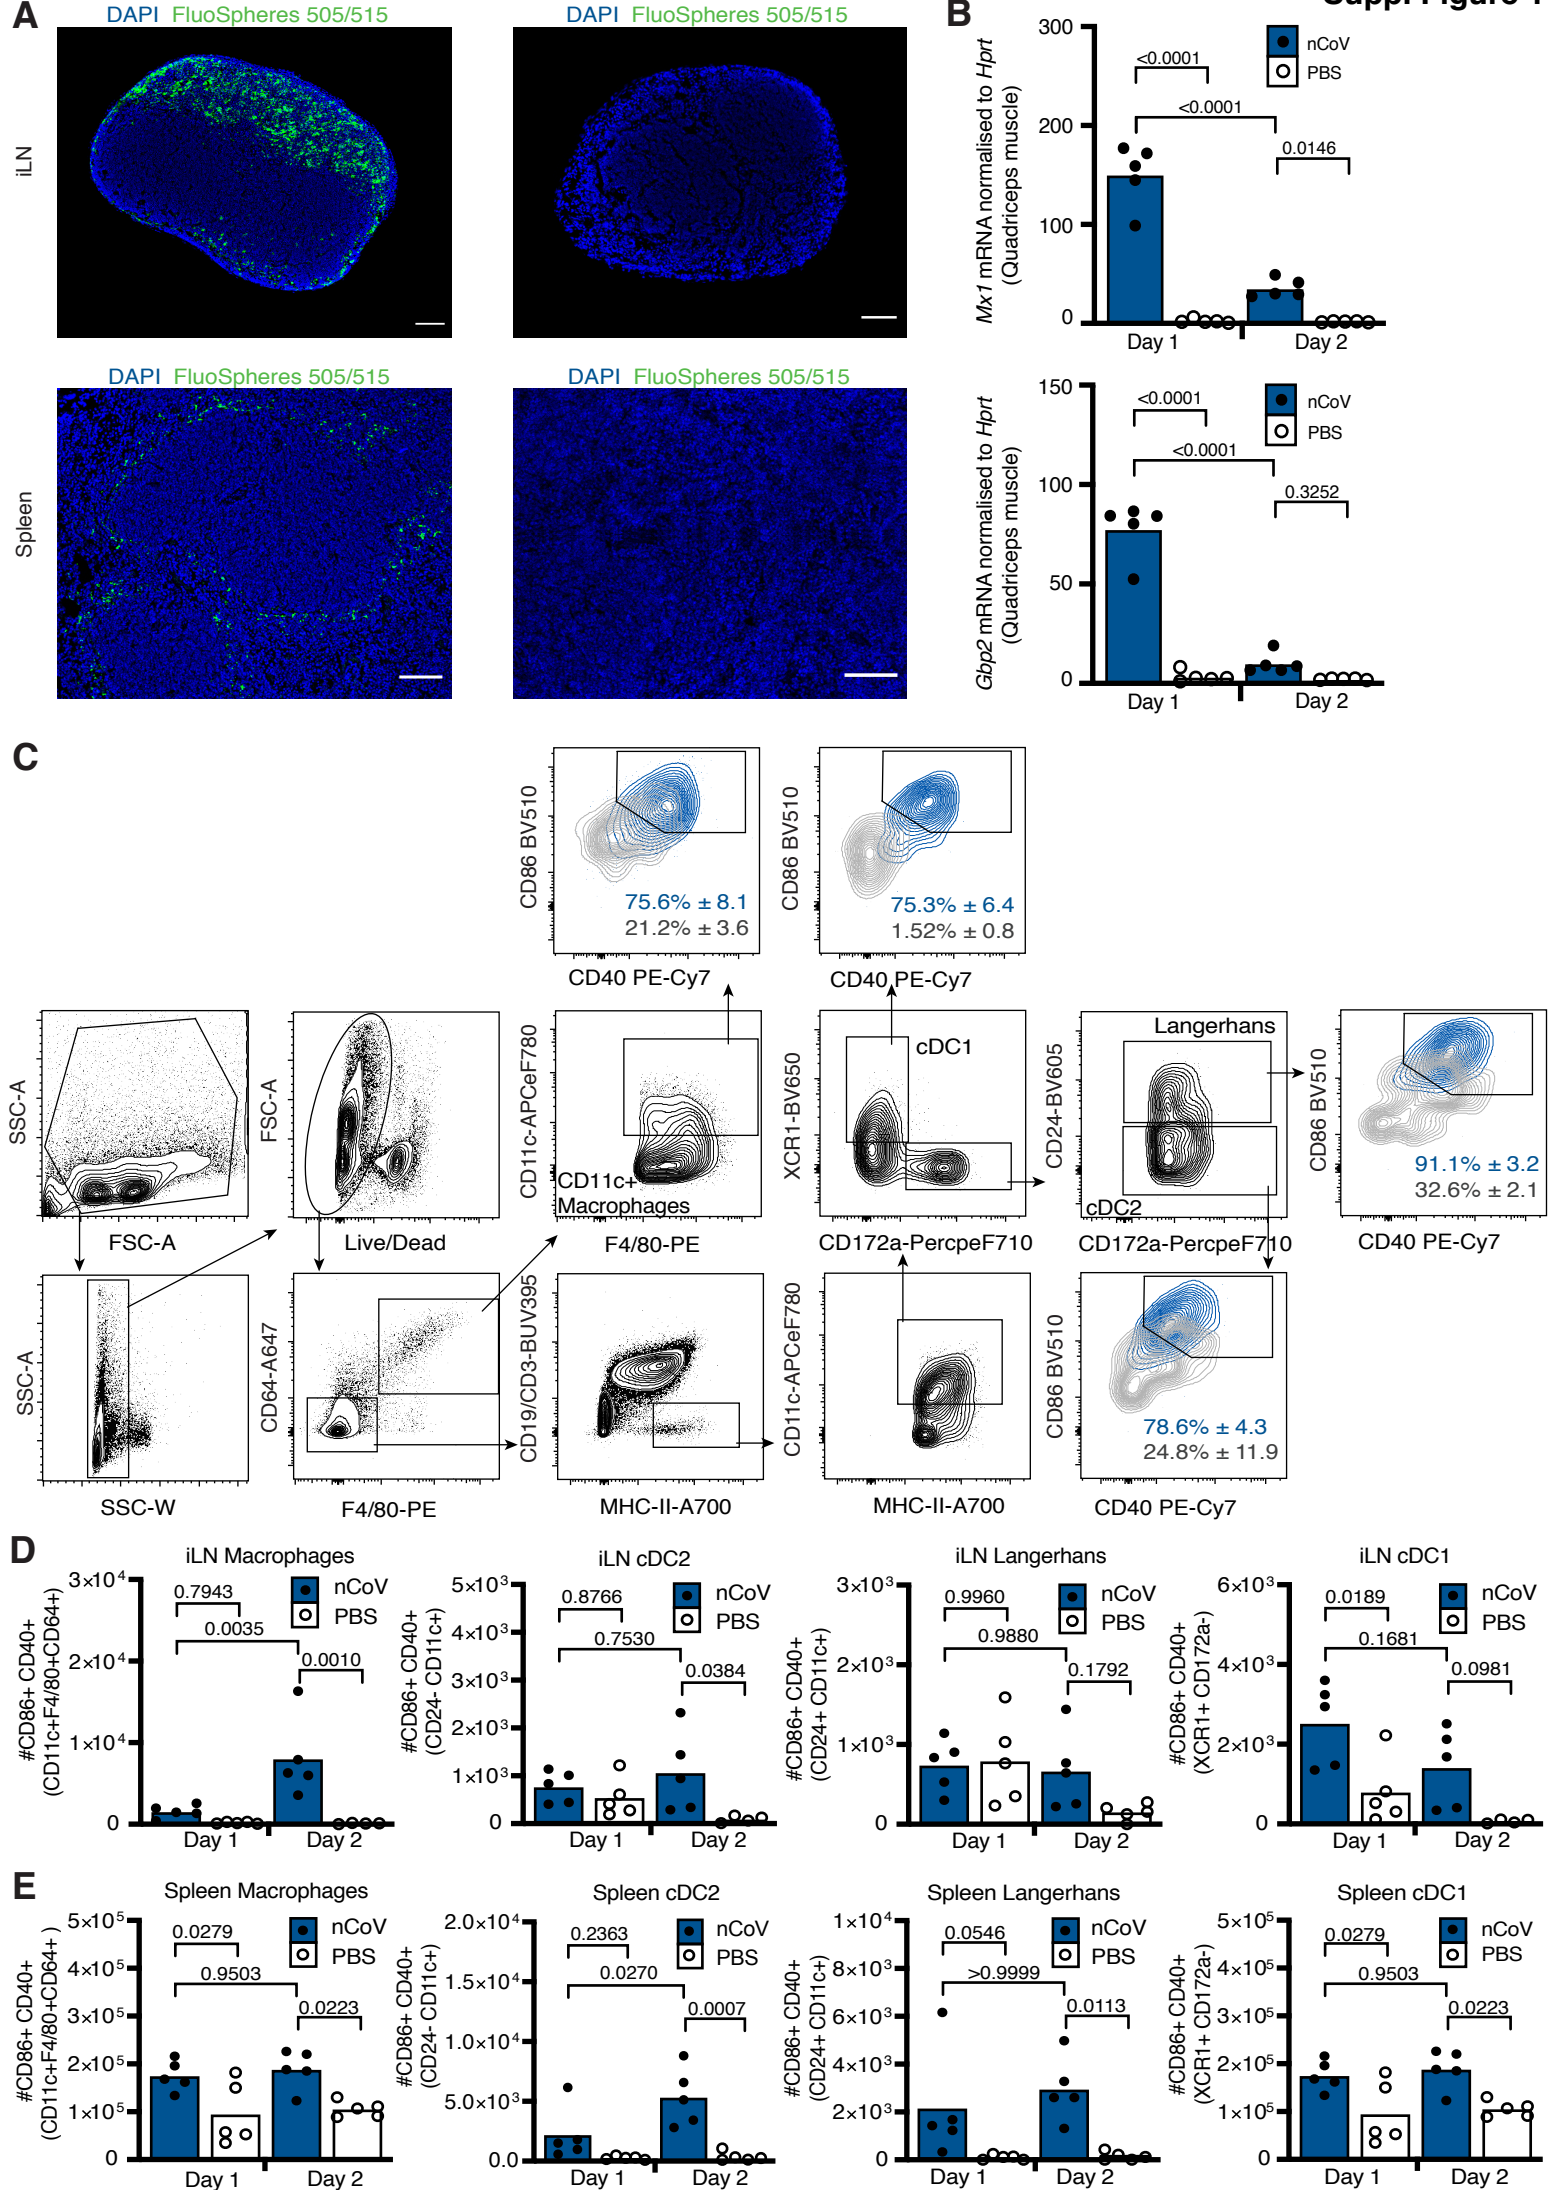

**Supplementary Figure 1. Intramuscular immunisation results in the activation of antigen presenting cells in the iLN and spleen upon immunisation with ChAdOx1 nCoV-19.** Related to figures 1-3. **A.** Representative immunofluorescence confocal images of DAPI expression and FluoSpheres™ (505/515) localisation in the iLN (top) and spleen (bottom) of mice immunised with yellow-green 20nm fluorescent FluoSpheres™ (left) or PBS (right) at 24hr post intramuscular immunisation. Scale bars, 100µM for both iLN and spleen. Data are representative of two independent experiments (n=2-5 per group/experiment). **B.** Expression of *Mx1* (top) and *Gbp2* (bottom) in the quadriceps muscle of mice immunised with ChAdOx1 nCoV or PBS at one- and two-days post immunisation, as determined by RT-qPCR. **c.** Gating strategy used for the identification of antigen presenting cell (APC) populations in the iLN and spleen of mice immunised with ChAdOx1 nCoV-19 or PBS at one- and two-days post immunisation. Macrophages were defined as CD11c<sup>+</sup>F4/80<sup>+</sup>CD64<sup>+</sup> cells. cDC1s were defined as XCR1<sup>+</sup>CD172a<sup>-</sup>CD11c<sup>+</sup>MHC-II<sup>+</sup>CD3/CD19<sup>-</sup>CD64<sup>-</sup>F4/80<sup>-</sup> cells. cDC2s CD24<sup>-</sup>CD172a<sup>+</sup>XCR1<sup>-</sup>CD11c<sup>+</sup>MHC-II<sup>+</sup>CD3/CD19<sup>-</sup>CD64<sup>-</sup>F4/80<sup>-</sup> cells. Langerhans cells were defined as CD24<sup>+</sup>CD11c<sup>+</sup>CD172a<sup>+</sup>XCR1<sup>-</sup>CD11c<sup>+</sup>MHC-II<sup>+</sup>CD3/CD19<sup>-</sup>CD64<sup>-</sup>F4/80<sup>-</sup> cells. Activated cells within each of these populations were identified as CD86<sup>+</sup>CD40<sup>+</sup>. These flow cytometry plots are representative of cells in the iLN of mice immunised with ChAdOx1 nCoV-19 (blue) or PBS (grey) at two-days post immunization, and indicate the median as a percentage as well as the standard deviation. **D-E.** Quantification of the absolute number of CD86<sup>+</sup>CD40<sup>+</sup> cells for each APC population in the iLN (**D**) and in the spleen (**E**). Bar height in **D-E** corresponds to the mean and each circle represents one biological replicate. P-values were determined using a Shapiro-Wilk normality test followed by either an ordinary one-way ANOVA test for data with a normal distribution or a Kruskal Wallis test for non-normally distributed data alongside a multiple comparisons test. Data are representative of two independent experiments (n=4-5 per group/experiment).

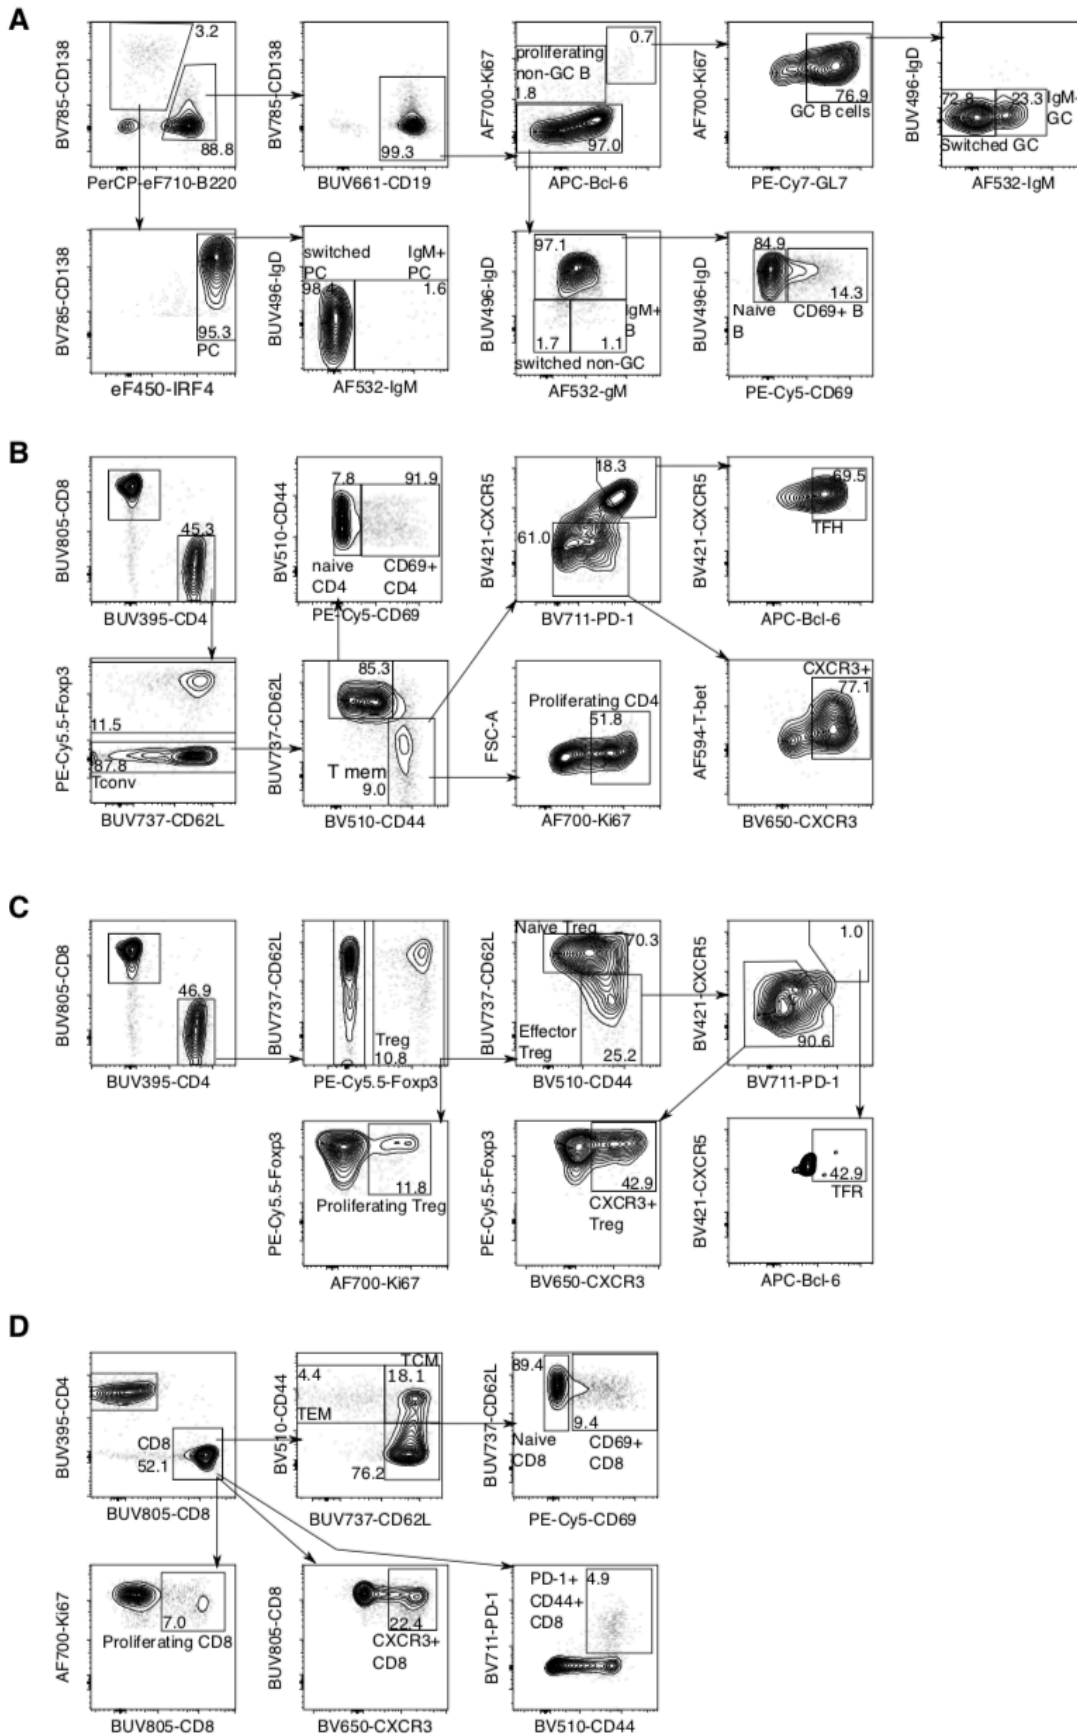

**Supplementary Figure 2. Gating strategy for ex vivo lymphocyte analyses.** Related to figures 1-3. Representative flow cytometric contour plots showing the gating strategy for B cell subsets (**A**), CD4<sup>+</sup>Foxp3<sup>-</sup> T cell subsets (**B**), Treg cell subsets (**C**) and CD8 cell subsets (**D**). Samples are taken from an iliac lymph node seven days after ChAdOx1 nCoV-19 immunisation.

**A Gating strategy**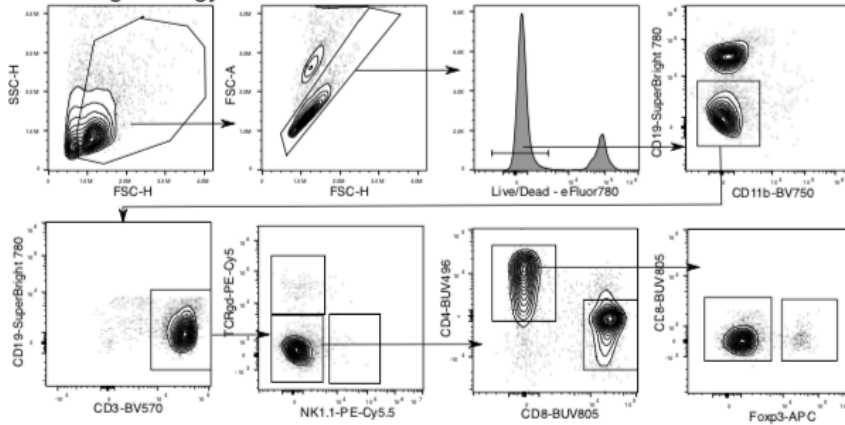**B PdBu stimulated aortic lymph node cells**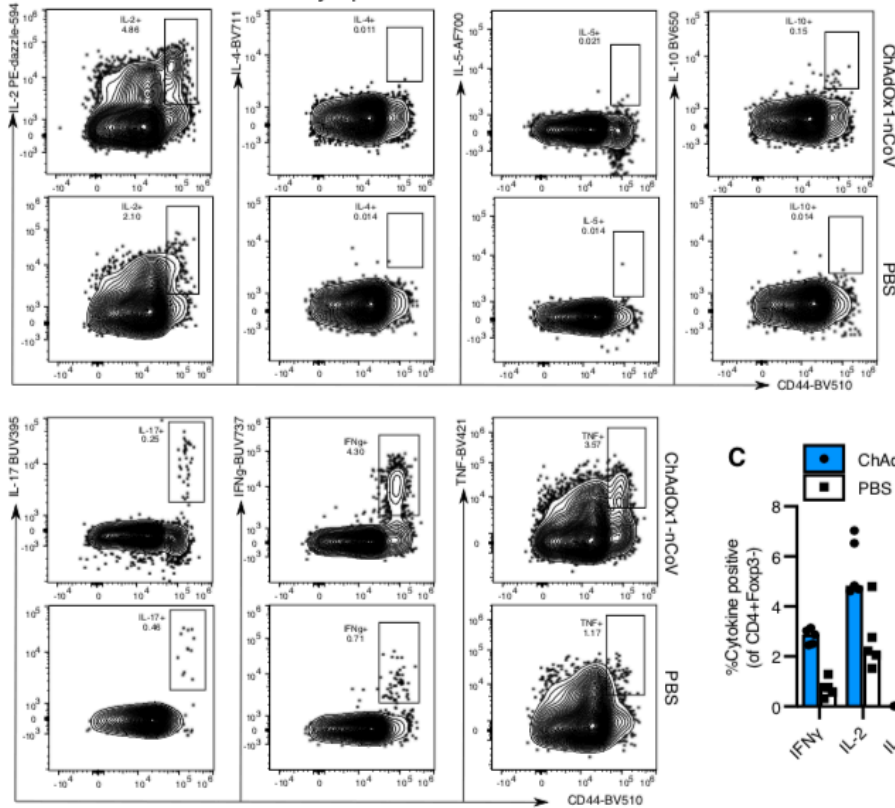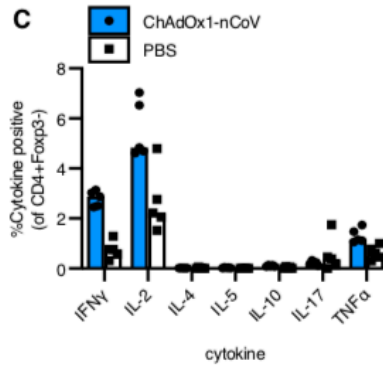**D Spike peptide stimulated splenocytes**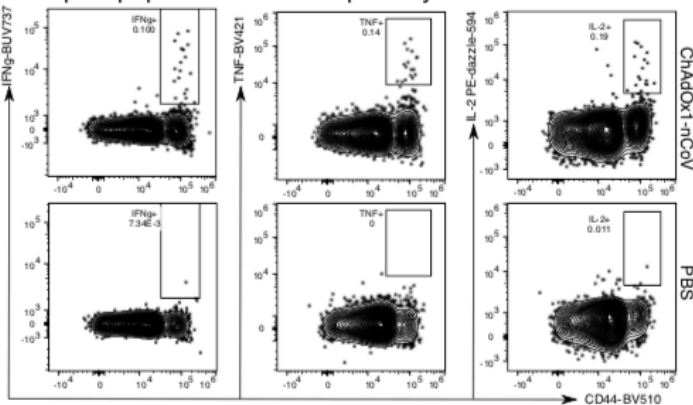

**Supplementary Figure 3. Gating strategy CD4 T cell cytokine staining.** Related to figures 2 and 5. Flow cytometric contour plots showing the gating strategy to identify T cell subsets (A), cytokine production in CD4<sup>+</sup>Foxp3<sup>-</sup> iliac lymph node T cells six hours after PdBu/Ionomycin restimulation (B, C), and in SARS-CoV-2 peptide restimulated CD4<sup>+</sup>Foxp3<sup>-</sup> splenocytes (D).

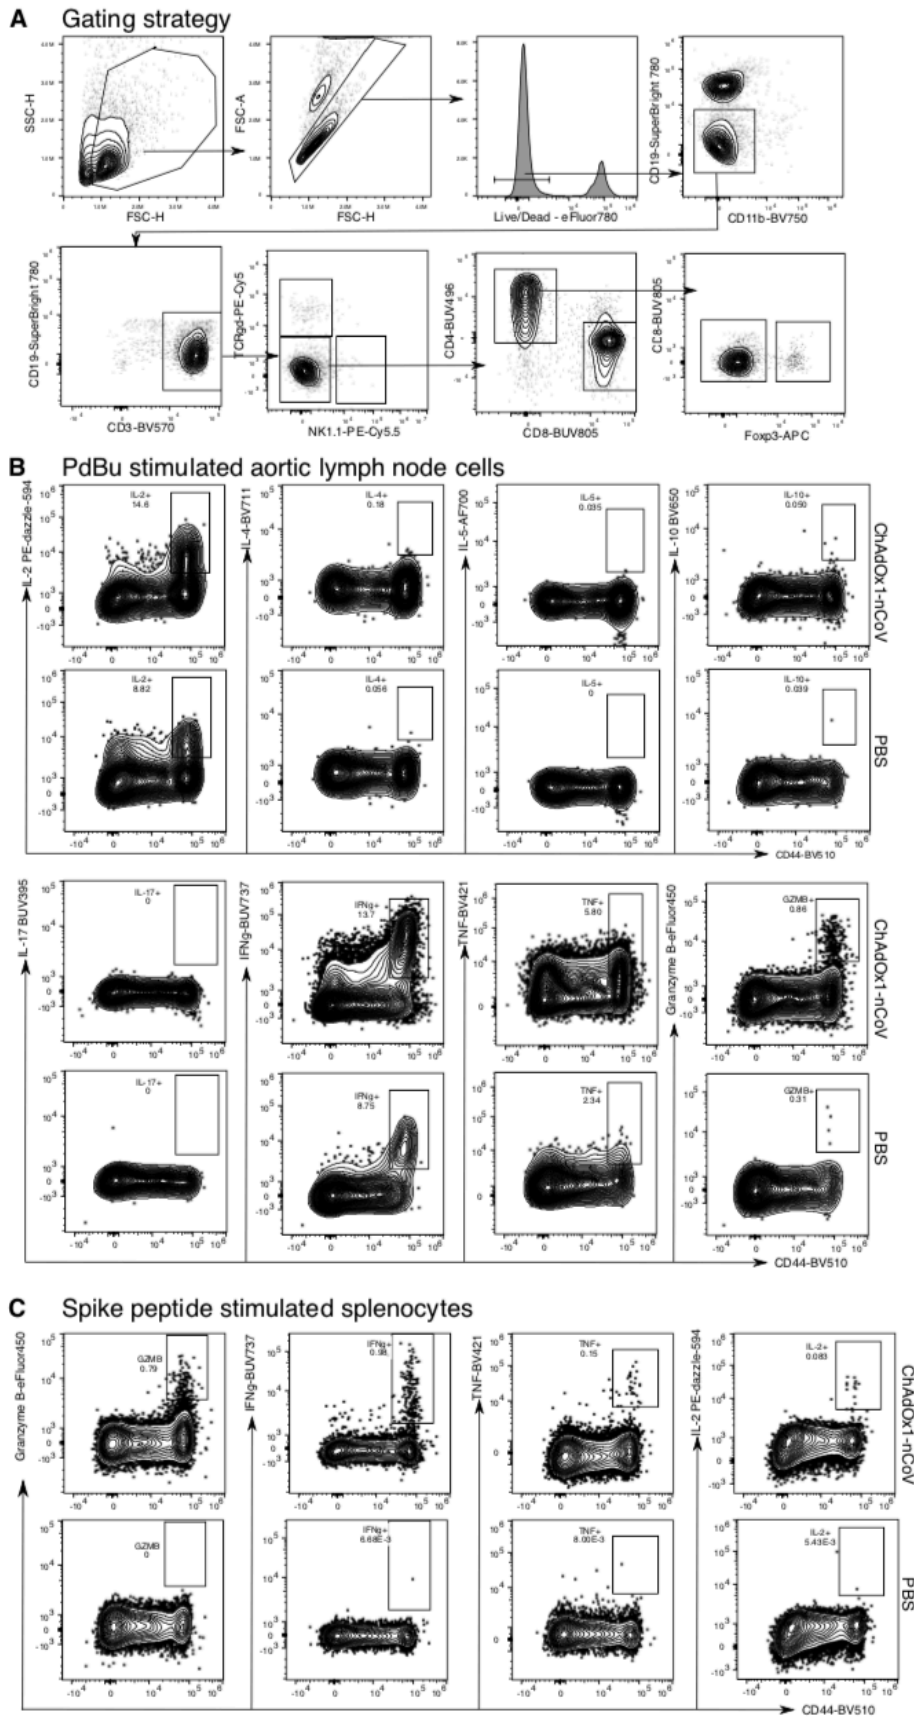

**Supplementary Figure 4. Gating strategy CD8 T cell cytokine and granzyme B staining.** Related to figures 3 and 4. Flow cytometric contour plots showing the gating strategy to identify T cell subsets (A), cytokine and granzyme B production in CD8<sup>+</sup> iliac lymph node T cells six hours after PdBu/Ionomycin restimulation (B), and in SARS-CoV-2 peptide restimulated CD8<sup>+</sup> splenocytes (C).

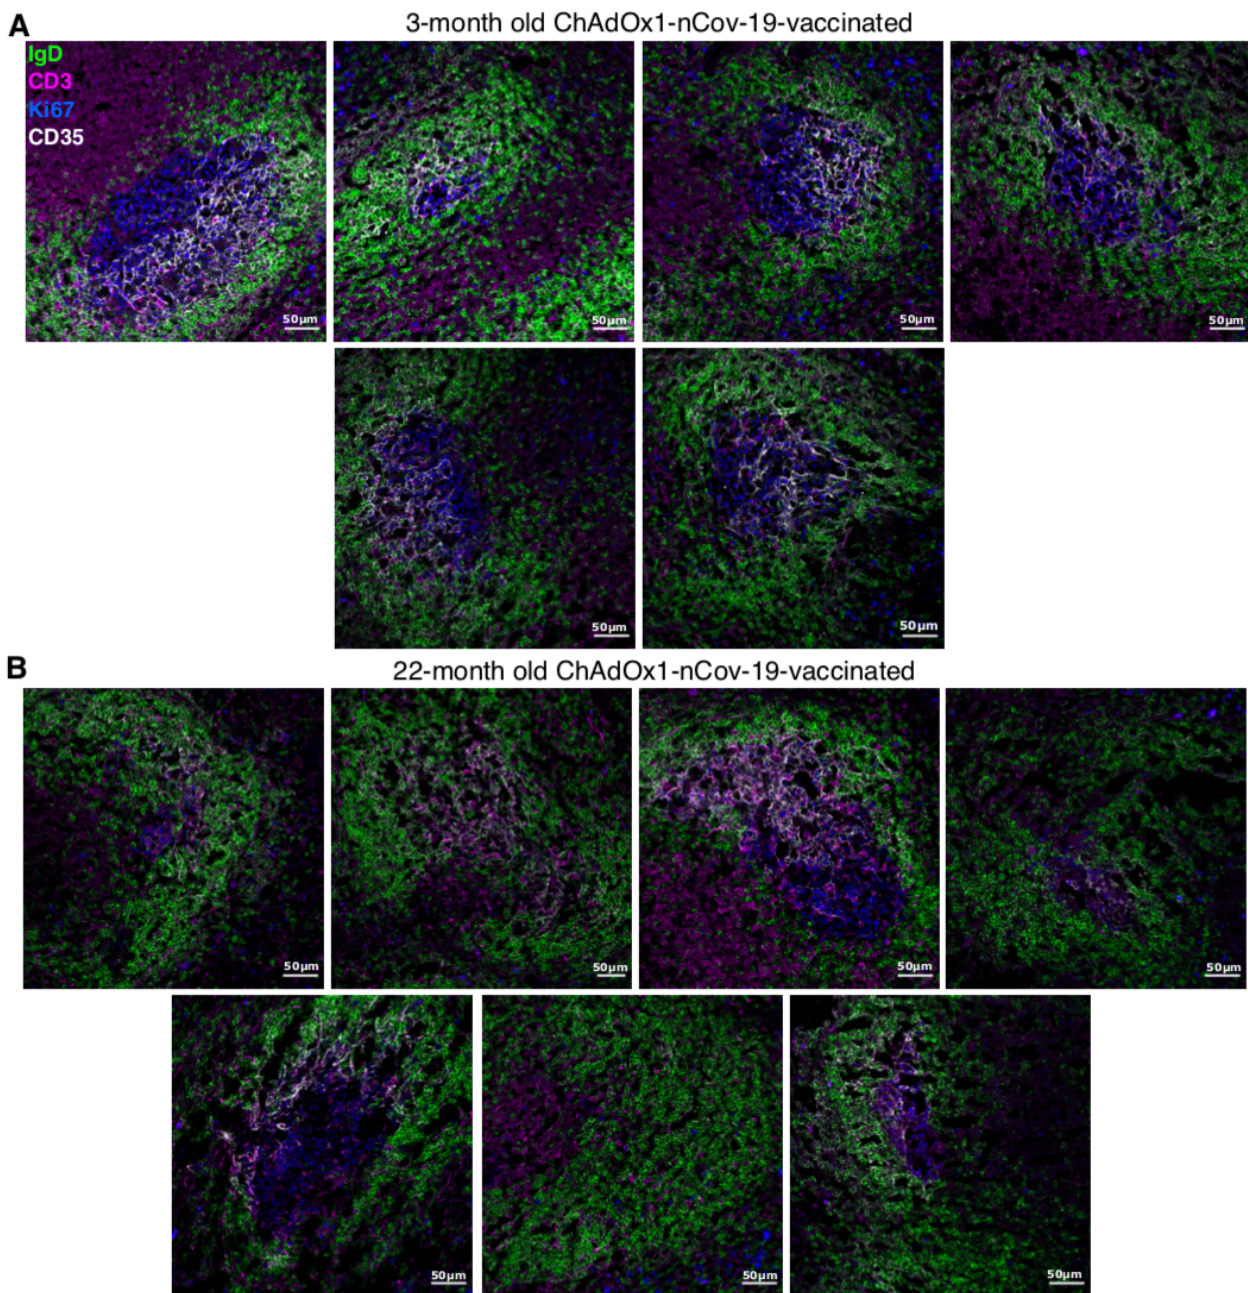

**Supplementary Figure 5. Germinal centre images nine days after ChAdOx1 nCoV-19 immunisation in adult and aged mice.** Related to figure 6.

Confocal images of the spleen of ChAdOx1 nCoV-19 immunised 3-month-old (**A**) and 22-month-old (**B**) mice. 10  $\mu$ m spleen sections were stained with anti-IgD (green), anti-CD3 (pink), anti-Ki67 (blue) and anti-CD35 (white) antibodies. Each image is from a different mouse. The scale bars indicate 50 $\mu$ m.

## **Supplementary methods**

Related to star methods and supplementary figure 1.

### ***Flow cytometry of dendritic cells***

For dendritic cell analysis, secondary lymphoid tissues were harvested and incubated with 10 mg/ml Collagenase D (Roche #11088866001) in plain Roswell Park Memorial Institute (RPMI) (Gibco #11875093) for 30-45 min at 37 °C, followed by gentle pipetting to disrupt the tissue. Cells were washed with PBS containing 2% FBS, before cell numbers were determined using a CASY® TT Cell Counter (Roche).  $4 \times 10^6$  cells were transferred to 96-well plates for antibody staining. After a wash with PBS, cells were stained with Live/Dead Fixable Blue Dead Cell Stain (Invitrogen #L23105; diluted 1:1000 in PBS) on ice for 10min after which they were washed in 2% FBS in PBS and treated with unlabelled anti-CD16/32 (eBioscience #14-0161-82; diluted 1:100 in 2% FBS in PBS) for 20min at 4°C. Surface antibody staining was then performed for 1hr at 4°C in Brilliant Stain Buffer (BD Biosciences #563794). Samples were acquired on an LSRFortessa 5 with stained UltraComp eBeads Compensation Beads (Invitrogen #01-2222-41) as compensation controls.

### ***RNA isolation and quantitative Real-Time PCR***

The right quadriceps muscle was dissected and weighed. The muscle tissue was snap frozen in liquid nitrogen and homogenized in 2mL TRIzol reagent (Thermo Fisher Scientific #15596026), then 1 mL of the homogenized muscle in TRIzol was processed following the manufacturer's instructions. RNA concentrations obtained from the RNA isolation were measured using the NanoDrop system (Thermo Fisher Scientific). Real time quantitative polymerase chain reaction (RT-qPCR) was performed using TaqMan Gene Expression Assays for *Mx1* (Mm 00487796\_m1), *Gbp2* (Mm 00494576\_g1) and *Hprt* (Mm 03024075\_m1) directly on RNA using Thermo Fisher Scientific's TaqMan RNA-to-CT 1-Step Kit (#4392656) following the manufacturer's protocol. All RT-qPCR reactions were assembled in 384-well plates (Bio-Rad #HSP3805), adding 10ng of template RNA per reaction to 8µl of a master mix containing the appropriate TaqMan Gene Expression Assay. All samples were run in triplicates on a BioRad CFX384 Real-Time System. The  $2^{-\Delta\Delta Ct}$ -method was applied for relative quantification of mRNA levels. Samples from PBS immunised mice were used as calibrators. Cq values were exported from the CFX Manager software (Bio-rad).
