# Supplementary material
Source: PubMed Central journal article supplement (PMC7966676)
Supplement: mmc2.pdf [file mmc2.pdf]

## Clinical and Translational Article

## A booster dose enhances immunogenicity of the COVID-19 vaccine candidate ChAdOx1 nCoV-19 in aged mice

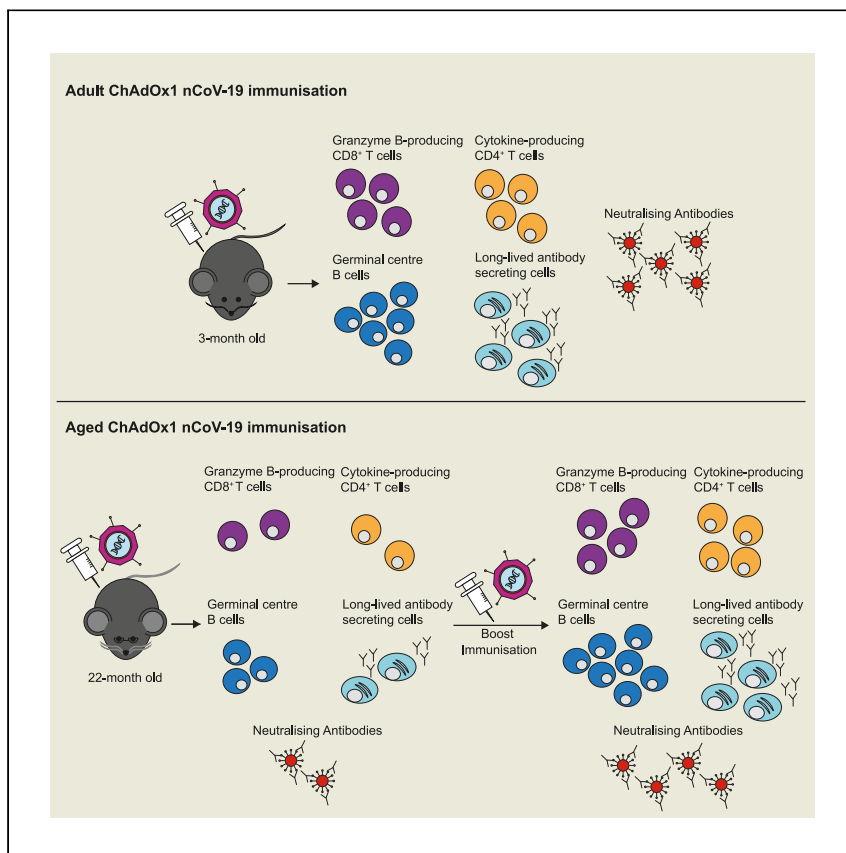

Alyssa Silva-Cayetano, William S. Foster, Silvia Innocentin, ..., Sarah C. Gilbert, Teresa Lambe, Michelle A. Linterman

teresa.lambe@ndm.ox.ac.uk (T.L.)  
michelle.linterman@babraham.ac.uk (M.A.L.)

**HIGHLIGHTS**

ChAdOx1 nCoV-19 induces spike-specific polyfunctional CD8<sup>+</sup> and CD4<sup>+</sup> T cells

ChAdOx1 nCoV-19 stimulates extrafollicular plasma cell and germinal center formation

A single dose of ChAdOx1 nCoV-19 induces cellular and humoral immunity in aged mice

A booster dose of ChAdOx1 nCoV-19 enhances immunogenicity in aged mice

Older persons are more likely to have poor health outcomes after SARS-CoV-2 infection; therefore, they are most in need of effective COVID-19 vaccines. Silva-Cayetano et al. show that a prime-boost strategy of the COVID-19 vaccine ChAdOx1 nCoV-19 enhances immunogenicity in aged mice, suggesting this as a strategy for immunizing older people.

## Clinical and Translational Article

## A booster dose enhances immunogenicity of the COVID-19 vaccine candidate ChAdOx1 nCoV-19 in aged mice

Alyssa Silva-Cayetano,<sup>1,5</sup> William S. Foster,<sup>1,5</sup> Silvia Innocentin,<sup>1,5</sup> Sandra Belij-Rammerstorfer,<sup>2,6</sup> Alexandra J. Spencer,<sup>2,6</sup> Oliver T. Burton,<sup>1</sup> Sigrid Fra-Bidó,<sup>1</sup> Jia Le Lee,<sup>1</sup> Nazia Thakur,<sup>4</sup> Carina Conceicao,<sup>4</sup> Daniel Wright,<sup>2</sup> Jordan Barrett,<sup>2</sup> Nicola Evans-Bailey,<sup>3</sup> Carly Noble,<sup>3</sup> Dalan Bailey,<sup>4</sup> Adrian Liston,<sup>1</sup> Sarah C. Gilbert,<sup>2</sup> Teresa Lambe,<sup>2,7,\*</sup> and Michelle A. Linterman<sup>1,7,8,\*</sup>

## SUMMARY

**Background:** The spread of SARS-CoV-2 has caused a worldwide pandemic that has affected almost every aspect of human life. The development of an effective COVID-19 vaccine could limit the morbidity and mortality caused by infection and may enable the relaxation of social-distancing measures. Age is one of the most significant risk factors for poor health outcomes after SARS-CoV-2 infection; therefore, it is desirable that any new vaccine candidates elicit a robust immune response in older adults.

**Methods:** Here, we use in-depth immunophenotyping to characterize the innate and adaptive immune response induced upon intramuscular administration of the adenoviral vectored ChAdOx1 nCoV-19 (AZD-1222) COVID-19 vaccine candidate in mice.

**Findings:** A single vaccination generates spike-specific Th1 cells, Th1-like Foxp3<sup>+</sup> regulatory T cells, polyfunctional spike-specific CD8<sup>+</sup> T cells, and granzyme-B-producing CD8 effectors. Spike-specific IgG and IgM are generated from both the early extrafollicular antibody response and the T follicular helper cell-supported germinal center reaction, which is associated with the production of virus-neutralizing antibodies. A single dose of this vaccine generated a similar type of immune response in aged mice but of a reduced magnitude than in younger mice. We report that a second dose enhances the immune response to this vaccine in aged mice.

**Conclusions:** This study shows that ChAdOx1 nCoV-19 induces both cellular and humoral immunity in adult and aged mice and suggests a prime-boost strategy is a rational approach to enhance immunogenicity in older persons.

**Funding:** This study was supported by BBSRC, Lister Institute of Preventative Medicine, EPSRC VaxHub, and Innovate UK.

## INTRODUCTION

The current Coronavirus Disease 2019 (COVID-19) pandemic is caused by the zoonotic severe acute respiratory syndrome coronavirus-2 (SARS-CoV-2).<sup>1,2</sup> The pandemic has affected almost every aspect of human life and will continue to do so until effective vaccines or therapeutics are developed. SARS-CoV-2 infection is initiated when the trimeric “spike” glycoprotein on the virion surface binds angiotensin-converting enzyme 2, allowing viral entry and initiating viral replication.<sup>3</sup> After

## Context and significance

Effective COVID-19 vaccines will play a central role in the exit strategy from the worldwide pandemic. However, older persons often do not generate protective immunity upon vaccination due to age-dependent changes in their immune system. Because older people are more likely to have poor clinical outcomes after SARS-CoV-2 infection, vaccine strategies that elicit an optimal immune response in older bodies are urgently required.

Researchers from the Babraham Institute, the Jenner Institute, and the Pirbright Institute in the UK performed pre-clinical testing of the COVID-19 vaccine candidate ChAdOx1 nCoV-19 in aged mice to assess how aging influences the immune response to this vaccine. The results show that a “prime-boost” vaccine regime enhances immunogenicity in aged mice, indicating that this approach is a rational strategy for vaccinating older persons.

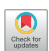

an asymptomatic incubation period, the infection can cause highly heterogeneous clinical outcomes, from negligible or mild symptoms to critical disease resulting in death.<sup>4</sup> One of the main risk factors for severe disease and death is age.<sup>4–6</sup> Therefore, development of a successful COVID-19 vaccine should aim to be effective in older adults.<sup>7,8</sup> However, age-related changes in the immune system mean that older individuals often do not generate protective immunity after vaccination.<sup>9–12</sup>

The effectiveness of COVID-19 vaccine candidates in older adults will ultimately be determined in clinical trials. Yet, pre-clinical studies in aged animals can be used to test alternative vaccine strategies or dosing regimens and can be used to inform clinical strategy. Despite aging occurring on different timescales in mice and people, many of the cellular and molecular changes that occur are conserved between the species.<sup>13,14</sup> The response to vaccination is no exception<sup>15,16</sup>; after vaccination, both aged mice (>20 months old) and older humans have reduced vaccine-specific antibody formation, an impaired type I interferon (IFN) response and fewer T follicular helper cells.<sup>17–20</sup> This impaired immune response to vaccination in older individuals has been linked with reduced protection against subsequent infection.<sup>9,21–23</sup> Importantly, interventions that enhance the immunogenicity of vaccines in aged mice are also effective in humans.<sup>17,22,24,25</sup>

ChAdOx1 nCoV-19 is a chimpanzee adeno (ChAd)-vectored vaccine that encodes the full-length spike protein of SARS-CoV-2. Vaccination with ChAdOx1 nCoV-19 elicits spike-specific T cells that produce IFN- $\gamma$  and anti-spike antibodies in mice, pigs, macaques, and people.<sup>26–28</sup> Here, we demonstrate that a single dose of ChAdOx1 nCoV-19 elicits a B and T cell response in 3-month-old adult mice, with formation of plasma cells, germinal centers, and T follicular helper cells contributing to anti-spike antibody production. The development of humoral immunity is complemented by the formation of polyfunctional SARS-CoV-2 spike-specific Th1 cells and CD8<sup>+</sup> T cells. In aged 22-month-old mice, a similar cellular and humoral response was observed upon vaccination, but the formation of germinal centers and spike-specific CD8<sup>+</sup> T cells that secrete granzyme B was impaired. Administration of a second dose enhanced the germinal center response, spike-specific IgG and virus-neutralizing antibody titer, and no deficit in spike-specific granzyme-B-producing CD8<sup>+</sup> T cells was observed in aged mice. Together, this indicates that the immunogenicity of ChAdOx1 nCoV-19 can be enhanced in older individuals through the use of a prime-boost vaccination strategy.

## RESULTS

### Intramuscular immunization with ChAdOx1 nCoV-19 activates antigen-presenting cells in the iliac lymph node and spleen

To map where antigen drains upon immunization, 3-month-old adult mice were immunized in the right quadriceps muscle with 20 nm fluorescent nanoparticles that freely drain into lymphoid organs.<sup>29</sup> 24 h after injection, confocal microscopy revealed fluorescent nanoparticles in the medial iliac lymph node (iLN) and the spleen of all immunized mice (Figure S1A). These data suggest the iLN and spleen are sites of antigen drainage.

To characterize the early events of the immune response to ChAdOx1 nCoV-19 vaccination, we immunized adult C57BL/6 mice and assessed the induction of IFN signaling as well as the expansion of antigen-presenting cell (APC) populations at day 1 and 2 post-immunization. At the site of immunization, expression of the type I and 2 IFN-inducible genes, *Mx1* and *Gbp2*, respectively, was detected by day 1 in ChAdOx1 nCoV immunized mice compared to phosphate-buffered saline

<sup>1</sup>Lymphocyte Signalling and Development, Babraham Institute, Babraham Research Campus, Cambridge CB22 3AT, UK

<sup>2</sup>The Jenner Institute, University of Oxford, Old Road Campus Research Building, Roosevelt Drive, Oxford OX3 7DQ, UK

<sup>3</sup>Biological Services Unit, Babraham Institute, Babraham Research Campus, Cambridge CB22 3AT, UK

<sup>4</sup>The Pirbright Institute, Ash Road, Pirbright GU24 0NF, UK

<sup>5</sup>These authors contributed equally

<sup>6</sup>These authors contributed equally

<sup>7</sup>Senior author

<sup>8</sup>Lead Contact

\*Correspondence:  
teresa.lambe@ndm.ox.ac.uk (T.L.),  
michelle.linterman@babraham.ac.uk (M.A.L.)  
<https://doi.org/10.1016/j.medj.2020.12.006>

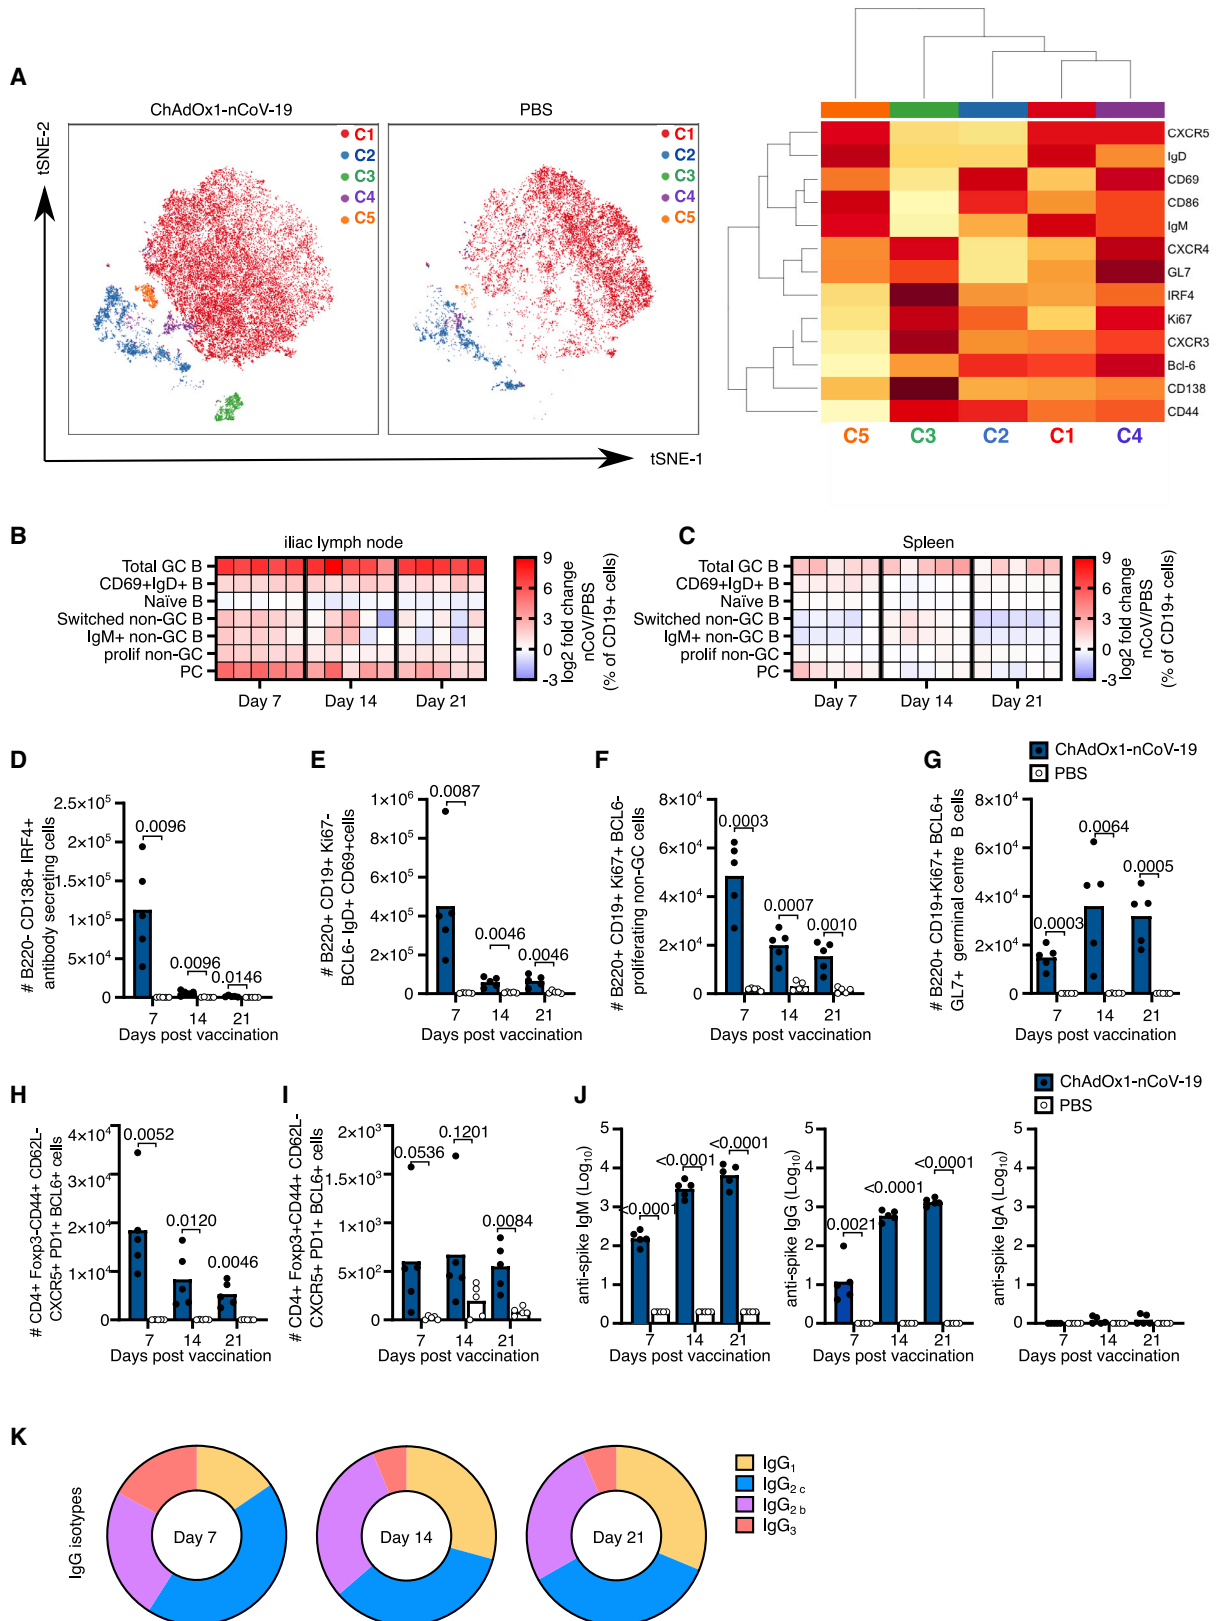

(PBS) immunized controls (Figure S1B). In the draining iLN and spleen, type 2 conventional dendritic cells (cDC2s), Langerhans cells, macrophages, and cDC1s were quantified by flow cytometry, and all subsets were activated in response to ChAdOx1 nCoV-19 (Figures S1C–S1E; gating strategy from<sup>30</sup>). These data demonstrate that the ChAdOx1 nCoV-19 vaccine activates several APC populations required for the initiation of cell-mediated and humoral immunity.<sup>17,31,32</sup>

### ChAdOx1 nCoV-19 immunization stimulates B cell activation and differentiation

To assess the adaptive immune response to ChAdOx1 nCoV-19 in detail, we used a high-dimensional flow cytometry panel that contained antibodies that recognize multiple molecules used to define different lymphocyte subsets and their activation status (Key Resources Table). Mice were immunized with either ChAdOx1 nCoV-19 or PBS, and the immune response was assessed 7, 14, and 21 days later. t-distributed stochastic neighbor embedding (tSNE) and FlowSOM analysis grouped B cells into five clusters (Figure 1A). Cluster 1 corresponded to naive B cells, which were present in both ChAdOx1 nCoV-19 and PBS-immunized mice, and four additional clusters which were over-represented in ChAdOx1 nCoV-19-immunized mice. The clusters represent activated B cells that express CD69<sup>+</sup> (cluster 2) or CD86<sup>+</sup> (cluster 5), a cluster of CD138<sup>+</sup>IRF4<sup>+</sup> antibody-secreting plasma cells (cluster 3) and Bcl6<sup>+</sup>GL-7<sup>+</sup> germinal center B cells (cluster 4). Manual biaxial gating of these populations (Figure S2A) showed that ChAdOx1 nCoV-19 immunization induced a B cell response in the draining lymph node and spleen (Figures 1B and 1C), with early B cell activation and plasma cell formation occurring in the first week after immunization, and the germinal center response persisting over the three weeks assessed (Figures 1B–1G). Formation of T follicular helper and T follicular regulatory cells accompanied the germinal center response (Figures 1H and 1I). Antibodies binding the SARS-CoV-2 spike protein were induced by vaccination, and, as expected, the temporal induction of anti-spike IgM was faster than that of IgG, and serum IgA antibodies were not observed at high titer (Figure 1J). Of note, the method of quantification does not facilitate direct comparison between IgG and IgM titer. A mix of anti-spike IgG antibody subtypes was observed, with IgG<sub>2</sub> and IgG<sub>1</sub> subclasses persisting at later time points. At all time points, a predominantly Th1 dominant response (IgG<sub>2</sub>) was measured (Figure 1K). The mean (and standard deviation) value for ratio of IgG<sub>2</sub>/IgG<sub>1</sub> on day 7 was 4.8 (1.4), on day 14 was 2.3 (0.5), and on day 21 was 2.8 (1.8). This demonstrates that ChAdOx1 nCoV-19 immunization stimulates B cell activation and differentiation, culminating in the production of anti-spike antibodies.

### ChAdOx1 nCoV-19 immunization induces Th1 cell and Th1-like Treg formation

To investigate how ChAdOx1 nCoV-19 immunization affects CD4<sup>+</sup> T cells beyond the germinal center-associated subsets, tSNE analysis followed by manual gating

#### Figure 1. ChAdOx1 nCoV-19 induces a plasma cell and germinal center B cell response

(A) tSNE/FlowSOM analyses of CD19<sup>+</sup> B cells from 3-month-old (3mo) mice 7 days after immunization with ChAdOx1 nCoV-19 or PBS; on the heatmap, red indicates high expression, and yellow indicates low expression.  
(B and C) Heatmaps of the manually gated B cell populations indicated at 7, 14, and 21 days after immunization in the iliac lymph node (B) and spleen (C); the gating strategy for these populations is shown in Figure S2. Here, the frequency of each cell subset in each ChAdOx1 nCoV-19-immunized mouse has been expressed as the log<sub>2</sub> fold change over the average frequency in PBS-immunized mice (n = 5).  
(D–J) Bar charts showing the total number of plasma cells (D), CD69<sup>+</sup>IgD<sup>+</sup> B cells (E), proliferating non-germinal center B cells (F) and germinal center B cells (G) at the indicated time points after immunization. Number of T follicular helper (H) and T follicular regulatory cells (I) at the indicated time points post-immunization. Serum anti-spike IgM, IgG, and IgA (J) antibodies 7, 14, and 21 days after immunization.  
(K) Pie charts indicating the mean abundance of each IgG antibody subclass in the serum at the indicated time points after immunization. In (D)–(J), the bar height corresponds to the mean and each circle represents one biological replicate. p values are calculated using a Student's t test with Holm-Sidak multiple testing correction; for ELISA, data analyses were done on log transformed values.

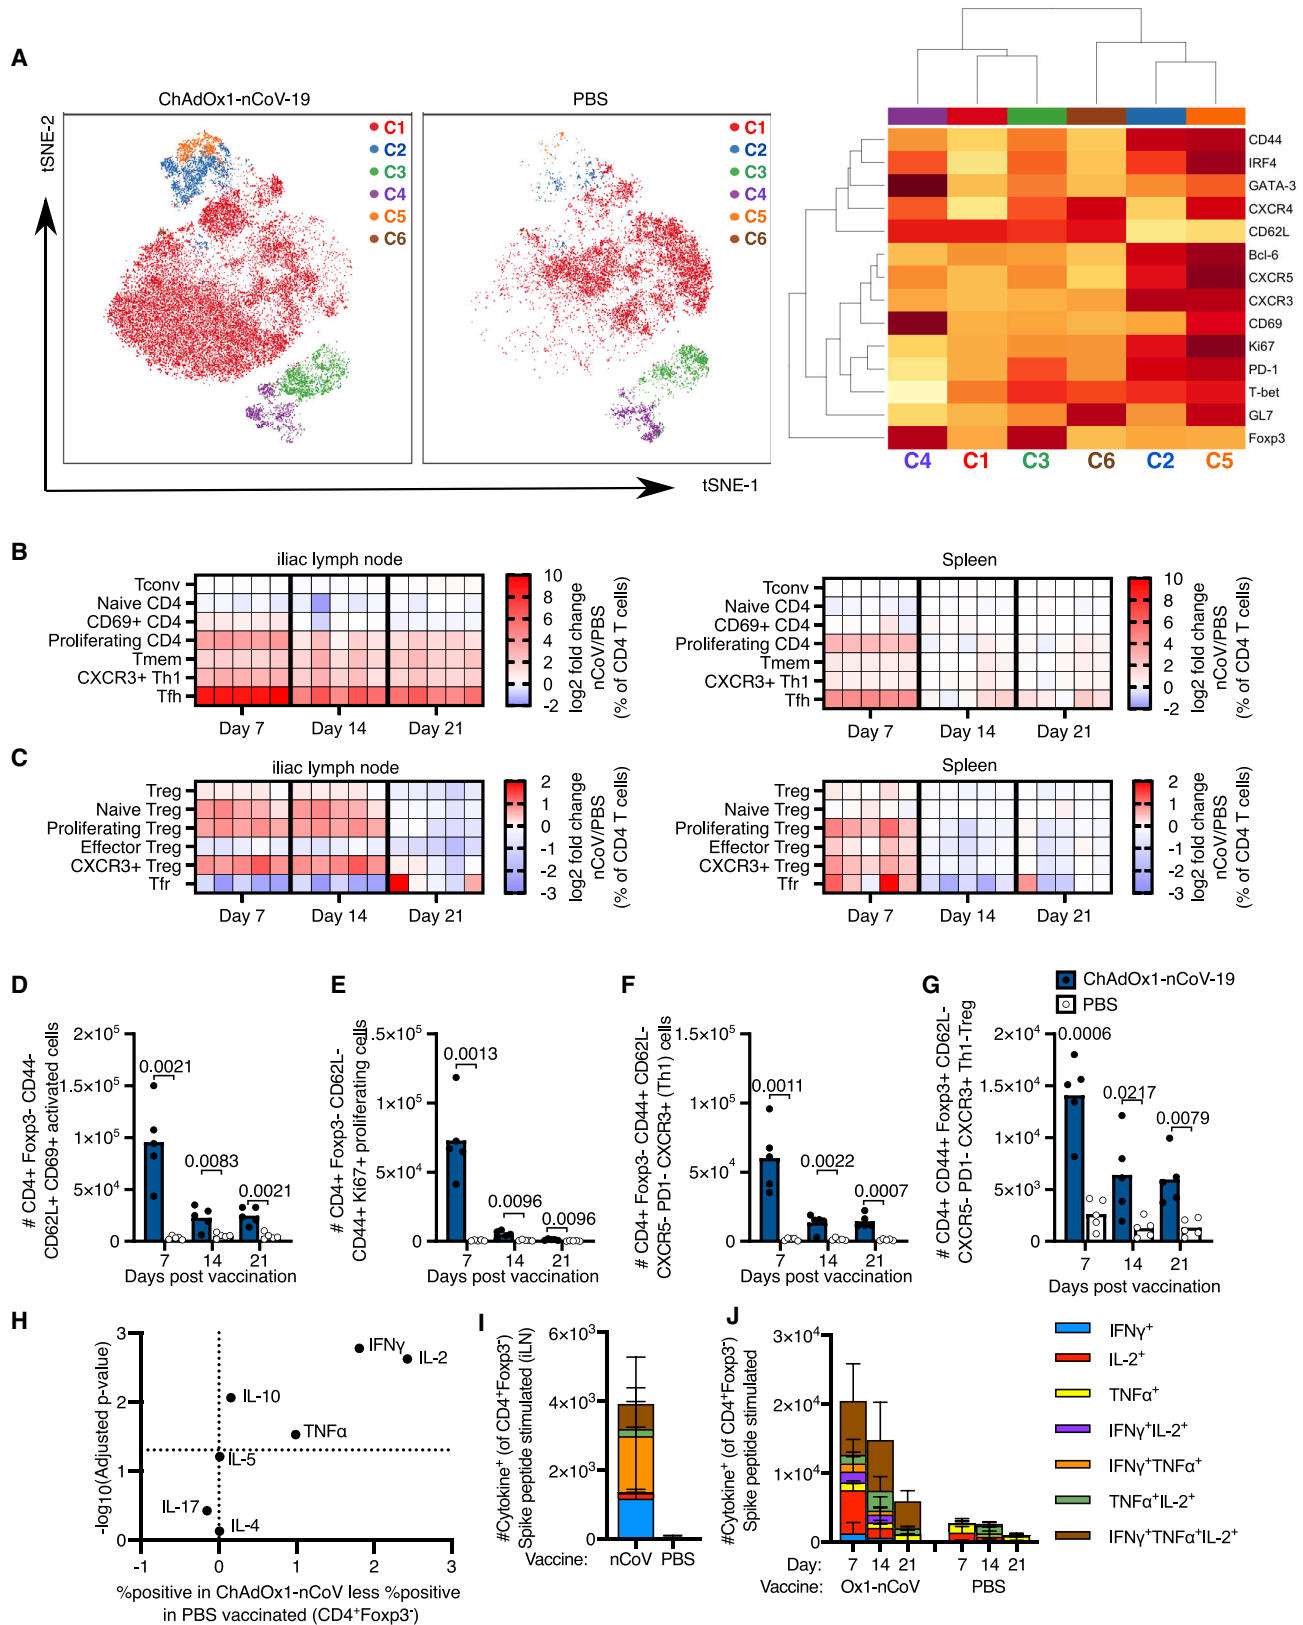

was performed (Figures 2A and 2B; Figures S2B and S2C). tSNE/FlowSOM clustering showed that vaccination induced populations of T cells that express markers associated with T follicular helper cells (cluster 5), Th1 cells (cluster 2), Tbet-expressing Th1-like Tregs (cluster 3), and CD69<sup>+</sup>-activated Treg cells (cluster 4) (Figure 2A). The conventional CD4<sup>+</sup> T cell response to ChAdOx1 nCoV-19 was characterized by early activation and proliferation, as well as the formation of CXCR3<sup>+</sup> Th1 cells (Figures 2A–2F). The Foxp3<sup>+</sup> regulatory T cell response was characterized by early expression of Ki67, indicative of proliferation, and the differentiation of CXCR3<sup>+</sup> Th1-like cells (Figures 2C and 2G). To further characterize CD4<sup>+</sup> T cell responses after vaccination, cells from the iLN were restimulated with PdBu/ionomycin and cytokine production was assessed. IL-2, TNF- $\alpha$ , IL-10, and IFN- $\gamma$  were induced by cells isolated from animals that had been ChAdOx1 nCoV-19 vaccinated, with no difference observed in Th17-associated IL-17 or the Th2-associated cytokines IL-4 and IL-5 (Figure 2H; Figure S3A–S3C). The spike specificity of this Th1-associated response in the draining lymph node was confirmed by restimulation of cells with peptide pools from SARS-CoV-2 spike protein (Figure 2I). In the spleen, spike-specific IL-2, TNF- $\alpha$ , and IFN- $\gamma$ -producing CD4<sup>+</sup> T cells were observed, with triple producers persisting 21-days after immunization (Figure 2J, Figure S3D), consistent with previous work.<sup>26</sup> Therefore, ChAdOx1 nCoV-19 vaccination induces an early formation of Th1 cells and Th1-like Treg cells accompanied by the induction of spike-specific Th1-skewed cytokine-secreting cells.

### ChAdOx1 nCoV-19 induces a CD8<sup>+</sup> T cell response

tSNE analysis of CD8<sup>+</sup> T cells from the iLNs of ChAdOx1 nCoV-19-immunized and PBS control mice revealed distinct clustering 7 days after immunization. There were five CD8<sup>+</sup> T cell clusters that were more abundant in ChAdOx1 nCoV-19-immunized mice, than in PBS-immunized animals. Cluster 2 contains markers consistent with a CXCR5<sup>+</sup> follicular CD8 cell population, cluster 3 is characterized by CXCR3 expression a marker of tissue homing, clusters 4 and 5 expresses CD69 and CD62L consistent with CD8 cells at an early stage of activation, and cluster 6 expresses high levels of CXCR4 a chemokine receptor that facilitates bone-marrow localization of CD8<sup>+</sup> T cells (Figure 3A). Together, this highlights that a diverse array of CD8<sup>+</sup> T cell subsets are induced by ChAdOx1 nCoV-19. In order to understand how the response evolves over time, manual gating of different CD8<sup>+</sup> T cell populations (Figure S2D), including those identified in the tSNE analysis, was done on samples taken 7, 14, and 21 days after immunization. In the iLN and spleen, the CD8<sup>+</sup> T cell response to ChAdOx1 nCoV-19 was characterized by an increase in Ki67 expression, the upregulation of the activation markers CD69, CXCR3, and PD-1, as well as the formation of CD44<sup>+</sup>CD62L<sup>-</sup> antigen-experienced T cells (Figures

### Figure 2. ChAdOx1 nCoV-19 induces a Th1-dominated CD4 cell response

(A) tSNE/FlowSOM analyses of CD4<sup>+</sup> T cells from 3-month-old (3mo) mice 7 days after immunization with ChAdOx1 nCoV-19 or PBS; on the heatmap, red indicates high expression, and yellow indicates low expression.

(B and C) Heatmaps of the manually gated CD4<sup>+</sup>Foxp3<sup>-</sup> (B) and Foxp3<sup>+</sup>CD4<sup>+</sup> (C) T cell populations indicated at 7, 14, and 21 days after immunization in the iliac lymph node (right) and spleen (left), the gating strategy for these populations is shown in Figure S2. Here, the frequency of each cell subset in each ChAdOx1 nCoV-19-immunized mouse has been expressed as the log2 fold change over the average frequency in PBS-immunized mice (n = 5). (D–G) Bar charts showing the number of CD69<sup>+</sup>CD62L<sup>+</sup>CD44<sup>-</sup>CD4<sup>+</sup>Foxp3<sup>-</sup> (D), Ki67<sup>+</sup>CD4<sup>+</sup>Foxp3<sup>-</sup> (E) CXCR3<sup>+</sup> non-Tfh cells (F) and CXCR3<sup>+</sup> Th1-like Treg cells (G) CD4<sup>+</sup> cells in the iliac lymph node of ChAdOx1 nCoV-19 or PBS-immunized mice, at the indicated time points post-immunization.

(H) Analysis of cytokine production 6 h after PdBu/ionomycin stimulation of iliac lymph node cells from 3-month-old mice 7 days after immunization with ChAdOx1 nCoV-19 or PBS.

(I and J) Stacked bar plots show the number of CD4<sup>+</sup>Foxp3<sup>-</sup> cells singly or co-producing IFN- $\gamma$ , IL-2, or TNF- $\alpha$  in the iLN 7 days after immunization (I) or spleen at the days post-immunization (J); 6 h after restimulation with SARS-CoV-2 peptide pools, each bar segment represents the mean and the error bars the standard deviation.

In (D)–(G), the bar height corresponds to the mean and each circle represents one biological replicate. p values are calculated using a Student's t test with Holm-Sidak multiple testing correction.

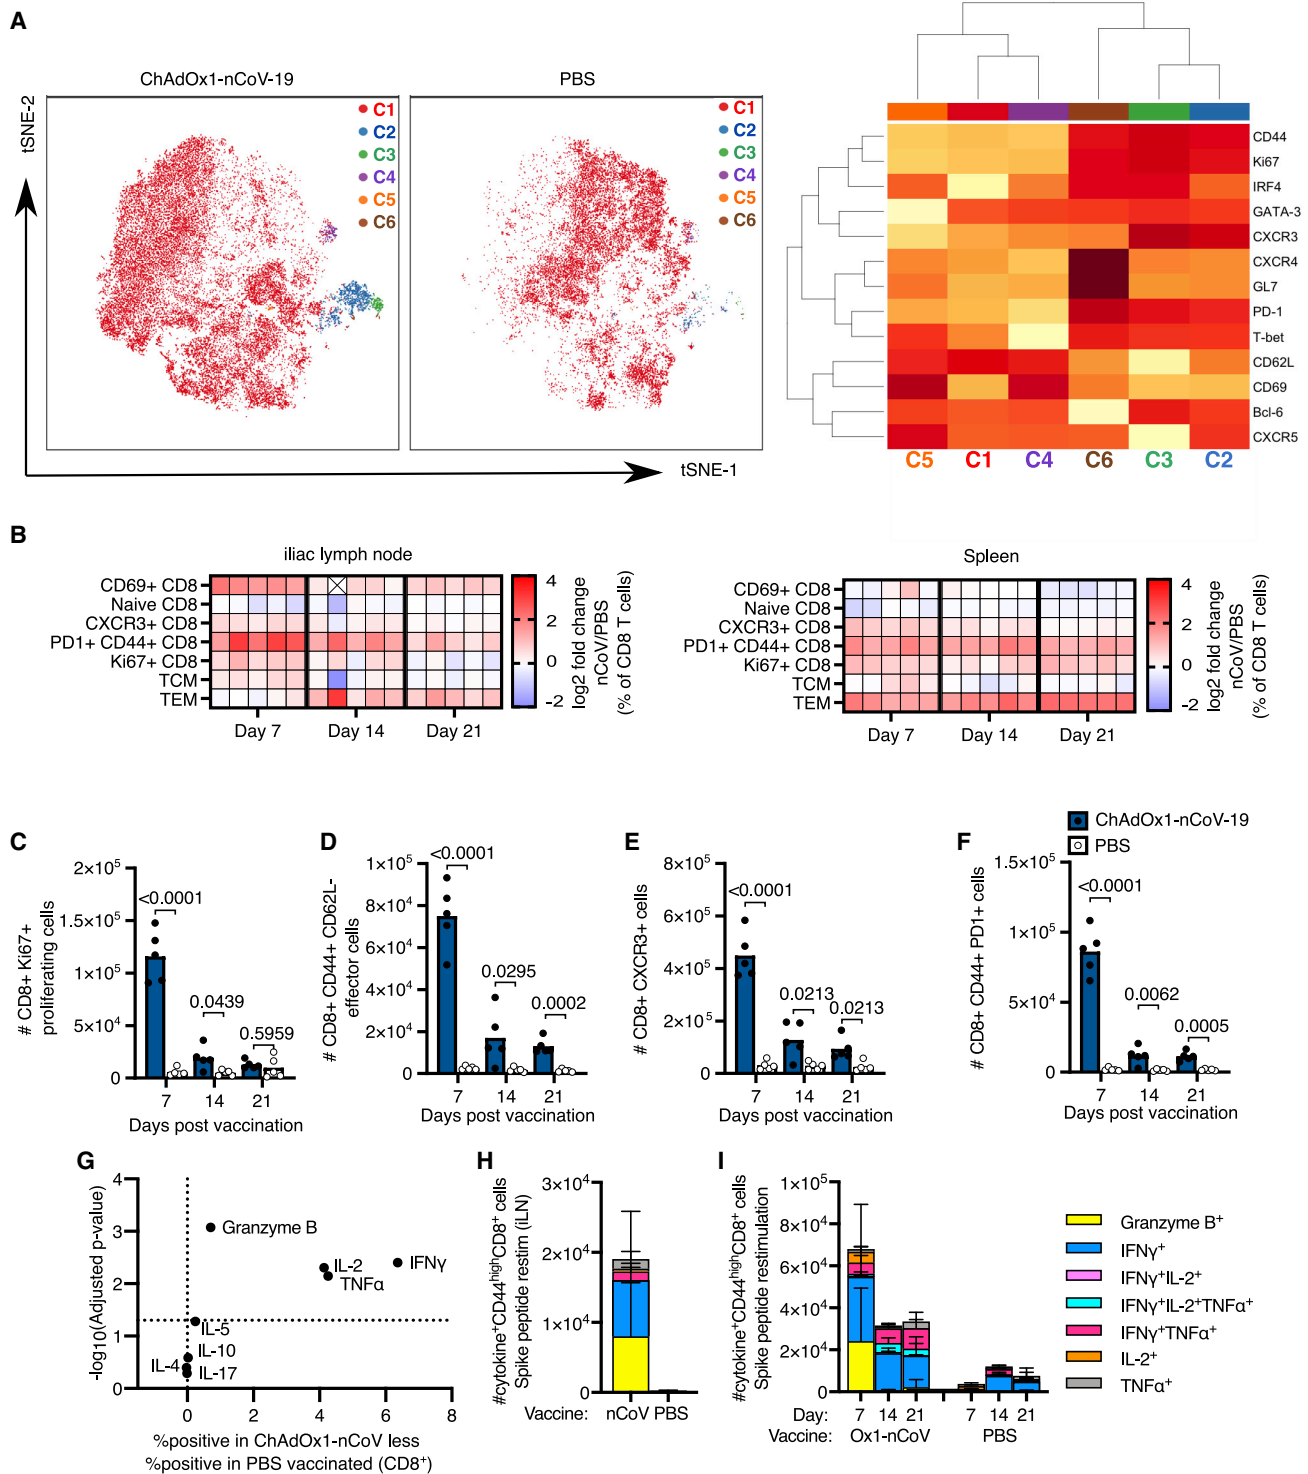

**Figure 3. ChAdOx1 nCoV-19 induces a CD8 T cell response**

(A) tSNE/FlowSOM analyses of CD8<sup>+</sup> T cells from 3-month-old (3mo) mice 7 days after immunization with ChAdOx1 nCoV-19 or PBS; on the heatmap red indicates high expression, and yellow indicates low expression.

(B) Heatmap of the manually gated CD8 T cell populations indicated at 7, 14, and 21 days after immunization in the iliac lymph node and spleen; the gating strategy for these populations is shown in Figure S2. The frequency of each cell subset in each ChAdOx1 nCoV-19-immunized mouse has been expressed as the log<sub>2</sub> fold change over the average frequency in PBS-immunized mice (n = 5). Crossed boxes indicate that there were none of that cell type for that mouse.



3B–3F). To characterize the overall production of granzyme B and cytokines by CD8<sup>+</sup> T cells 7 days after vaccination, cells from the iLN were restimulated with PdBu/ionomycin. There was a significant production of granzyme B, IL-2, TNF- $\alpha$ , and IFN- $\gamma$  in ChAdOx1 nCoV-19-vaccinated mice compared to PBS-immunized mice (Figure 3G). The spike specificity of cytokine-producing cells in the draining lymph node was confirmed by restimulation with SARS-CoV-2 peptide pools (Figure 3H). Restimulation of splenocytes with SARS-CoV-2 spike protein peptide pools from SARS-CoV-2 showed that spike-specific cytokine-producing CD8<sup>+</sup> T cells form in response to immunization (Figure 3I; Figures S4A and S4B). Spike-specific granzyme-B-producing CD8<sup>+</sup> T cells formed early and tended not to co-produce cytokines (Figure 3I). Both single and multiple cytokine-producing spike-specific cells formed at all time points, with TNF- $\alpha$  and IFN- $\gamma$  being the dominant cytokines expressed (Figure 3I; Figure S4C). With this dosing regimen, these data demonstrate that ChAdOx1 nCoV-19 stimulates a spike-specific CD8<sup>+</sup> T cell response that peaks around the first week after vaccination.

### A prime-boost strategy corrects dysregulated CD8 T cell priming in aged mice

To assess the CD8<sup>+</sup> T cell response to ChAdOx1 nCoV-19 immunization in the context of aging, we immunized 3- and 22-month-old mice and enumerated the CD8<sup>+</sup> T cell types altered by vaccination (in Figure 3) 9 days after immunization (Figure 4A). In the draining iLN, CD8<sup>+</sup> T cells from aged mice expressed markers of activation and proliferation in response to ChAdOx1 nCoV-19. Unlike in younger adult mice, the frequency of CXCR3<sup>+</sup> cells or antigen-experienced cells did not increase in aged mice, compared to the PBS-vaccinated group (Figures 4B–4D). At this early time point, the frequency of central memory T cells was not altered in either younger adult or aged mice by ChAdOx1 nCoV-19 vaccination (Figure 4E). In the spleen, fewer Ki67<sup>+</sup> CD8<sup>+</sup> T cells were observed in aged mice after ChAdOx1 nCoV-19 vaccination, compared to younger adult mice (Figure 4F). The formation of spike-specific CD8<sup>+</sup> T cells was assessed by restimulating splenocytes with SARS-CoV-2 spike protein peptide pools. Aged mice had a near absence of spike-specific granzyme-B-producing CD8<sup>+</sup> T cells, but production of IFN- $\gamma$  and TNF- $\alpha$  was not significantly impaired compared to younger mice (Figure 4G). Despite a trend to lower cytokine production by CD8<sup>+</sup> T cells in aged mice, the proportion of polyfunctional spike-specific CD8<sup>+</sup> T cells was not significantly diminished in aged mice after ChAdOx1 nCoV-19 vaccination (Figure 4H). This demonstrates that a single dose of ChAdOx1 nCoV-19 induces an altered CD8<sup>+</sup> T cell response in aged mice characterized primarily by a failure to form spike-specific granzyme-B-producing effector cells.

To determine whether a second dose could improve this response, we administered a booster dose of ChAdOx1 nCoV-19 1 month after prime immunization (Figure 4I). Nine days after boost, an increase in Ki67<sup>+</sup> CD8<sup>+</sup> T cells was not observed in the draining iLN (Figure 4J), possibly due to the kinetics of the secondary response being faster than the primary. A significant increase in CXCR3<sup>+</sup> CD8<sup>+</sup> T cells and

(C–F) Bar charts showing the number of Ki67<sup>+</sup> (C), antigen-experienced CD44<sup>+</sup>CD62L<sup>−</sup> (D), CXCR3<sup>+</sup> (E), and PD-1<sup>+</sup>CD44<sup>+</sup> (F) CD8 cells in the iliac lymph node of ChAdOx1 nCoV-19 or PBS-immunized mice, at the indicated time points post-immunization.

(G) Analysis of cytokine production 6 h after PdBu/ionomycin stimulation of iliac lymph node cells from 3-month-old mice 7 days after immunization with ChAdOx1 nCoV-19 or PBS.

(H and I) Stacked bar plots show the number of CD8<sup>+</sup> cells singly or co-producing Granzyme B, IFN- $\gamma$ , IL-2, or TNF- $\alpha$  6 h after restimulation with SARS-CoV-2 peptide pools, in the iLN 7 days after immunization (H) or spleen 7, 14, and 21 days after immunization (I); each bar segment represents the mean and the error bars the standard deviation.

In (C)–(F), the bar height corresponds to the mean, and each circle represents one biological replicate. p values are calculated using a Student's t test with Holm-Sidak multiple testing correction.

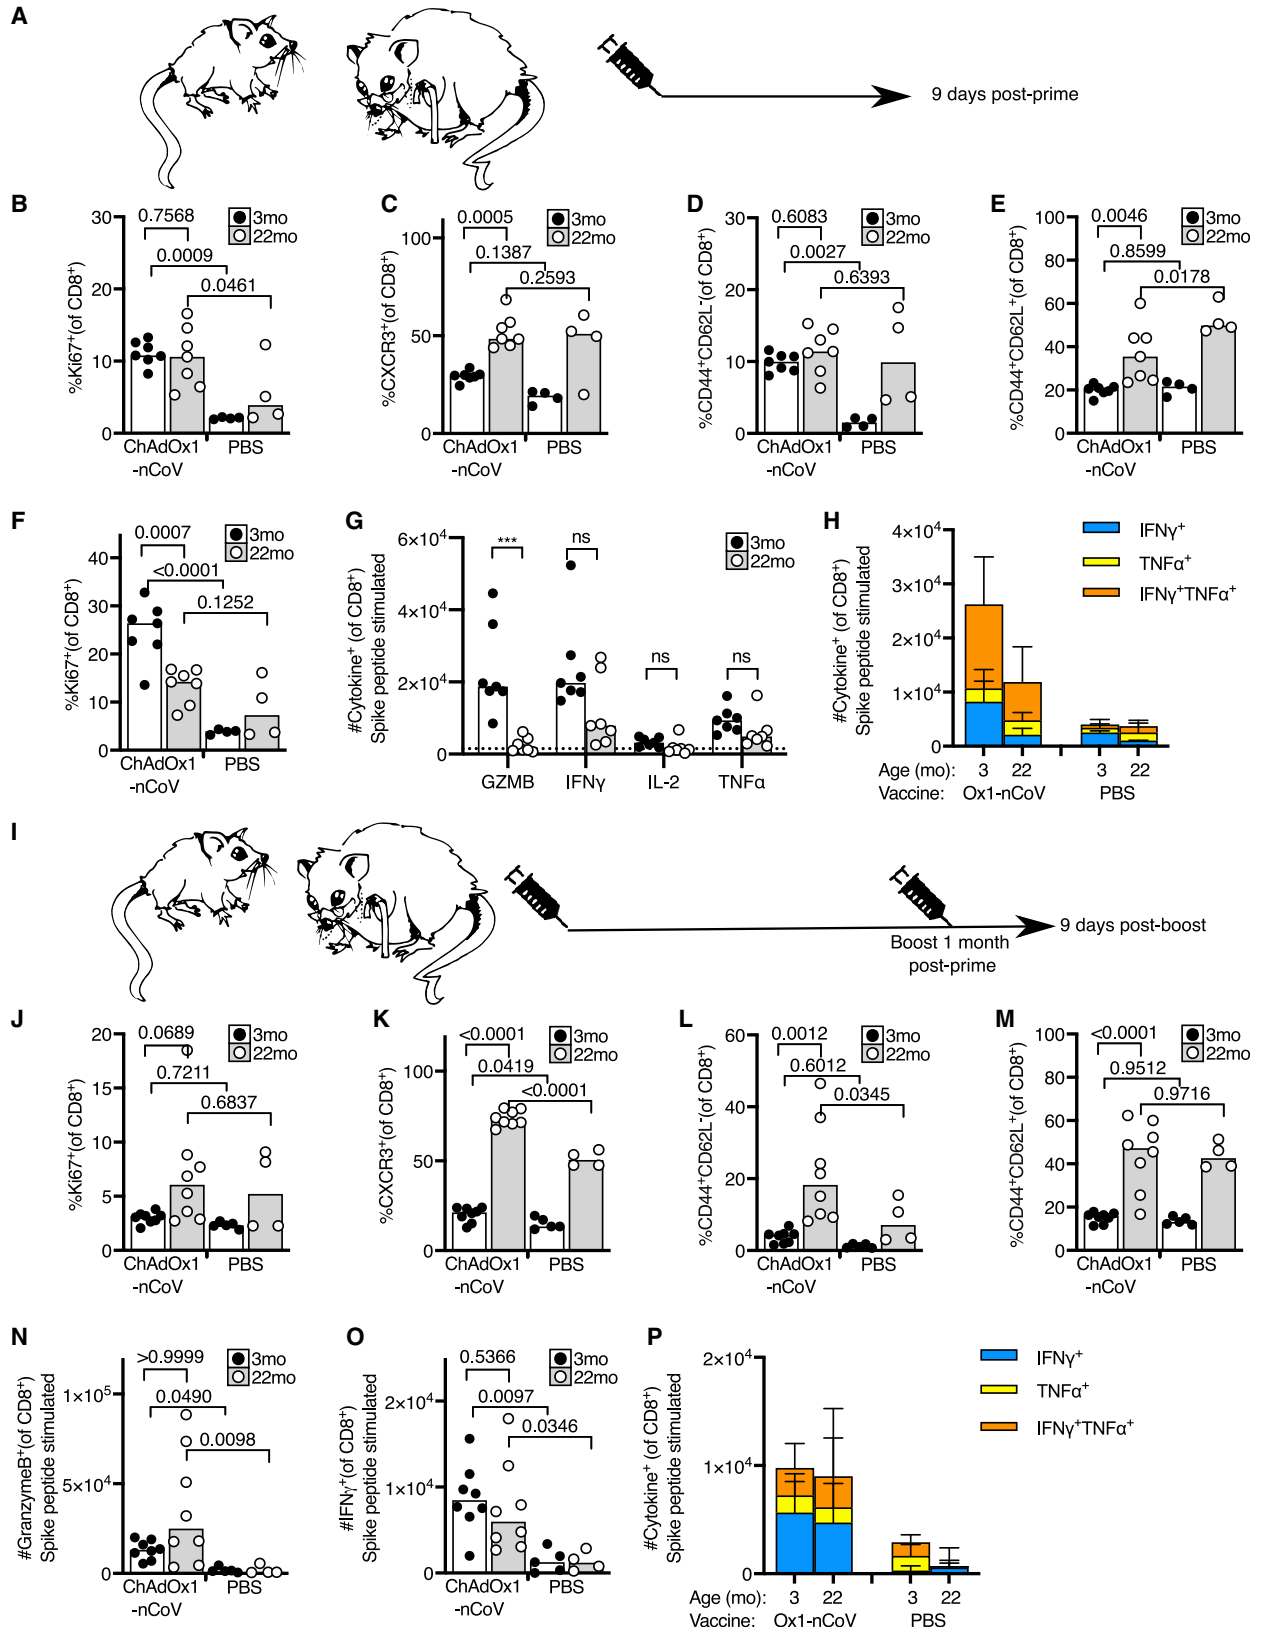

antigen-experienced cells was observed in aged mice after boost, with no change in the proportion of central memory cells in either age group (Figures 4K–4M). Assessment of spike-specific T cells showed that the booster dose of ChAdOx1 nCoV-19 rescued the production of granzyme-B-producing CD8<sup>+</sup> T cells in aged mice (Figure 4N). IFN- $\gamma$  production and cytokine polyfunctionality were similar to that following prime immunization (Figures 4O and 4P). This demonstrates that ChAdOx1 nCoV-19 is immunogenic in aged mice, and a booster dose can correct the age-dependent defect in the formation of spike-specific granzyme-B-producing CD8<sup>+</sup> T cells.

### Prime-boost enhances the CD4<sup>+</sup> T cell response to ChAdOx1 nCoV-19 in aged mice

Nine days after primary immunization of aged mice (Figure 5A), an increase in Ki67<sup>+</sup>CD4<sup>+</sup> T cells and CXCR3-expressing Th1 cells was observed in the draining lymph node of ChAdOx1 nCoV-19-immunized mice compared to PBS-immunized control mice (Figures 5B and 5C). This was accompanied by an increase in the frequency of Th1-like Tregs in both adult and aged mice (Figure 5D). An increased frequency of these cell types was likewise observed in the spleen in response to ChAdOx1 nCoV-19 immunization in both adult and aged mice (Figures 5E–5G). It is notable that, by these measurements, the response in aged mice is comparable to that in younger adults. The spike-specific CD4<sup>+</sup> T cell response was assessed by restimulating splenocytes with SARS-CoV-2 spike protein peptide pools. As in young mice (Figure 2), the response in aged mice to ChAdOx1 nCoV-19 was Th1 dominated; however, there were fewer spike-specific cytokine-producing cells in aged mice 9 days after a single immunization ( $p < 0.001$ , Figures 5H and 5I).

A booster dose of ChAdOx1 nCoV-19 administered 1 month after prime (Figure 5J) stimulated Ki67 expression and the formation of CXCR3<sup>+</sup>CD44<sup>+</sup> Th1 cells but not CXCR3<sup>+</sup> Th1-like Treg cells in the draining lymph node of aged mice (Figures 5K–5M). In the spleen, the booster dose did not enhance the frequency of Ki67<sup>+</sup> CD4<sup>+</sup> T cells or the formation of CXCR3<sup>+</sup> conventional or regulatory T cells in adult or aged mice (Figures 5N–5P). In contrast to the response to primary immunization, the number of spike-specific cytokine-producing cells was comparable in adult and aged mice after booster immunization (Figures 5Q and 5R). Together, this indicates

### Figure 4. A prime-boost strategy enhances the CD8 T cell response to ChAdOx1 nCoV-19 in aged mice

(A) Cartoon of prime immunization strategy.

(B–E) Percentage of Ki67<sup>+</sup> (B), CXCR3<sup>+</sup> (C), antigen-experienced CD44<sup>+</sup>CD62L<sup>-</sup> (D), and central memory CD44<sup>+</sup>CD62L<sup>+</sup> (E) CD8<sup>+</sup> T cells in the draining iliac lymph node from 3-month-old (3mo) or 22-month-old (22mo) mice 9 days after immunization with ChAdOx1 nCoV-19 or PBS.

(F) Percentage of proliferating Ki67<sup>+</sup> splenic CD8<sup>+</sup> T cells in 3-month-old (3mo) or 22-month-old (22mo) mice 9 days after immunization with ChAdOx1 nCoV-19 or PBS.

(G and H) Number of CD8<sup>+</sup> T cells producing granzyme B (GZMB), IFN- $\gamma$ , IL-2, or TNF- $\alpha$  6 h after restimulation with SARS-CoV-2 peptide pools in (G), and the number of single and double cytokine-producing CD8<sup>+</sup> T cells are represented in stacked bar charts. Spleen cells are taken from 3-month-old (3mo) or 22-month-old (22mo) mice 9 days after immunization with ChAdOx1 nCoV-19 or PBS.

(I) Cartoon of prime-boost immunization strategy.

(J–M) Percentage of Ki67<sup>+</sup> (J), CXCR3<sup>+</sup> (K), antigen-experienced CD44<sup>+</sup>CD62L<sup>-</sup> (L), and central memory CD44<sup>+</sup>CD62L<sup>+</sup> (M) CD8<sup>+</sup> T cells in the draining iliac lymph node from 3-month-old or 22-month-old mice 9 days after immunization with ChAdOx1 nCoV-19 or PBS.

(N–P) Percentage of proliferating Ki67<sup>+</sup> splenic CD8<sup>+</sup> T cells in 3-month-old or 22-month-old mice 9 days after immunization with ChAdOx1 nCoV-19 or PBS. Number of CD8<sup>+</sup> cells producing Granzyme B (N) or IFN- $\gamma$  (O) 6 h after restimulation with SARS-CoV-2 peptide pools in (P), and the number of single and double cytokine-producing CD8<sup>+</sup> T cells are represented in stacked bar charts. Spleen cells are taken from 3-month-old or 22-month-old mice 9 days after immunization with ChAdOx1 nCoV-19 or PBS.

The bar height in B–G, J–O corresponds to the median and each circle represents one biological replicate. In (H), (P), each bar segment represents the mean and the error bars the standard deviation. The Shapiro-Wilk normality test was used to determine whether the data are consistent with a normal distribution, followed by either an ordinary one-way ANOVA test for data with a normal distribution or a Kruskal-Wallis test for non-normally distributed data alongside a multiple comparisons test. Data are representative of two independent experiments ( $n = 4-8$  per group/experiment).

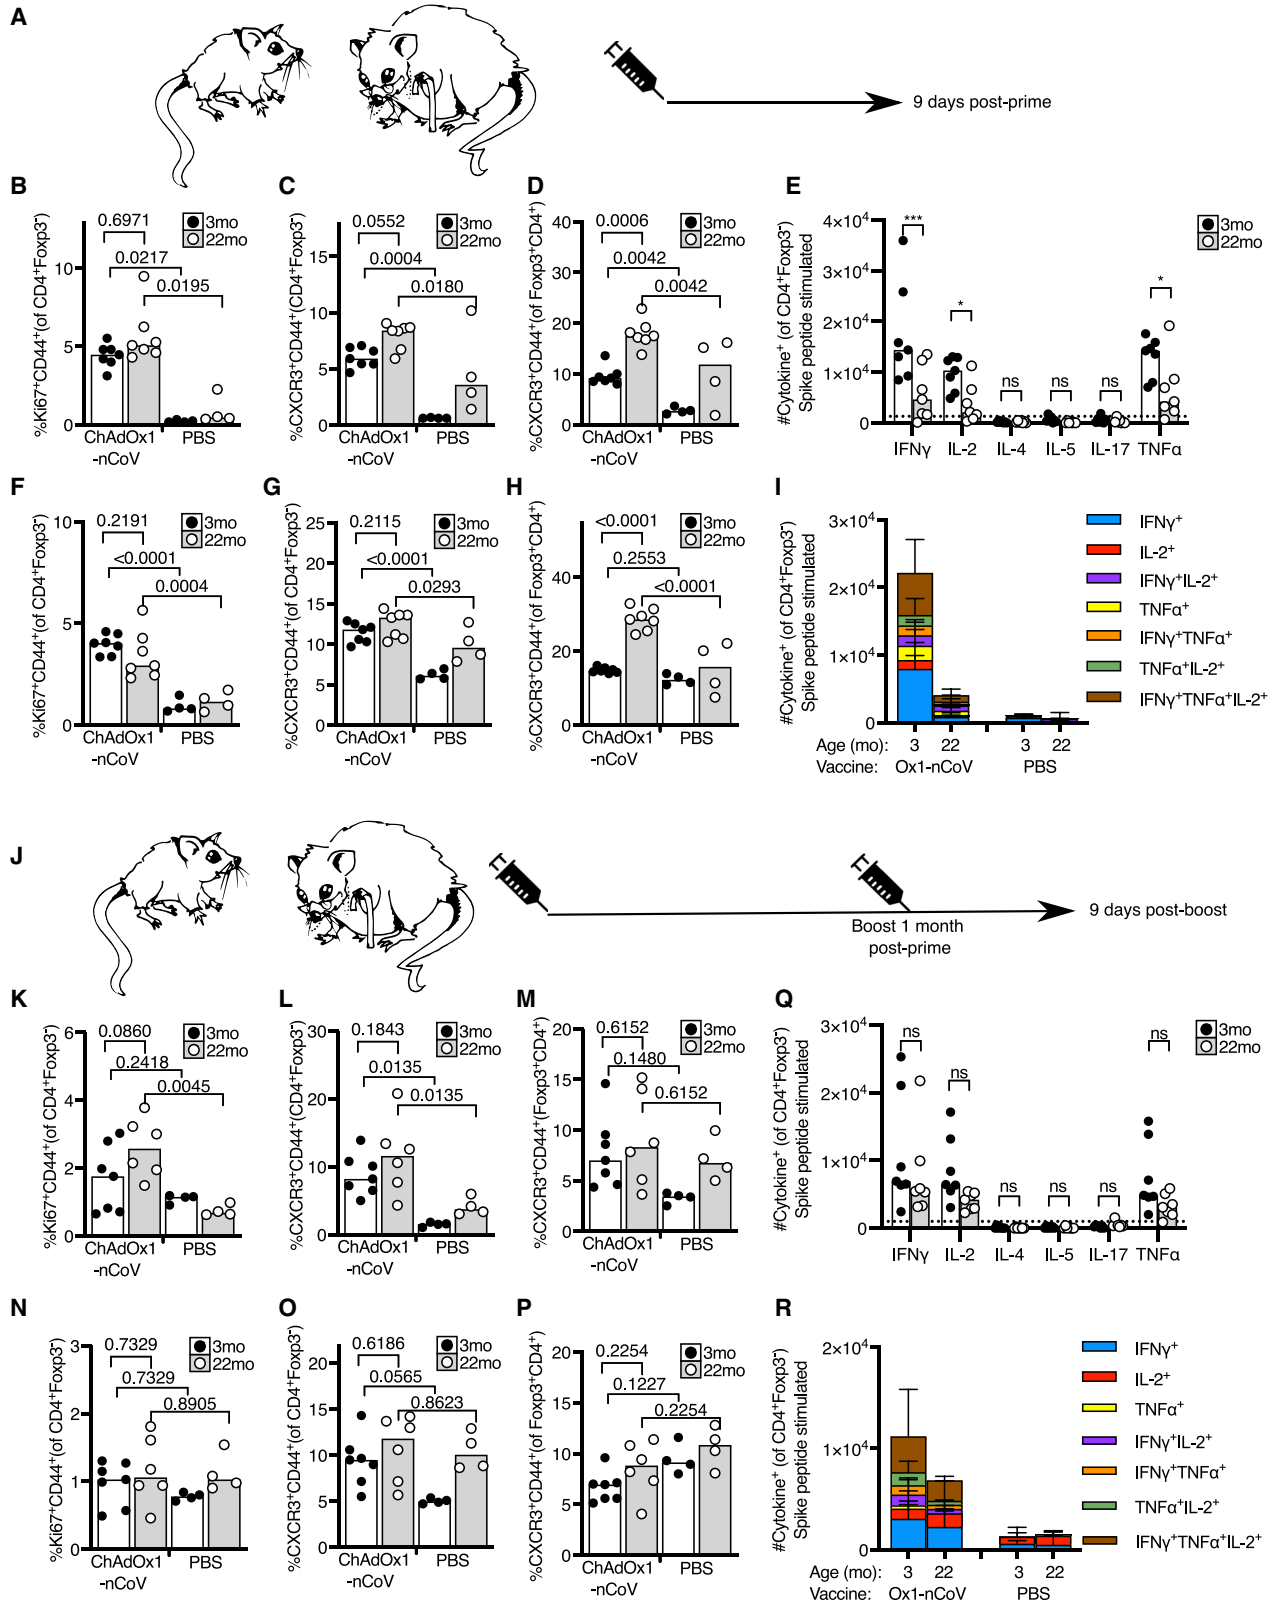

that the CD4<sup>+</sup> T cell response to ChAdOx1 nCoV-19 immunization is largely intact in aged mice, with a slight deficiency in antigen-specific cytokine production that can be enhanced by a booster immunization.

### Aged mice have an impaired germinal center response after primary immunization

The majority of clinically available vaccines are thought to provide protection by eliciting humoral immunity. Therefore, it was important to quantify the B cell response to ChAdOx1 nCoV-19 vaccination in the context of aging. Early antibody production after vaccination arises from antibody-secreting cells generated in the extrafollicular plasma cell response, which is fast but typically short lived.<sup>33</sup> A comparable early plasma cell response was detected in the iLN of younger adult and aged mice after immunization (Figures 6A and 6B), although there was an increase in the proportion of IgM<sup>+</sup> plasma cells in aged mice (Figure 6C). An intact plasma cell response was coupled with an increase in anti-spike antibodies 9 days after immunization. These were of only slightly lower titer in aged mice, and of similar IgG subclass distribution to younger animals, indicative of a predominantly Th1-dominated response (Figures 6D–6F).

Long-lived antibody-secreting cells typically arise from the germinal center response.<sup>34</sup> The percentage, but not total number, of germinal center B cells was reduced in aged mice compared to younger adult mice after ChAdOx1 nCoV-19 vaccination (Figures 6G and 6H). Like the plasma cell response, there were more IgM<sup>+</sup> germinal center B cells in aged mice (Figure 6I). An increase in T follicular helper cells, but not T follicular regulatory cells, accompanied the lymph node germinal center response in adult and aged mice (Figures 6J and 6K). In the spleen, germinal centers were easily visualized by microscopy in adult mice 9 days after ChAdOx1 nCoV-19 vaccination but were conspicuously absent in aged mice (Figure 6L; Figure S5). Quantification of splenic germinal centers by flow cytometry confirmed impaired germinal center formation in aged mice (Figures 6N and 6O). This was accompanied by fewer proliferating non-germinal center B cells and T follicular helper cells in aged mice (Figures 6P and 6Q). As in the draining lymph node, splenic T follicular regulatory cells were not induced by ChAdOx1 nCoV-19 vaccination at this time point (Figure 6R). The impact of an impaired germinal center response on spike-specific antibodies was observed 28 days after immunization, with aged mice having lower titers of anti-spike IgM and IgG (Figures 6S and 6T) but a similar profile of IgG

#### Figure 5. The CD4 cell response to ChAdOx1 nCoV-19 in aged mice

(A) Cartoon of prime immunization strategy.  
(B–G) Percentage of proliferating Ki67<sup>+</sup> (B), CXCR3<sup>+</sup>CD44<sup>+</sup> CD4<sup>+</sup> T cells (C) and CXCR3<sup>+</sup>CD44<sup>+</sup>Foxp3<sup>+</sup> Treg cells (D) in the draining iliac lymph node. Percentage of proliferating Ki67<sup>+</sup> (E), CXCR3<sup>+</sup>CD44<sup>+</sup> CD4<sup>+</sup> T cells (F) and CXCR3<sup>+</sup>CD44<sup>+</sup>Foxp3<sup>+</sup> Treg cells (G) in the spleen of 3-month-old or 22-month-old mice 9 days after immunization with ChAdOx1 nCoV-19 or PBS.  
(H and I) Number of CD4<sup>+</sup>Foxp3<sup>+</sup> cells producing IFN- $\gamma$ , IL-2, IL-4, IL-5, IL-17, or TNF- $\alpha$  6 h after restimulation with SARS-CoV-2 peptide pools in (I), and the number of single and multiple cytokine-producing CD4<sup>+</sup> T cells are represented in stacked bar charts.  
(J) Cartoon of prime-boost immunization strategy.  
(K–M) Percentage of proliferating Ki67<sup>+</sup> (K), CXCR3<sup>+</sup>CD44<sup>+</sup> CD4<sup>+</sup> T cells (L), and CXCR3<sup>+</sup>CD44<sup>+</sup>Foxp3<sup>+</sup> Treg cells (M) in the draining iliac lymph node.  
(N–P) Percentage of Ki67<sup>+</sup> CD44<sup>+</sup> (N), CXCR3<sup>+</sup>CD44<sup>+</sup> CD4<sup>+</sup>Foxp3<sup>+</sup> T cells (O), and CXCR3<sup>+</sup>CD44<sup>+</sup>Foxp3<sup>+</sup> Treg cells (P) in the spleen of 3-month-old or 22-month-old mice 9 days after immunization with ChAdOx1 nCoV-19 or PBS.  
(Q and R) Number of CD4<sup>+</sup>Foxp3<sup>+</sup> T cells producing IFN- $\gamma$ , IL-2, IL-4, IL-5, IL-17, or TNF- $\alpha$  6 h after restimulation with SARS-CoV-2 peptide pools in (R), and the number of single and multiple cytokine-producing CD4<sup>+</sup> T cells are represented in stacked bar charts. In (B–H) and (K–P), the bar height corresponds to the median, and each circle represents one biological replicate.  
In (I) and (R), each bar segment represents the mean and the error bars the standard deviation. The Shapiro-Wilk normality test was used to determine whether the data are consistent with a normal distribution, followed by either an ordinary one-way ANOVA test for data with a normal distribution or a Kruskal-Wallis test for non-normally distributed data alongside a multiple comparisons test. Data are representative of two independent experiments (n = 4–8 per group/experiment).

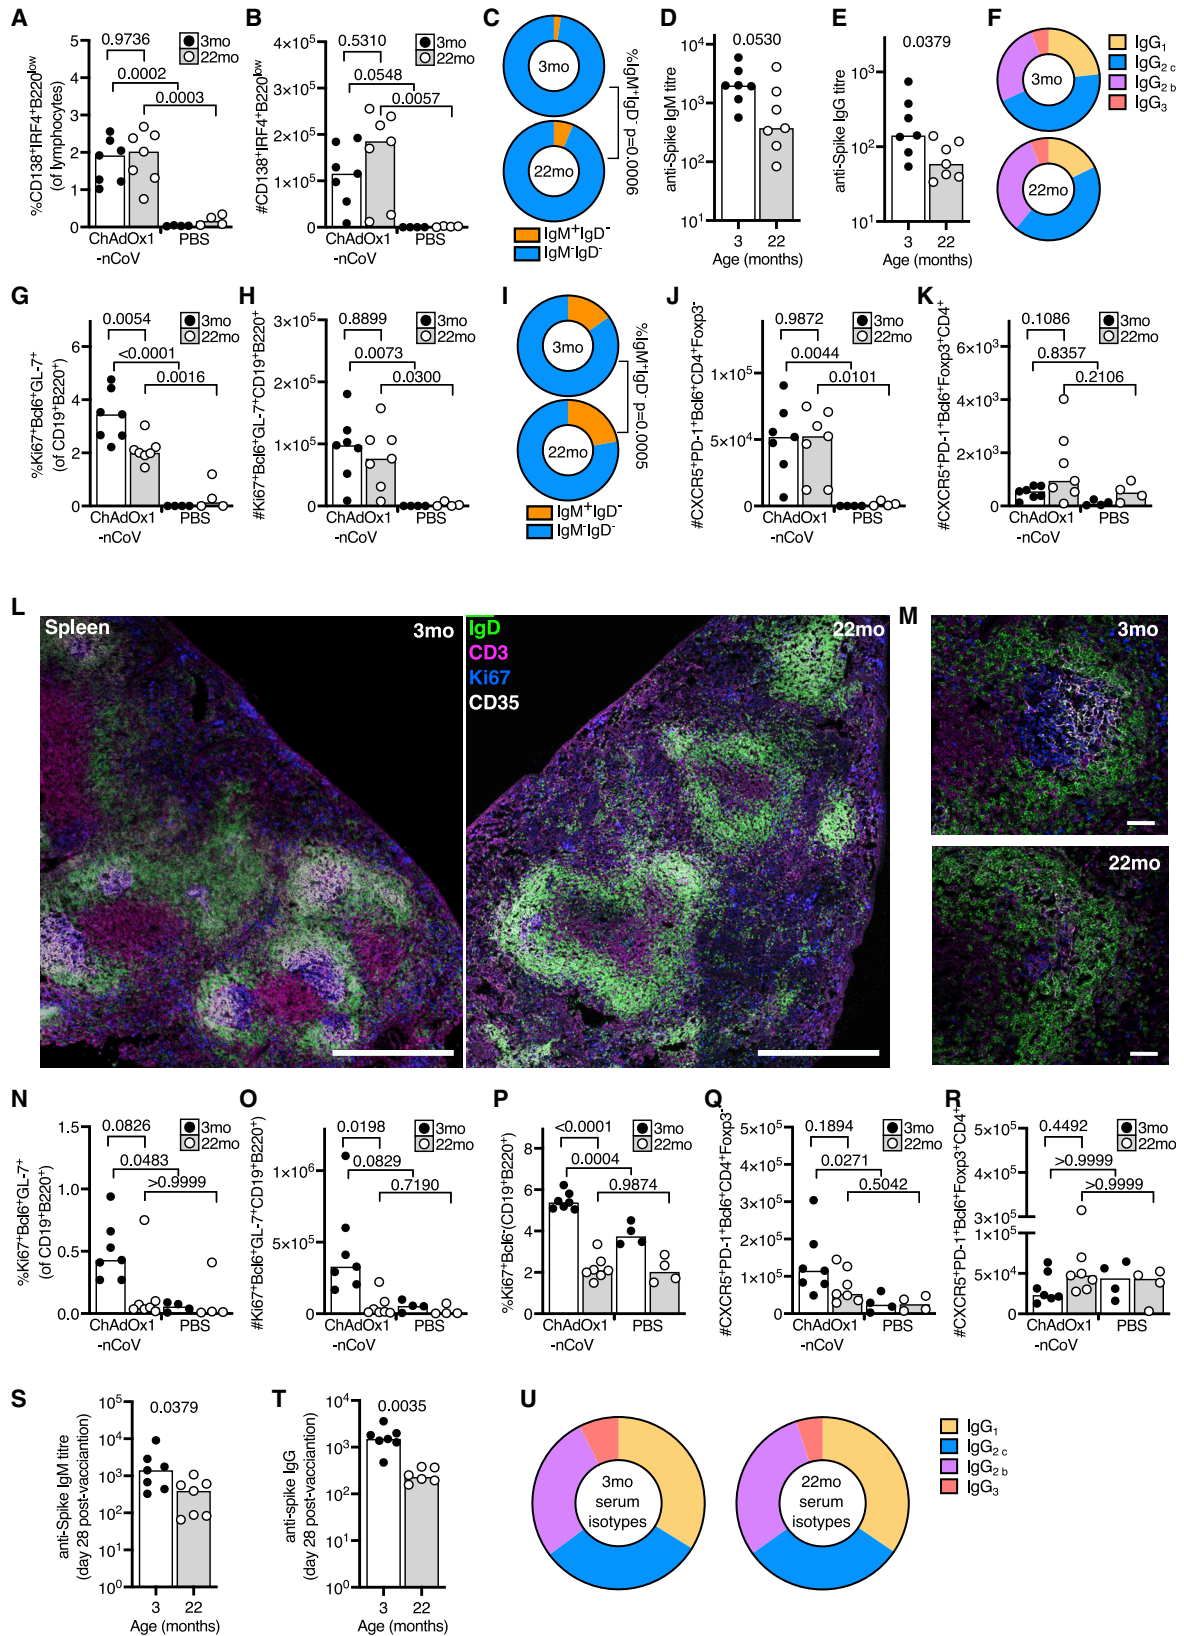

subclasses (Figure 6U). Together, these data indicate that, while a single dose of ChAdOx1 nCoV-19 can induce comparable extrafollicular plasma cell responses between younger adult and aged mice, the germinal center response is compromised with age.

### A second dose of ChAdOx1 nCoV-19 boosts humoral immunity in aged mice

To test whether a prime-boost strategy can enhance the B cell response in aged mice, a prime-boost approach was taken (Figure 7A). Nine days after boost, there were Ki67<sup>+</sup> non-germinal center B cells, plasma cells and germinal center B cells in the draining lymph nodes of aged mice (Figures 7B–7H). Notably, the magnitude of the germinal center response was larger in aged mice than in younger adult mice after boost (Figures 7F–7H), and this was associated with increased T follicular helper and T follicular regulatory cell numbers (Figures 7I and 7J). A germinal center response was not observed in the spleen of either adult or aged mice 9 days after booster immunization (Figure 7K). This demonstrates that a second dose of ChAdOx1 nCoV-19 can enhance the B cell response in aged mice. This improvement in the B cell response corresponded to an increase in anti-spike IgG, without skewing IgG subclasses, antibodies in every aged mouse that was given a booster immunization (Figures 7L–7O). The post-boost ratio of IgG<sub>2</sub>/IgG<sub>1</sub> was 3.7 (3.0) in younger adult and 2.6 (1.6) in aged mice (mean and standard deviation). The functional effect of the humoral immunity after both prime and boost immunizations was measured by SARS-CoV-2 pseudotyped virus microneutralization assay. Nine days after prime immunization, SARS-CoV-2 neutralizing antibodies were at a lower titer in aged mice than measured in adult mice (Figure 7P). Nine days after boost, neutralizing antibodies were detectable in all aged mice and had been boosted 8-fold compared to post-prime, although the titer was lower than in younger adult mice (Figure 7P). The SARS-CoV-2 neutralizing antibody titer positively correlated with anti-spike IgG titer in aged mice, indicating that the main limitation in age-dependent humoral immunity is quantity, rather than function (Figure 7R). This demonstrates that a booster dose of ChAdOx1 nCoV-19 can improve anti-spike humoral immunity in older mice.

## DISCUSSION

The development of an effective anti-SARS-CoV-2 vaccine represents an opportunity to limit the health, social, and economic consequences of the current pandemic. Since

### Figure 6. Impaired B cell responses after ChAdOx1 nCoV-19 immunization of aged mice

(A and B) B cell response in 3-month-old (3mo) or 22-month-old (22mo) mice 9 days after immunization with ChAdOx1 nCoV-19 or PBS. Flow cytometric evaluation of the percentage (A) and number (B) of plasma cells in the iliac lymph node.

(C) Pie charts showing the proportion of IgM<sup>+</sup>IgD<sup>-</sup> (orange) and switched IgM<sup>-</sup>IgD<sup>-</sup> (blue) plasma cells from (A) and (B).

(D and E) Serum IgM (D) and IgG (E) anti-spike antibodies 9 days after immunization.

(F) Pie charts showing the proportion of anti-spike IgG of the indicated subclasses in the serum 9 days after immunization.

(G and H) Percentage (G) and number (H) of germinal center B cells in the iliac lymph node.

(I) Pie charts showing the proportion of IgM<sup>+</sup>IgD<sup>-</sup> (orange) and switched IgM<sup>-</sup>IgD<sup>-</sup> (blue) germinal center cells from (G) and (H).

(J–M) Number of T follicular helper (J) and T follicular regulatory (K) cells in the draining lymph node. Confocal images of the spleen of ChAdOx1 nCoV-19-immunized mice of the indicated ages; in (L), the scale bars represent 500 μm; in (M), the scale bars represent 50 μm. IgD<sup>+</sup> B cell follicle are in green, CD3<sup>+</sup> T cells in magenta, Ki67<sup>+</sup> cells in blue, and CD35<sup>+</sup> follicular dendritic cells in white.

(N and O) Percentage (N) and number (O) of splenic germinal center B cells.

(P) Percentage of Ki67<sup>+</sup> B cells in the spleen.

(Q and R) Number of splenic T follicular helper (Q) and T follicular regulatory (R) cells.

Serum IgM (S) and IgG (T) anti-spike antibodies and IgG subclasses (U) 28 days after immunization. For all bar graphs, the bar height corresponds to the median and each circle represents one biological replicate. The Shapiro-Wilk normality test was used to determine whether the data are consistent with a normal distribution, followed by either an ordinary one-way ANOVA test for data with a normal distribution or a Kruskal-Wallis test for non-normally distributed data alongside a multiple comparisons test, for ELISA data analyses were done on log transformed values. Data are representative of two independent experiments (n = 4–8 per group/experiment).

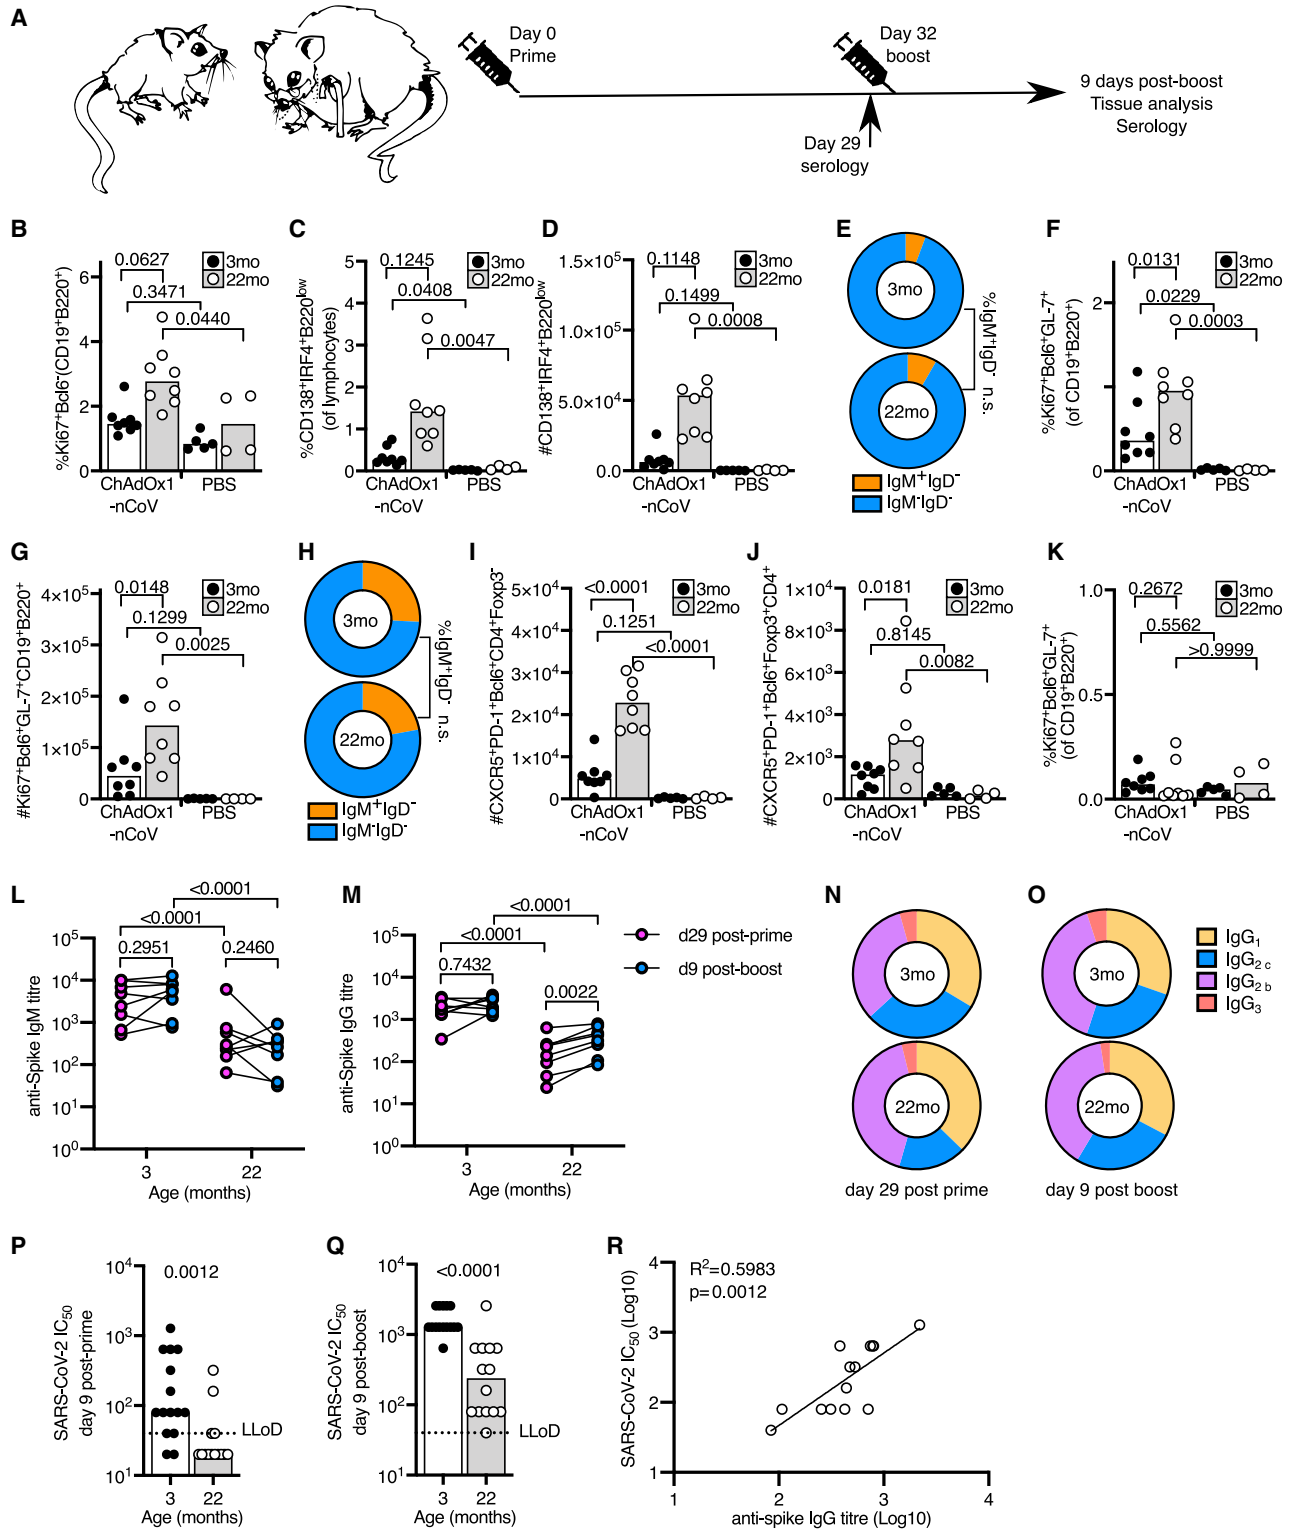

**Figure 7. A booster immunization enhances the B cell response to ChAdOx1 nCoV-19 immunization in aged mice**

(A) Scheme of the prime-boost immunization protocol.

(B) Percentage of Ki67<sup>+</sup> B cells in the draining lymph node.

(C and D) Percentage (C) and number (D) plasma cells in the iliac lymph node.



older adults are more likely to have severe health outcomes after infection, a vaccination strategy that provides protection for this group is particularly desirable. Here, we provide the most detailed immunophenotyping analysis to date of how the murine immune system following ChAdOx1 nCoV-19 vaccination. This vaccine stimulates both cellular and humoral immunity. Vaccination of younger adult mice triggers formation of spike-specific polyfunctional CD8<sup>+</sup> and Th1 cells that persist for at least 21 days after immunization. The first surge of antibodies come from short-lived plasma cells, that produce low levels of neutralizing antibodies. Germinal centers and T follicular helper cells are established later in the response, which contribute to longer term antibody titers. One dose of this vaccine stimulates an immune response in aged mice, but it is of reduced magnitude compared to that seen in younger adult animals. Importantly, the data presented here show that a second homologous immunization was able to enhance the B cell, helper T cell, and CD8<sup>+</sup> T cell response in aged mice. In people, the same prime-boost approach had an acceptable safety profile and enhanced humoral immunity,<sup>28</sup> indicating that this is a rational vaccination approach for use in the older members of our communities—arguably the sector of society most in need of an effective vaccine to prevent COVID-19.

Strategies that are able to enhance humoral immunity in older individuals are key to vaccine efficacy, particularly as in some respiratory infections, a higher titer of antibodies are required to be protective.<sup>35,36</sup> Antibody-secreting cells can form from two cellular pathways, but these are not equal in terms of quality or longevity. The extrafollicular response produces an initial burst of antibodies early after antigenic challenge. This response is short lived with no additional diversification of the B cell repertoire, and thus its contribution to long-term immunity is minimal.<sup>33</sup> The germinal center reaction is a specialized microenvironment that produces memory B cells and long-lived antibody secreting plasma cells with somatically mutated immunoglobulin (Ig) genes.<sup>34,37,38</sup> The germinal center is the only cellular source of long-lived plasma cells<sup>39</sup> and the only known site where the B cell response can be altered in response to antigen. Nine days after ChAdOx1 nCoV-19 immunization, the formation of plasma cells was comparable in young and aged mice, a time at which the majority of plasma cells derive from the extrafollicular response.<sup>39</sup> By contrast, the germinal center response was diminished in aged mice, which is a well-described deficit of the older immune system after vaccination.<sup>17,40</sup> This indicates that poor germinal center formation is the major barrier that must be overcome to improve humoral immunity in older individuals. A booster dose of ChAdOx1 nCoV-19 enhanced the magnitude of the germinal center response in aged mice, to a greater extent than it did in younger animals. This may be because younger mice have produced higher titers of anti-vaccine vector antibodies, which limits the action of a second dose.

(E) Pie charts showing the proportion of IgM<sup>+</sup>IgD<sup>-</sup> (orange) and switched IgM<sup>-</sup>IgD<sup>-</sup> (blue) plasma cells from (B) and (C).

(F and G) Percentage (F) and number (G) of germinal center B cells in the iliac lymph node.

(H) Pie charts showing the proportion of IgM<sup>+</sup>IgD<sup>-</sup> (orange) and switched IgM<sup>-</sup>IgD<sup>-</sup> (blue) germinal center cells from (F) and (G).

(I and J) Number of T follicular helper (I) and T follicular regulatory (J) cells in the draining lymph node.

(K) Percentage (K) of splenic germinal center B cells.

(L–O) Serum anti-spike IgM (L), IgG (M), and IgG subclasses (N and O) prior to boost (day 29) and 9 days after boost immunization.

(P and Q) SARS-CoV-2 neutralizing antibody titers in sera were determined by micro neutralization test, expressed as reciprocal serum dilution to inhibit pseudotyped virus entry by 50% (IC<sub>50</sub>). Samples below the lower limit of detection (LLoD) are shown as half of the LLoD.

(R) Linear regression of serum dilution to inhibit pseudotyped virus entry by 50% (IC<sub>50</sub> Log10) and serum anti-spike ELISA titer (Log10) in 22-month-old mice, 9 days post-boost. For all bar graphs, the bar height corresponds to the median and each circle represents one biological replicate. The Shapiro-Wilk normality test was used to determine whether the data are consistent with a normal distribution, followed by either an ordinary one-way ANOVA test for data with a normal distribution or a Kruskal-Wallis test for non-normally distributed data alongside a multiple comparisons test. For ELISA, data analyses were done on log transformed values. In (B)–(O), data are shown from one of two independent experiments (n = 4–8 per group/experiment); in (P)–(R), the data are pooled from two experiments.

Another feature of the aged germinal center reaction is reduced selection of high-affinity B cells, resulting in a diminished quality of the response in aging.<sup>19</sup> Whether the further diversification and affinity-based selection of the B cell receptor is important for protective humoral immunity to SARS-CoV-2 has yet to be established. However, antibodies isolated from spike-specific B cells from convalescent COVID-19 patients can be both potently neutralizing and have low levels of somatic hypermutation,<sup>41–43</sup> indicating that extensive somatic hypermutation is not required for anti-SARS-CoV-2-neutralizing antibody formation. Therefore, the main barrier to inducing protective humoral immunity to SARS-CoV-2 in older people may be an issue of enhancing the magnitude, rather than quality, of the germinal center response. Our study shows this can be achieved in aged mice by giving a second dose of the vaccine.

A rapid recall of memory CD8<sup>+</sup> T cells in response to viral infections complements the humoral response by promoting efficient pathogen clearance and this becomes particularly important in scenarios where the protective ability or magnitude of neutralizing antibodies is compromised.<sup>44</sup> A single dose of ChAdOx1 nCoV-19 vaccine induces a CD8<sup>+</sup> T cell response in both adult and aged mice. There was, however, a profound defect in the generation of spike-reactive CD8<sup>+</sup> T cells that produced granzyme B, a key cytotoxic effector molecule produced by effector CD8<sup>+</sup> T cells. This failure to generate granzyme B<sup>+</sup> CD8<sup>+</sup> T cells is a common feature in aging, previously observed in aged mice after West Nile Virus infection<sup>45</sup> and in aged monkeys infected with SARS-CoV.<sup>46</sup> A similar trend for fewer granzyme B<sup>+</sup> CD8<sup>+</sup> cells in older people was observed after influenza vaccination.<sup>47</sup> Consistent with reduced expression of granzyme B in T cells from older adults, T cells taken from older adults have an impaired ability to kill influenza infected cells *ex vivo*.<sup>48</sup> In a small study of older people, induction of granzyme B after influenza vaccination was a correlate of protection in older adults.<sup>36</sup> Here, we demonstrate that a second dose of ChAdOx1 nCoV-19 was able to correct the defective granzyme B<sup>+</sup> CD8<sup>+</sup> T cell response in aged mice, indicating that two doses of this vaccine is a better approach to enhance the cellular immune response in older bodies.

ChAdOx1 nCoV-19 is currently being trialed in older adults as part of a phase III trial, which will ultimately determine whether it is an effective vaccine for this demographic. Immunization of people over 55 years of age with adenovirus type-5(Ad5)-vectored COVID-19 vaccine resulted in lower antibody titers in the older age group, suggesting that adenoviral vectored vaccine strategies may require more than one dose in older people.<sup>49</sup> However, as pre-existing immunity to Ad5, a naturally occurring human tropic adenovirus, can inhibit the response to this vaccine, it is possible that the reduced immunogenicity of this vaccine is due to an increased prevalence of antibodies to the vaccine vector in this age group. By contrast, the presence of anti-ChAdOx1 antibodies in the general population is low.<sup>50</sup> The work presented here demonstrates that one dose of this vaccine is immunogenic in aged mice, but this response can be significantly improved with a second booster dose. Given that a second dose of ChAdOx1 nCoV-19 is immunogenic with expected reactogenicity profile in humans,<sup>28</sup> this may be a viable strategy to enhance immunogenicity and possibly efficacy in older people.

### Limitations of study

This study used aged mice as a pre-clinical model to test the immunogenicity of ChAdOx1 nCoV-19 in older bodies. One limitation of this study was that SARS-CoV-2

infections were not performed to test the protection conferred by vaccination. SARS-CoV-2 does not naturally infect mice; to circumvent this limitation, mouse adapted strains have been generated.<sup>51,52</sup> In order to bind to the mouse angiotensin-converting enzyme 2, SARS-CoV-2 requires amino acid substitutions in the receptor binding domain of the spike protein. As such, challenge with mouse adapted SARS-CoV-2 frequently mismatches vaccine encoded antigens and may not reflect real-world scenarios. The data presented in this manuscript show that a second dose of ChAdOx1 nCoV-19 increases anti-spike IgG titer and SARS-CoV-2 pseudovirus neutralizing antibody titer in aged mice, both of which are correlates of protection against SARS-CoV-2 infection in species that are susceptible to the wild-type virus.<sup>53,54</sup>

## STAR★METHODS

Detailed methods are provided in the online version of this paper and include the following:

- **KEY RESOURCES TABLE**
- **RESOURCE AVAILABILITY**
  - Lead Contact
  - Materials availability
  - Data and code availability
- **EXPERIMENTAL MODEL AND SUBJECT DETAIL**
  - Mouse housing and husbandry
- **METHODS DETAILS**
  - Immunisation and tissue sampling
  - Flow cytometry
  - Confocal imaging
  - Enzyme-linked immunosorbent assay (ELISA)
  - Micro neutralisation test using lentiviral-based pseudotypes bearing the SARS-CoV-2 Spike
- **QUANTIFICATION AND STATISTICAL ANALYSIS**

## SUPPLEMENTAL INFORMATION

Supplemental Information can be found online at <https://doi.org/10.1016/j.medj.2020.12.006>.

## ACKNOWLEDGMENTS

We are grateful to Dr. Martin Turner, Dr. Geoff Butcher, Marc Wiltshire, Paul Symonds, and Prof. Michael Wakelam for their support. We thank Dr. Hayley Sharpe and Dr. Heidi Welch for technical assistance. This study was supported by funding from the Biotechnology and Biological Sciences Research Council (BBS/E/B/000C0427, BBS/E/B/000C0428, and the Campus Capability Core Grant to the Babraham Institute), the Lister Institute of Preventative Medicine, the EPSRC VaxHub (EP/RO13756/1), and Innovate UK (biEBOV: 971615). T.L. and S.C.G. are Jenner Investigators. M.A.L. is an EMBO Young Investigator and a Lister Institute Prize Fellow. J.L.L. is supported by a National Science Scholarship (PhD) by the Agency for Science, Technology and Research, Singapore.

## AUTHOR CONTRIBUTIONS

Conceptualization, M.A.L. and T.L.; Methodology, A.S.-C., W.S.F., S.I., O.T.B., A.J.S., S.B.-R., D.W., J.B., D.B., S.F.-B., M.A.L., N.T., C.C., N.E.-B., and C.N.; Investigation, A.S.-C., W.S.F., S.I., O.T.B., S.F.-B., A.J.S., N.T., C.C., S.B.-R., J.L.L., and M.A.L.; Writing – Original Draft Preparation, M.A.L., A.S.-C., W.S.F., J.L.L., and T.L.; Writing – Review and Editing, all authors; Project Administration, S.I., M.A.L., and T.L.; Funding Acquisition, M.A.L., S.C.G., and T.L.

## DECLARATION OF INTERESTS

S.C.G. and T.L. are named on a patent application covering ChAdOx1 nCoV-19. The remaining authors declare no competing interests. The funders played no role in the conceptualization, design, data collection, analysis, decision to publish, or preparation of the manuscript.

Received: November 4, 2020

Revised: November 20, 2020

Accepted: December 2, 2020

Published: December 16, 2020

## REFERENCES

- Zhu, N., Zhang, D., Wang, W., Li, X., Yang, B., Song, J., Zhao, X., Huang, B., Shi, W., Lu, R., et al.; China Novel Coronavirus Investigating and Research Team (2020). A Novel Coronavirus from Patients with Pneumonia in China, 2019. *N. Engl. J. Med.* **382**, 727–733.
- Wu, F., Zhao, S., Yu, B., Chen, Y.M., Wang, W., Song, Z.G., Hu, Y., Tao, Z.W., Tian, J.H., Pei, Y.Y., et al. (2020). A new coronavirus associated with human respiratory disease in China. *Nature* **579**, 265–269.
- Hoffmann, M., Kleine-Weber, H., Schroeder, S., Kruger, N., Herrler, T., Erichsen, S., Schiergens, T.S., Herrler, G., Wu, N.H., Nitsche, A., et al. (2020). SARS-CoV-2 Cell Entry Depends on ACE2 and TMPRSS2 and Is Blocked by a Clinically Proven Protease Inhibitor. *Cell* **181**, 271–280.
- Wu, Z., and McGoogan, J.M. (2020). Characteristics of and Important Lessons From the Coronavirus Disease 2019 (COVID-19) Outbreak in China: Summary of a Report of 72314 Cases From the Chinese Center for Disease Control and Prevention. *JAMA* **323**, 1239–1242.
- Wu, C., Chen, X., Cai, Y., Xia, J., Zhou, X., Xu, S., Huang, H., Zhang, L., Zhou, X., Du, C., et al. (2020). Risk Factors Associated with Acute Respiratory Distress Syndrome and Death in Patients With Coronavirus Disease 2019 Pneumonia in Wuhan, China. *JAMA Intern Med* **180**, 934–943.
- Grasselli, G., Zangrillo, A., Zanella, A., Antonelli, M., Cabrini, L., Castelli, A., Cereda, D., Coluccello, A., Foti, G., Fumagalli, R., et al. (2020). Baseline Characteristics and Outcomes of 1591 Patients Infected With SARS-CoV-2 Admitted to ICUs of the Lombardy Region. *JAMA* **323**, 1574–1581.
- Lurie, N., Saville, M., Hatchett, R., and Halton, J. (2020). Developing Covid-19 Vaccines at Pandemic Speed. *N. Engl. J. Med.* **382**, 1969–1973.
- Sharpe, H.R., Gilbride, C., Allen, E., Belij-Rammerstorfer, S., Bissett, C., Ewer, K., and Lambe, T. (2020). The early landscape of coronavirus disease 2019 vaccine development in the UK and rest of the world. *Immunology* **160**, 223–232.
- Govaert, T.M., Thijs, C.T., Masurel, N., Sprenger, M.J., Dinant, G.J., and Knottnerus, J.A. (1994). The efficacy of influenza vaccination in elderly individuals. A randomized double-blind placebo-controlled trial. *JAMA* **272**, 1661–1665.
- Ortqvist, A., Hedlund, J., Burman, L.A., Elbel, E., Höfer, M., Leinonen, M., Lindblad, I., Sundelöf, B., and Kalin, M.; Swedish Pneumococcal Vaccination Study Group (1998). Randomised trial of 23-valent pneumococcal capsular polysaccharide vaccine in prevention of pneumonia in middle-aged and elderly people. *Lancet* **351**, 399–403.
- Stiasny, K., Aberle, J.H., Keller, M., Grubeck-Loebenstein, B., and Heinz, F.X. (2012). Age affects quantity but not quality of antibody responses after vaccination with an inactivated flavivirus vaccine against tick-borne encephalitis. *PLoS ONE* **7**, e34145.
- Burns, E.A., Lum, L.G., L’Hommedieu, G., and Goodwin, J.S. (1993). Specific humoral immunity in the elderly: in vivo and in vitro response to vaccination. *J. Gerontol.* **48**, B231–B236.
- Vanhooren, V., and Libert, C. (2013). The mouse as a model organism in aging research: usefulness, pitfalls and possibilities. *Ageing Res. Rev.* **12**, 8–21.
- Goronzy, J.J., and Weyand, C.M. (2019). Mechanisms underlying T cell ageing. *Nat. Rev. Immunol.* **19**, 573–583.
- Frasca, D., Blomberg, B.B., Garcia, D., Keilich, S.R., and Haynes, L. (2020). Age-related factors that affect B cell responses to vaccination in mice and humans. *Immunol. Rev.* **296**, 142–154.
- Gustafson, C.E., Kim, C., Weyand, C.M., and Goronzy, J.J. (2020). Influence of immune aging on vaccine responses. *J. Allergy Clin. Immunol.* **145**, 1309–1321.
- Stebegg, M., Bignon, A., Hill, D.L., Silva-Cayetano, A., Krueger, C., Vanderleyden, I., Innocenti, S., Boon, L., Wang, J., Zand, M.S., et al. (2020). Rejuvenating conventional dendritic cells and T follicular helper cell formation after vaccination. *eLife* **9**, e52473.
- Nakaya, H.I., Hagan, T., Duraisingham, S.S., Lee, E.K., Kwissa, M., Roupheal, N., Frasca, D., Gersten, M., Mehta, A.K., Gaujoux, R., et al. (2015). Systems Analysis of Immunity to Influenza Vaccination across Multiple Years and in Diverse Populations Reveals Shared Molecular Signatures. *Immunity* **43**, 1186–1198.
- Yang, X., Stedra, J., and Cerny, J. (1996). Relative contribution of T and B cells to hypermutation and selection of the antibody repertoire in germinal centers of aged mice. *J. Exp. Med.* **183**, 959–970.
- Lefebvre, J.S., Maue, A.C., Eaton, S.M., Lanthier, P.A., Tighe, M., and Haynes, L. (2012). The aged microenvironment contributes to the age-related functional defects of CD4 T cells in mice. *Aging Cell* **11**, 732–740.
- Praditsuan, R., Assantachai, P., Wasi, C., Puthavatana, P., and Kositanont, U. (2005). The efficacy and effectiveness of influenza vaccination among Thai elderly persons living in the community. *J. Med. Assoc. Thai.* **88**, 256–264.
- Baldwin, S.L., Hsu, F.C., Van Hoesen, N., Gage, E., Granger, B., Guderian, J.A., Larsen, S.E., Lorenzo, E.C., Haynes, L., Reed, S.G., and Coler, R.N. (2018). Improved Immune Responses in Young and Aged Mice with Adjuvanted Vaccines against H1N1 Influenza Infection. *Front. Immunol.* **9**, 295.
- Demicheli, V., Jefferson, T., Ferroni, E., Rivetti, A., and Di Pietrantonj, C. (2018). Vaccines for preventing influenza in healthy adults. *Cochrane Database Syst. Rev.* **2**, CD001269.
- Hung, I.F., Zhang, A.J., To, K.K., Chan, J.F., Li, C., Zhu, H.S., Li, P., Li, C., Chan, T.C., Cheng, V.C., et al. (2014). Immunogenicity of intradermal trivalent influenza vaccine with topical imiquimod: a double blind randomized controlled trial. *Clin. Infect. Dis.* **59**, 1246–1255.
- Hill, D.L., Pierson, W., Bolland, D.J., Mkindi, C., Carr, E.J., Wang, J., Houard, S., Wingett, S.W., Audran, R., Wallin, E.F., et al. (2019). The adjuvant GLA-SE promotes human Tfh cell expansion and emergence of public TCRβ clonotypes. *J. Exp. Med.* **216**, 1857–1873.
- van Doremalen, N., Lambe, T., Spencer, A., Belij-Rammerstorfer, S., Purushotham, J.N., Port, J.R., Avanzato, V.A., Bushmaker, T., Flaxman, A., Ulaszewska, M., et al. (2020). ChAdOx1 nCoV-19 vaccine prevents SARS-CoV-2 pneumonia in rhesus macaques. *Nature* **586**, 578–582.
- Graham, S.P., McLean, R.K., Spencer, A.J., Belij-Rammerstorfer, S., Wright, D., Ulaszewska, M., Edwards, J.C., Hayes, J.W.P., Martini, V., Thakur, N., et al. (2020). Evaluation of the immunogenicity of prime-boost vaccination with the replication-deficient viral vectored COVID-19 vaccine candidate ChAdOx1 nCoV-19. *NPJ Vaccines* **5**, 69.

28. Folegatti, P.M., Ewer, K.J., Aley, P.K., Angus, B., Becker, S., Belij-Rammerstorfer, S., Bellamy, D., Bibi, S., Bittaye, M., Clutterbuck, E.A., et al. (2020). Safety and immunogenicity of the ChAdOx1 nCoV-19 vaccine against SARS-CoV-2: a preliminary report of a phase 1/2, single-blind, randomised controlled trial. *Lancet* **396**, 467–478.
29. Manolova, V., Flace, A., Bauer, M., Schwarz, K., Saudan, P., and Bachmann, M.F. (2008). Nanoparticles target distinct dendritic cell populations according to their size. *Eur. J. Immunol.* **38**, 1404–1413.
30. Guillems, M., Dutertre, C.A., Scott, C.L., McGovern, N., Sichien, D., Chakarov, S., Van Gassen, S., Chen, J., Poidinger, M., De Prijck, S., et al. (2016). Unsupervised High-Dimensional Analysis Aligns Dendritic Cells across Tissues and Species. *Immunity* **45**, 669–684.
31. den Haan, J.M., Lehar, S.M., and Bevan, M.J. (2000). CD8(+) but not CD8(-) dendritic cells cross-prime cytotoxic T cells in vivo. *J. Exp. Med.* **192**, 1685–1696.
32. Mildner, A., and Jung, S. (2014). Development and function of dendritic cell subsets. *Immunity* **40**, 642–656.
33. MacLennan, I.C., Toellner, K.M., Cunningham, A.F., Serre, K., Sze, D.M., Zúñiga, E., Cook, M.C., and Vinuesa, C.G. (2003). Extrafollicular antibody responses. *Immunol. Rev.* **194**, 8–18.
34. Vinuesa, C.G., Linterman, M.A., Yu, D., and MacLennan, I.C. (2016). Follicular Helper T Cells. *Annu. Rev. Immunol.* **34**, 335–368.
35. Dunning, A.J., DiazGranados, C.A., Voloshen, T., Hu, B., Landolfi, V.A., and Talbot, H.K. (2016). Correlates of Protection against Influenza in the Elderly: Results from an Influenza Vaccine Efficacy Trial. *Clin. Vaccine Immunol.* **23**, 228–235.
36. McElhaney, J.E., Gravenstein, S., Upshaw, C.M., Hooton, J.W., Krause, P., Drinka, P., and Bleackley, R.C. (2001). Granzyme B: a marker of risk for influenza in institutionalized older adults. *Vaccine* **19**, 3744–3751.
37. Shlomchik, M.J., Luo, W., and Weisel, F. (2019). Linking signaling and selection in the germinal center. *Immunol. Rev.* **288**, 49–63.
38. Mesin, L., Ersching, J., and Victora, G.D. (2016). Germinal Center B Cell Dynamics. *Immunity* **45**, 471–482.
39. Weisel, F.J., Zuccarino-Catania, G.V., Chikina, M., and Shlomchik, M.J. (2016). A Temporal Switch in the Germinal Center Determines Differential Output of Memory B and Plasma Cells. *Immunity* **44**, 116–130.
40. Zheng, B., Han, S., Takahashi, Y., and Kelsoe, G. (1997). Immunosenescence and germinal center reaction. *Immunol. Rev.* **160**, 63–77.
41. Brouwer, P.J.M., Caniels, T.G., van der Straten, K., Snitselaar, J.L., Aldon, Y., Bangaru, S., Torres, J.L., Okba, N.M.A., Claireaux, M., Kerster, G., et al. (2020). Potent neutralizing antibodies from COVID-19 patients define multiple targets of vulnerability. *Science* **369**, 643–650.
42. Kreer, C., Zehner, M., Weber, T., Ercanoglu, M.S., Giesemann, L., Rohde, C., Halwe, S., Korenkov, M., Schommers, P., Vanshylla, K., et al. (2020). Longitudinal Isolation of Potent Near-Germline SARS-CoV-2-Neutralizing Antibodies from COVID-19 Patients. *Cell* **182**, 843–854.
43. Seydoux, E., Homad, L.J., MacCamy, A.J., Parks, K.R., Hurlburt, N.K., Jennewein, M.F., Akins, N.R., Stuart, A.B., Wan, Y.H., Feng, J., et al. (2020). Analysis of a SARS-CoV-2-Infected Individual Reveals Development of Potent Neutralizing Antibodies with Limited Somatic Mutation. *Immunity* **53**, 98–105.
44. Bassi, M.R., Kongsgaard, M., Steffensen, M.A., Fenger, C., Rasmussen, M., Skjødt, K., Finsen, B., Stryhn, A., Buus, S., Christensen, J.P., and Thomsen, A.R. (2015). CD8+ T cells complement antibodies in protecting against yellow fever virus. *J. Immunol.* **194**, 1141–1153.
45. Brien, J.D., Uhrlaub, J.L., Hirsch, A., Wiley, C.A., and Nikolich-Zugich, J. (2009). Key role of T cell defects in age-related vulnerability to West Nile virus. *J. Exp. Med.* **206**, 2735–2745.
46. Clay, C.C., Donart, N., Fomukong, N., Knight, J.B., Overheim, K., Tipper, J., Van Westrienen, J., Hahn, F., and Harrod, K.S. (2014). Severe acute respiratory syndrome-coronavirus infection in aged nonhuman primates is associated with modulated pulmonary and systemic immune responses. *Immun. Ageing* **11**, 4.
47. McElhaney, J.E., Xie, D., Hager, W.D., Barry, M.B., Wang, Y., Kleppinger, A., Ewen, C., Kane, K.P., and Bleackley, R.C. (2006). T cell responses are better correlates of vaccine protection in the elderly. *J. Immunol.* **176**, 6333–6339.
48. Powers, D.C., and Belshe, R.B. (1993). Effect of age on cytotoxic T lymphocyte memory as well as serum and local antibody responses elicited by inactivated influenza virus vaccine. *J. Infect. Dis.* **167**, 584–592.
49. Zhu, F.C., Guan, X.H., Li, Y.H., Huang, J.Y., Jiang, T., Hou, L.H., Li, J.X., Yang, B.F., Wang, L., Wang, W.J., et al. (2020). Immunogenicity and safety of a recombinant adenovirus type-5-vectored COVID-19 vaccine in healthy adults aged 18 years or older: a randomised, double-blind, placebo-controlled, phase 2 trial. *Lancet* **396**, 479–488.
50. Dicks, M.D., Spencer, A.J., Edwards, N.J., Wadell, G., Bojang, K., Gilbert, S.C., Hill, A.V., and Cottingham, M.G. (2012). A novel chimpanzee adenovirus vector with low human seroprevalence: improved systems for vector derivation and comparative immunogenicity. *PLoS ONE* **7**, e40385.
51. Gu, H., Chen, Q., Yang, G., He, L., Fan, H., Deng, Y.Q., Wang, Y., Teng, Y., Zhao, Z., Cui, Y., et al. (2020). Adaptation of SARS-CoV-2 in BALB/c mice for testing vaccine efficacy. *Science* **369**, 1603–1607.
52. Dinnon, K.H., 3rd, Leist, S.R., Schäfer, A., Edwards, C.E., Martinez, D.R., Montgomery, S.A., West, A., Yount, B.L., Jr., Hou, Y.J., Adams, L.E., et al. (2020). A mouse-adapted model of SARS-CoV-2 to test COVID-19 countermeasures. *Nature* **586**, 560–566.
53. Tostanoski, L.H., Wegmann, F., Martinot, A.J., Loos, C., McMahan, K., Mercado, N.B., Yu, J., Chan, C.N., Bondoc, S., Starke, C.E., et al. (2020). Ad26 vaccine protects against SARS-CoV-2 severe clinical disease in hamsters. *Nat. Med.* **26**, 1694–1700.
54. Yu, J., Tostanoski, L.H., Peter, L., Mercado, N.B., McMahan, K., Mahrokhan, S.H., Nkolola, J.P., Liu, J., Li, Z., Chandrashekar, A., et al. (2020). DNA vaccine protection against SARS-CoV-2 in rhesus macaques. *Science* **369**, 806–811.
55. Mähler Convenor, M., Berard, M., Feinstein, R., Gallagher, A., Illgen-Wilcke, B., Pritchett-Corning, K., and Raspa, M.; FELASA working group on revision of guidelines for health monitoring of rodents and rabbits (2014). FELASA recommendations for the health monitoring of mouse, rat, hamster, guinea pig and rabbit colonies in breeding and experimental units. *Lab. Anim.* **48**, 178–192.
56. Pasciuto, E., Burton, O.T., Roca, C.P., Lagou, V., Rajan, W.D., Theys, T., Mancuso, R., Tito, R.Y., Kouser, L., Callaerts-Vegh, Z., et al. (2020). Microglia Require CD4 T Cells to Complete the Fetal-to-Adult Transition. *Cell* **182**, 625–640.

STAR★METHODS

KEY RESOURCES TABLE

| REAGENT or RESOURCE                                                       | SOURCE                  | IDENTIFIER                                                          |
|---------------------------------------------------------------------------|-------------------------|---------------------------------------------------------------------|
| <b>Antibodies</b>                                                         |                         |                                                                     |
| 2.4G2 Fc Block                                                            | ATCC                    | ATCC® HB-197; RRID: CVCL_9148                                       |
| Alexa Fluor® 647 anti-mouse CD64                                          | BD                      | Cat #558539; RRID: AB_647120<br>Clone #X54-5/7.1                    |
| Alexa Fluor® 700 anti-mouse MHC-II                                        | eBioscience             | Cat #56-5321-82; RRID: AB_494009<br>Clone #M5/114.15.2              |
| APC eFluor780 anti-mouse CD11c                                            | eBioscience             | Cat #47-0114-82; RRID: AB_1548652<br>Clone #N418                    |
| Brilliant Violet 510 anti-mouse CD86                                      | BD                      | Cat #563077; RRID: AB_2737991<br>Clone #GL1                         |
| Brilliant Violet 605 anti-mouse CD24                                      | BioLegend               | Cat #101827; RRID: AB_2563464<br>Clone #M1/69                       |
| Brilliant Violet 650 anti-mouse XCR1                                      | BioLegend               | Cat #148220; RRID: AB_2566410<br>Clone #ZET                         |
| Brilliant Violet 785 anti-mouse/human CD45R/B220                          | BioLegend               | Cat #103246; RRID: AB_2563256<br>Clone #RA3-6B2                     |
| PerCP-eFluor 710 anti-mouse CD172a (SIRPa)                                | eBioscience             | Cat #46-1721-82; RRID: AB_10804639<br>Clone #P84                    |
| PE anti-mouse F4/80                                                       | BioLegend               | Cat #123110; RRID: AB_893486<br>Clone #BM8                          |
| PE-594 anti-mouse CD11b                                                   | BD                      | Cat #562287; RRID: AB_11154216<br>Clone #M1/70                      |
| PE-Cyanine7 anti-mouse CD40                                               | BioLegend               | Cat #124622; RRID: AB_10897812<br>Clone #3/23                       |
| BUV395 Hamster anti-mouse CD3                                             | BD                      | Cat #563565; RRID: AB_2738278<br>Clone #145-2C11                    |
| BUV395 Rat anti-mouse CD19                                                | BD                      | Cat #565965; RRID: AB_2739418<br>Clone #103                         |
| Brilliant Violet 785 anti-mouse CD138 (Syndecan-1) Antibody               | BioLegend               | Cat #142534; RRID: AB_2814047<br>Clone#281-2<br>Lot# B291924        |
| IgM Monoclonal Antibody                                                   | eBioscience             | Cat #14-5790-85; RRID: AB_467583<br>Clone#II/41<br>Lot#2213349      |
| InvitrogenAlexa Fluor 532 Antibody Labeling Kit                           | Thermofisher Scientific | Cat #A20182; RRID: AB_2736944<br>Lot#20063164                       |
| CD45R (B220) Monoclonal Antibody (RA3-6B2), PerCP-eFluor 710, eBioscience | Invitrogen              | Cat #46-0452-82; RRID: AB_10717389<br>Clone#RA3-6B2<br>Lot# 2065656 |
| BB790-P Hamster Anti-Mouse TCR β Chain                                    | BD                      | Cat #624296; RRID: AB_394679<br>Clone#H57-597<br>Lot# 8038906       |
| PE anti-mouse CD184 (CXCR4) Antibody                                      | BioLegend               | Cat #146506; RRID: AB_2562783<br>Clone#L276F12<br>Lot# B242855      |
| Alexa Fluor® 594 anti-T-bet Antibody                                      | BioLegend               | Cat #644834; RRID: AB_2728474<br>Clone#4B10<br>Lot# B305816         |
| Gata-3 Monoclonal Antibody (TWAJ), PE-eFluor 610, eBioscience             | Invitrogen              | Cat #61-9966-42; RRID: AB_2574686<br>Clone#TWAJ<br>Lot# 2050432     |

(Continued on next page)

**Continued**

| REAGENT or RESOURCE                                                                | SOURCE          | IDENTIFIER                                                            |
|------------------------------------------------------------------------------------|-----------------|-----------------------------------------------------------------------|
| CD69 Monoclonal Antibody (H1.2F3), PE-Cyanine5, eBioscience                        | Invitrogen      | Cat #15-0691-82; RRID: AB_468772<br>Clone#H1.2F3<br>Lot# 2161997      |
| FOXP3 Monoclonal Antibody (FJK-16 s), PE-Cyanine5.5, eBioscience                   | Invitrogen      | Cat #35-5773-82; RRID: AB_11218094<br>Clone#FJK-16 s<br>Lot# 2160553  |
| PE/Cyanine7 anti-mouse/human GL7 Antigen (T and B cell Activation Marker) Antibody | BioLegend       | Cat #144620; RRID: AB_2800677<br>Clone#GL7<br>Lot# B308239            |
| Bcl-6 Antibody, anti-human/mouse, REAfinity                                        | Miltenyi Biotec | Cat #130-121-997; RRID: AB_2801823<br>Clone#REA373<br>Lot# 5200701434 |
| Alexa Fluor® 700 anti-mouse Ki-67 Antibody                                         | BioLegend       | Cat #652420; RRID: AB_2564285<br>Clone#16A8<br>Lot# B279993           |
| Mouse IgG Isotype control                                                          | Invitrogen      | Cat #10400C; RRID: AB_2532980<br>Lot#286589                           |
| Rat IgG Isotype control                                                            | Invitrogen      | Cat #10700; RRID: AB_2610661<br>Lot#UD287160                          |
| CD16/CD32 Monoclonal Antibody (93), eBioscience                                    | Invitrogen      | Cat #14-0161-82; RRID: AB_467133<br>Clone#93<br>Lot#2083493           |
| BUV395 Rat Anti-Mouse IL-17A                                                       | BD              | Cat #565246; RRID: AB_2722575<br>Clone#TC11-18H10<br>Lot#8113640      |
| BUV496 Rat Anti-Mouse CD4                                                          | BD              | Cat #612952; RRID: AB_2813886<br>Clone#GK1.5<br>Lot#0080998           |
| BUV737 Rat Anti-Mouse IFN- $\gamma$                                                | BD              | Cat #612769; RRID: AB_2870098<br>Clone#XMG1.2<br>Lot#9205652          |
| Brilliant Violet 421 anti-mouse TNF- $\alpha$ Antibody                             | BioLegend       | Cat #506328; RRID: AB_2562902<br>Clone#MP6-XT22<br>Lot#B293819        |
| Granzyme B Monoclonal Antibody (NGZB), eFluor 450, eBioscience                     | eBioscience     | Cat #48-8898-82; RRID: AB_11149362<br>Clone#NGZB<br>Lot#E15759-103    |
| Brilliant Violet 570 anti-mouse CD3 Antibody                                       | BioLegend       | Cat #100225; RRID: AB_10900444<br>Clone#17A2<br>Lot#B301598           |
| Biotin anti-mouse CD154 Antibody                                                   | BioLegend       | Cat #106503; RRID: AB_313268<br>Clone#MR1<br>Lot#B297322              |
| Brilliant Violet 605 Streptavidin                                                  | BioLegend       | Cat #405229<br>Lot#B267737                                            |
| BV650 Rat Anti-Mouse IL-10                                                         | BD              | Cat #564083; RRID: AB_2738583<br>Clone#JES5-16E3<br>Lot#9161567       |
| Brilliant Violet 711 anti-mouse IL-4 Antibody                                      | BioLegend       | Cat #504133; RRID: AB_2565950<br>Clone#11B11                          |
| BV750 Rat Anti-CD11b                                                               | BD              | Cat #624380; RRID: AB_2871704<br>Clone#M1/70<br>Lot#8038933           |

(Continued on next page)

**Continued**

| REAGENT or RESOURCE                                                                 | SOURCE                  | IDENTIFIER                                                            |
|-------------------------------------------------------------------------------------|-------------------------|-----------------------------------------------------------------------|
| CD19 Monoclonal Antibody (eBio1D3 (1D3)), Super Bright 780, eBioscience             | Invitrogen              | Cat #78-0193-82; RRID: AB_2722936<br>Clone#eBio1D3<br>Lot#2200038     |
| IL-13 Monoclonal Antibody (eBio13A), Alexa Fluor 488, eBioscience                   | Invitrogen              | Cat # 53-7133-82; RRID: AB_2016708<br>Clone#eBio13A                   |
| IL-6 Monoclonal Antibody (MP5-20F3), PerCP-eFluor 710, eBioscience                  | Invitrogen              | Cat #46-7061-82; RRID: AB_2573829<br>Clone#MP5-20F3<br>Lot#E20156-102 |
| Perforin Rat anti-Mouse, PE, Clone: eBioOMAK-D, eBioscience                         | Invitrogen              | Cat #12-9392-82; RRID: AB_466243<br>Clone#eBioOMAK-D<br>Lot#1988475   |
| PE/Dazzle 594 anti-mouse IL-2 Antibody                                              | BioLegend               | Cat #503840; RRID: AB_2566724<br>Clone#JES6-5H4<br>Lot#B253794        |
| TCR gamma/delta Monoclonal Antibody (eBioGL3 (GL-3, GL3)), PE-Cyanine5, eBioscience | Invitrogen              | Cat # 15-5711-83; RRID: AB_468804<br>Clone#eBioGL3<br>Lot#1975736     |
| Purified anti-mouse NK-1.1 Antibody                                                 | BioLegend               | Cat #108702; RRID: AB_313389<br>Clone#PK136<br>Lot#B255763igd         |
| PE/Cy5.5® Conjugation Kit - Lightning-Link®                                         | Abcam                   | Cat #ab102899                                                         |
| PE-Vio770-pro-IL-1-beta                                                             | Miltenyi Biotec         | Cat#130-109-043; RRID: AB_2652405<br>Clone#<br>Lot#5180628359         |
| eFluor660-IL-21                                                                     | Invitrogen              | Cat #50-7211-82; RRID: AB_10596796<br>Clone#FFA21<br>Lot#1919532      |
| APC-Foxp3                                                                           | Invitrogen              | Cat # 17-5773-82; RRID: AB_469457<br>Clone#FJK-16 s<br>Lot#1984797    |
| APC-Foxp3                                                                           | Miltenyi Biotec         | Cat #130-111-601; RRID: AB_2651768<br>Clone#REA788<br>Lot#5191126192  |
| AF700-IL-5                                                                          | R&D Systems             | Cat #C405N-100UG; RRID: AB_2233882<br>Clone#TRFK5<br>Lot#1581417      |
| eBioscience Fixable Viability Dye eFluor 780                                        | Invitrogen              | Cat #65-0865-14<br>Lot#2143361                                        |
| Alexa Fluor® 647 rat anti-mouse IgD                                                 | BioLegend               | Cat #405708; RRID: AB_893528<br>Clone 11-26 c.2a                      |
| FITC rat anti-mouse Ki67                                                            | Invitrogen              | Cat #11-5698-82; RRID: AB_11151330<br>Clone SoIA15                    |
| Biotin rat anti-mouse CD21/35                                                       | Thermofisher Scientific | Cat #14-0211-81; RRID: AB_467154<br>Clone 8D9                         |
| Hamster anti-mouse CD3e                                                             | Thermofisher Scientific | Cat #14-0033-82; RRID: AB_837128<br>Clone500A2                        |
| AF568 goat anti-hamster IgG (H+L)                                                   | Thermofisher Scientific | Cat #A-21112; RRID: AB_2535761                                        |
| BV421 Streptavidin                                                                  | BioLegend               | Cat #405225                                                           |
| Goat Anti-Mouse IgG- Alkaline Phosphatase conjugate                                 | Sigma-Aldrich           | Cat #AP124A; RRID: AB_11212223<br>Lot# SLBK6489V                      |
| Goat Anti-Mouse IgM mu chain (Alkaline Phosphatase)                                 | Abcam                   | Cat #ab97227; RRID: AB_10688257<br>Lot#GR3304914-1                    |

(Continued on next page)



**Continued**

| REAGENT or RESOURCE                                                  | SOURCE           | IDENTIFIER                                         |
|----------------------------------------------------------------------|------------------|----------------------------------------------------|
| Goat Anti-Mouse IgA ( $\alpha$ -chain specific)–Alkaline Phosphatase | Sigma-Aldrich    | Cat #A4937; RRID: AB_258210                        |
| Goat anti-mouse IgG1–Alkaline Phosphatase                            | Southern Biotech | Cat #1071-04; RRID: AB_2794425<br>Lot# B5312-YH67C |
| Goat anti-mouse IgG2a–Alkaline Phosphatase                           | Southern Biotech | Cat #1081-04; RRID: AB_2794494<br>Lot# B4117-RC97F |
| Goat Anti-mouse IgG2b–Alkaline Phosphatase                           | Southern Biotech | Cat #1091-04; RRID: AB_2794541<br>Lot#J111-SG78    |
| Goat anti-mouse IgG2c–Alkaline Phosphatase                           | Southern Biotech | Cat #1078-04; RRID: AB_2794461<br>Lot#L3913-R776G  |
| Goat anti-mouse IgG3–Alkaline Phosphatase                            | Abcam            | Cat #ab98705; RRID: AB_10674160<br>Lot#GR3211361-1 |

**Bacterial and Virus Strains**

|                 |          |                                                     |
|-----------------|----------|-----------------------------------------------------|
| ChAdOx1 nCoV-19 | In house | Van Doremalan Nature volume 586, pages578–582(2020) |
|-----------------|----------|-----------------------------------------------------|

**Chemicals, Peptides, and Recombinant Proteins**

|                                                            |                          |                                                                 |
|------------------------------------------------------------|--------------------------|-----------------------------------------------------------------|
| Yellow-green fluorescent Carboxylate-modified microspheres | Invitrogen               | Cat#F8787                                                       |
| FoxP3/Transcription Factor Staining buffer                 | eBioscience              | Cat#00-5323-00                                                  |
| Permeabilisation buffer                                    | eBioscience              | Cat#00-8333-56                                                  |
| SARS-CoV-2 spike protein immunodominant domain peptides    | Miltenyi Biotec          | Cat#130-126-700                                                 |
| Phorbol 12,13 dibutyrate                                   | Tocris Bioscience        | Cat#4153/1                                                      |
| Ionomycin calcium salt                                     | Tocris Bioscience        | Cat# 1704/1                                                     |
| Brefeldin A                                                | Tocris Bioscience        | Cat# 1231/5                                                     |
| Collagenase D                                              | Roche                    | Cat#11088866001                                                 |
| Live/Dead fixable Blue Dead Cell Staining                  | Invitrogen               | Cat#L23105                                                      |
| Brilliant Stain buffer                                     | BD Bioscience            | Cat#563794; RRID: AB_2869750                                    |
| UltraComp eBeads                                           | Invitrogen               | Cat#01-2222-41                                                  |
| Paraformaldehyde                                           | Sigma-Aldrich            | Cat#P6148                                                       |
| L-Lysine                                                   | Sigma-Aldrich            | Cat#L5501                                                       |
| Na <sub>3</sub> PO <sub>4</sub>                            | Sigma-Aldrich            | Cat#342483                                                      |
| NaIO <sub>4</sub>                                          | Sigma-Aldrich            | Cat#210048                                                      |
| Sucrose                                                    | Sigma-Aldrich            | Cat#S0389                                                       |
| Optimum Cutting Temperature (OCT) medium                   | VWR                      | Cat#25608-930                                                   |
| DAPI                                                       | Invitrogen               | Cat#D1306                                                       |
| Triton X                                                   | Sigma-Aldrich            | Cat#X100                                                        |
| Hydromount mounting medium                                 | National Diagnostics     | Cat#HS-106                                                      |
| TRIzol reagent                                             | ThermoFisher Scientific  | Cat#15596026                                                    |
| PEI transfection reagent                                   | Sigma-Aldrich            | Cat# 408727                                                     |
| SARS-CoV-2 FL-S protein                                    | In house                 | Graham et al., npj Vaccines volume 5, Article number: 69 (2020) |
| Blocker Casein                                             | Thermo Fisher Scientific | Cat# 37528                                                      |
| p-Nitrophenyl Phosphate Substrate Buffer                   | Sigma-Aldrich            | Cat# 487664                                                     |
| BrightGlo luciferase reagent                               | Promega                  | Cat# E2650                                                      |
| TransIT X2 transfection reagent                            | Geneflow                 | Cat# E7-0178                                                    |

**Critical Commercial Assays**

|                              |                         |                                                               |
|------------------------------|-------------------------|---------------------------------------------------------------|
| BD cytofix/cytoperm          | BD                      | Cat#554722; RRID: AB_2869008                                  |
| TaqManRNA to Ct 1-step kit   | ThermoFisher Scientific | Cat#4392656                                                   |
| TaqMan gene expression assay | ThermoFisher Scientific | Mx1 Mm00487796_m1<br>Gbp2 Mm00494576_g1<br>Hprt Mm03024075_m1 |

**Experimental Models: Cell Lines**

|         |      |                                |
|---------|------|--------------------------------|
| HEK293T | ATCC | ATCC® CRL-3216; RRID:CVCL_0063 |
|---------|------|--------------------------------|

**Experimental Models: Organisms/Strains**

|                   |                    |                         |
|-------------------|--------------------|-------------------------|
| Mouse C57BL/6BabR | Babraham Institute | C57BL/6 <sup>BabR</sup> |
|-------------------|--------------------|-------------------------|

(Continued on next page)

| REAGENT or RESOURCE                                             | SOURCE                | IDENTIFIER                                                                                                                                                         |
|-----------------------------------------------------------------|-----------------------|--------------------------------------------------------------------------------------------------------------------------------------------------------------------|
| <b>Continued</b>                                                |                       |                                                                                                                                                                    |
| <b>Recombinant DNA</b>                                          |                       |                                                                                                                                                                    |
| SARS-CoV-2 Spike                                                | BioBasic              | Wuhan strain QHR63290.2                                                                                                                                            |
| pcDNA3.1                                                        | Invitrogen            | Cat# V79020                                                                                                                                                        |
| Human Angiotensin-converting enzyme 2 (ACE2) expression plasmid | Addgene               | Plasmid#1786; RRID:Addgene_1786                                                                                                                                    |
| <b>Software and Algorithms</b>                                  |                       |                                                                                                                                                                    |
| FlowJo                                                          | Treestar              | <a href="https://www.flowjo.com/">https://www.flowjo.com/</a> ; RRID: SCR_008520                                                                                   |
| Volocity                                                        | PerkinElmer           | <a href="https://www.perkinelmer.com/443/category/image-analysis-software">https://www.perkinelmer.com/443/category/image-analysis-software</a> ; RRID: SCR_002668 |
| Glomax-Multi detection system                                   | Promega               | TM297, Cat#E7081; RRID: SCR_015575                                                                                                                                 |
| GraphPad Prism                                                  | GraphPad              | <a href="https://www.graphpad.com/">https://www.graphpad.com/</a> ; RRID: SCR_002798                                                                               |
| CFX Manager software                                            | BioRad                | CFX Manager Software #1845000; RRID: SCR_017251                                                                                                                    |
| SOFTmax PRO                                                     | Molecular Devices     | <a href="https://www.moleculardevices.com/products/microplate-readers/">https://www.moleculardevices.com/products/microplate-readers/</a> ; RRID: SCR_014240       |
| R                                                               |                       | <a href="https://www.r-project.org/">https://www.r-project.org/</a> ; RRID: SCR_001905                                                                             |
| <b>Other</b>                                                    |                       |                                                                                                                                                                    |
| Breeder and Grower CRM(P)VP diet                                | Special diet services | Cat# 801722                                                                                                                                                        |

## RESOURCE AVAILABILITY

### Lead Contact

Further information and requests for resources and reagents should be directed to and will be fulfilled by the Lead Contact, Michelle Linterman ([michelle.linterman@babraham.ac.uk](mailto:michelle.linterman@babraham.ac.uk)).

### Materials availability

This project did not generate new unique reagents.

### Data and code availability

This project did not generate any new code or novel datasets.

## EXPERIMENTAL MODEL AND SUBJECT DETAIL

### Mouse housing and husbandry

C57BL/6BabR mice were bred, aged and maintained in the Babraham Institute Biological Support Unit. No primary pathogens or additional agents listed in the Federation of European Laboratory Animal Science Association recommendations<sup>55</sup> were detected during health monitoring surveys of the stock holding rooms. Ambient temperature was ~19–21°C and relative humidity 52%. Lighting was provided on a 12 hr light: 12 hr dark cycle including 15 min 'dawn' and 'dusk' periods of subdued lighting. After weaning, mice were transferred to individually ventilated cages with 1–5 mice per cage. Mice were fed Mouse Breeder and Grower CRM (P) VP diet (Special Diet Services) *ad libitum* and received seeds (e.g., sunflower, millet) at the time of cage-cleaning as part of their environmental enrichment. All mouse experimentation was approved by the Babraham Institute Animal Welfare and Ethical Review Body. Animal husbandry and experimentation complied with existing European Union and United Kingdom Home Office legislation and local standards (PPL: P4D4AF812). Young mice were 10–12 weeks old, and aged mice 93–96 weeks old when experiments were started. Mice that had tumors, which can occur in aged mice, were excluded from the analysis.

## METHODS DETAILS

### Immunisation and tissue sampling

Mice were immunized in the right quadriceps femoris muscle with 50µL of either 1x10<sup>8</sup> infectious units of ChAdOx1 nCoV-19 in phosphate buffered saline (PBS)

alone, 50 $\mu$ L 0.02 $\mu$ m yellow-green fluorescent Carboxylate-Modified Microspheres (Invitrogen # F8787) in phosphate buffered saline (0.5% solids, final injected concentration). At the indicated time points post vaccination, blood, the right medial iliac lymph node, spleen and right quadriceps femoris muscle were taken for analysis.

### Flow cytometry

For T and B cell flow cytometric stains a single cell suspension was prepared from the iliac lymph node and half the spleen was generated by pressing the tissues through a 70  $\mu$ m mesh in 2% FBS in PBS. Cell numbers and viability were determined using a CASY TT Cell Counter (Roche).  $2 \times 10^6$  cells were transferred to 96-well plates for antibody staining. Samples were blocked with 100  $\mu$ L of 2.4G2 Fc Block (made in house) for 20 min at 4°C. Cells were then stained with surface antibody mix for 2hrs at 4°C and then were fixed with the eBiosciences Foxp3/Transcription Factor Staining Buffer (#00-5323-00) for 30 min at 4°C. Cells were then washed with 1x Permeabilisation buffer (eBioscience #00-8333-56) twice and stained with intracellular antibody mix in 1x Permeabilisation buffer at 4°C overnight. For cytokine staining, splenic cells were stimulated with a pool of SARS-CoV-2 spike protein immunodominant domain peptides, (Miltenyi Biotec #130-126-700) at a 0.6  $\mu$ M concentration (approx. 1 $\mu$ g/ml), while lymph node cells were stimulated with 0.5 $\mu$ g/ml of Phorbol 12,13 dibutyrate (PdBu, Tocris Bioscience, #), 0.75 $\mu$ g/ml of Ionomycin calcium salt (Tocris Bioscience, #), both in warm complete RPMI (10% FCS, 1% Pen/Strep, 1% glutamine, 1% sodium pyruvate, 1% MEM NAA, 1% HEPES and 55  $\mu$ M-2-mercaptoethanol) for 4hrs at 37°C, 5%CO<sub>2</sub>. Cytokine secretion was then blocked with 22 $\mu$ g/ml of Brefeldin A (Tocris Bioscience, #) in warm complete RPMI for 2hrs at 37°C, 5% CO<sub>2</sub>. The cells were then stained with surface antibody mix for 20 minutes at 4°C and were subsequently fixed with 2% formaldehyde for 30min at room temperature. After two wash steps with 1x Permeabilisation buffer (eBioscience #00-8333-56), the cells were stained with intracellular antibody mix in 1x Permeabilisation buffer, supplemented with 20% 2.4G2 Fc Block at 4°C overnight. Following overnight staining, samples were washed twice with 1x Permeabilisation buffer and once with 2% FBS in PBS and acquired on a Cytex™ Aurora. Cells for single color controls were prepared in the same manner as the fully stained samples. The antibodies used for surface and overnight staining are listed in the [Key Resources Table](#).

Manual gating of flow cytometry data was done using FlowJo v10 software (Tree Star). tSNE, FlowSOM and heatmap analysis were performed on iLN samples from day 7 post-vaccination using R (version 4.0.2) using code that has previously been described<sup>56</sup>. The antibodies used for surface staining are listed in [Key Resources Table](#).

### Confocal imaging

For imaging of germinal centers, half of the spleen was fixed in periodate-lysine-paraformaldehyde (PLP) containing 1% (v/v) PFA (Sigma #P6148), 0.075 M L-Lysine (Sigma #L5501), 0.37 M Na<sub>3</sub>PO<sub>4</sub> (pH 7.4) (Sigma #342483) and 0.01 M NaIO<sub>4</sub> (Sigma #210048), for 4 hr at 4°C. For imaging yellow-green fluorescent Carboxylate-Modified Microspheres (Invitrogen # F8787), lymph nodes and spleen were fixed in BD Cytofix/Cytoperm (BD Cat #554722), diluted 1 in 4 in PBS. After fixation, all tissues were dehydrated in 30% sucrose (Sigma #S0389) overnight, embedded in Optimum Cutting Temperature (OCT) medium (VWR #25608-930) on dry ice and stored at -80°C. The frozen tissues were cut into 10  $\mu$ m sections using a cryostat (Leica Biosystems) at -20°C and again stored at -80°C. For imaging yellow-green fluorescent carboxylate-codified microspheres, slides were first air-dried and then washed in PBS three times after which DAPI staining was performed (Invitrogen #D1306;

diluted 1:10 000 in PBS) for 10 minutes at room temperature protected from light. Slides were then washed three times with PBS and coverslips were mounted on the slides using Hydromount mounting medium (National Diagnostics #HS-106). For antibody stains, the slides were first air-dried and then hydrated in 0.5% Tween 20 in PBS (PBS-T). The slides were blocked in PBS containing 2% BSA and 10% goat serum for 2hrs, washed three times with PBS-T and then permeabilised with PBS containing 2% Triton X (Sigma #X100) for 45min. Following three wash steps with PBS-T, the slides were stained with primary antibody mix, which included AF647-conjugated rat anti-mouse IgD (clone 11-26 c.2a, Biolegend; 1:200), FITC-conjugated rat anti-mouse Ki67 (clone SolA15, Invitrogen; 1:100), rat anti-mouse biotin-conjugated CD21/35 (clone 8D9, ThermoFisher Scientific; 1:400) and hamster anti-mouse CD3ε (clone 500A2, ThermoFisher Scientific; 1:200), in PBS-T containing 1% BSA at 4°C overnight. The next day, slides were washed three times with PBS-T and incubated with secondary antibody mix, which included AF568-conjugated goat anti-hamster IgG (ThermoFisher, 1:1000) and BV421-conjugated Streptavidin (Biolegend, 1:1000), in PBS-T containing 2% goat serum for 2hr at room temperature. Slides were then washed three times with PBS-T, PBS and dH<sub>2</sub>O and coverslips were mounted using Hydromount mounting medium (National Diagnostics #HS-106). Images were acquired using a Zeiss 780 confocal microscope with 10x and 20x objectives and analyzed using ImageJ.

#### Enzyme-linked immunosorbent assay (ELISA)

Standardized ELISA was performed to detect SARS-CoV-2 FL-S protein – specific antibodies in sera. MaxiSorp plates (Nunc) were coated with 100 or 250 ng/well FL-S protein overnight at 4 °C for detection of IgG or IgM and IgA, respectively, prior to washing in PBS/Tween (0.05% v/v) and blocking with Blocker Casein in PBS (Thermo Fisher Scientific) for 1 h at room temperature (RT). Standard positive serum (pool of mouse serum with high endpoint titer against FL-S protein), individual mouse serum samples, negative and an internal control (diluted in casein) were incubated for 2 hours at room temperature for detection of specific IgG or 1h at 37°C for detection of specific IgM or IgA. Following washing, bound antibodies were detected by addition of alkaline phosphatase (AP)-conjugated goat anti-mouse IgG (Sigma-Aldrich) for 1h at room temperature or addition of AP-conjugated goat anti-mouse IgM or IgA (Abcam and Sigma-Aldrich, respectively) and addition of p-Nitrophenyl Phosphate, Disodium Salt substrate (Sigma-Aldrich). An arbitrary number of ELISA units were assigned to the reference pool and optical density values of each dilution were fitted to a 4-parameter logistic curve using SOFTmax PRO software. ELISA units were calculated for each sample using the optical density values of the sample and the parameters of the standard curve.

The IgG subclass ELISA were performed according to the protocol described for detection of specific IgM or IgA in the serum. In addition, all serum samples were diluted to 1 total IgG ELISA unit and then detected with anti-mouse IgG subclass-specific secondary antibodies (Southern Biotech or Abcam). The results of the IgG subclass ELISA are presented using optical density values instead of the ELISA units used for the total IgG ELISA. The ratio of IgG<sub>2b</sub>/IgG<sub>1</sub> was calculated for each animal as sum of optical density values (IgG<sub>2b</sub> + IgG<sub>2c</sub>) divided by the optical density value of IgG<sub>1</sub> and represented as mean values with standard deviation (SD).

#### Micro neutralisation test using lentiviral-based pseudotypes bearing the SARS-CoV-2 Spike

Lentiviral-based SARS-CoV-2 pseudotyped viruses were generated in HEK293T cells incubated at 37°C, 5% CO<sub>2</sub> as previously described<sup>27</sup>. Briefly, cells were seeded at a

density of  $7.5 \times 10^5$  in 6 well dishes, before being transfected with plasmids as follows: 500 ng of SARS-CoV-2 spike, 600 ng p8.91 (encoding for HIV-1 gag-pol), 600 ng CSFLW (lentivirus backbone expressing a firefly luciferase reporter gene), in Opti-MEM (GIBCO) along with 10  $\mu$ L PEI (1  $\mu$ g/mL) transfection reagent. A 'no glycoprotein' control was also set up using the pcDNA3.1 vector instead of the SARS-CoV-2 S expressing plasmid. The following day, the transfection mix was replaced with 3 mL DMEM (Dulbecco's Modified Eagle's medium) with 10% fetal bovine serum (DMEM-10%) and incubated for 48 and 72 hours, after which supernatants containing pseudotyped SARS-CoV-2 (SARS-CoV-2 pps) were harvested, pooled and centrifuged at 1,300  $\times$  g for 10 minutes at 4°C to remove cellular debris. Target HEK293T cells, previously transfected with 500 ng of a human Angiotensin-converting enzyme 2 (ACE2) expression plasmid (Addgene, Cambridge, MA, USA) were seeded at a density of  $2 \times 10^4$  in 100  $\mu$ L DMEM-10% in a white flat-bottomed 96-well plate one day prior to harvesting SARS-CoV-2 pps. The following day, SARS-CoV-2 pseudotyped viruses were titrated 10-fold on target cells, and the remainder stored at  $-80^\circ\text{C}$ . For micro neutralisation tests, mouse sera were diluted 1:20 in serum-free media and 50  $\mu$ L was added to a 96-well plate in triplicate and titrated 2-fold. A fixed titerd volume of SARS-CoV-2 pseudotyped viruses was added at a dilution equivalent to  $10^5$  signal luciferase units in 50  $\mu$ L DMEM-10% and incubated with sera for 1 hour at 37°C, 5% CO<sub>2</sub> (giving a final sera dilution of 1:40). Target cells expressing human ACE2 were then added at a density of  $2 \times 10^4$  in 100  $\mu$ L and incubated at 37°C, 5% CO<sub>2</sub> for 72 hours. Firefly luciferase activity was then measured with BrightGlo luciferase reagent and a Glomax-Multi<sup>+</sup> Detection System (Promega, Southampton, UK). Pseudovirus neutralization titers were expressed as the reciprocal of the serum dilution that inhibited luciferase expression by 50% (IC<sub>50</sub>).

## QUANTIFICATION AND STATISTICAL ANALYSIS

All experiments were performed either twice or three times with 3–8 mice per group. Data was first tested for Gaussian distribution using a Shapiro-Wilk test. Then data that was consistent with a normal distribution was analyzed with either a Student's t test for comparing two dataset, or one-way ANOVA test for data with multiple groups. If the data did not follow a normal distribution then a Mann-Whitney test was used for comparing two datasets and a Kruskal Wallis test for multiple comparisons. For ELISA data p values were generated on log transformed data. All p values shown are adjusted for multiple comparisons where multiple tests were performed on the same data. Analyses were performed within the Prism v8 software (GraphPad).

**Med, Volume 2**

**Supplemental information**

**A booster dose enhances  
immunogenicity of the COVID-19 vaccine  
candidate ChAdOx1 nCoV-19 in aged mice**

**Alyssa Silva-Cayetano, William S. Foster, Silvia Innocentin, Sandra Belij-Rammerstorfer, Alexandra J. Spencer, Oliver T. Burton, Sigrid Fra-Bidó, Jia Le Lee, Nazia Thakur, Carina Conceicao, Daniel Wright, Jordan Barrett, Nicola Evans-Bailey, Carly Noble, Dalan Bailey, Adrian Liston, Sarah C. Gilbert, Teresa Lambe, and Michelle A. Linterman**

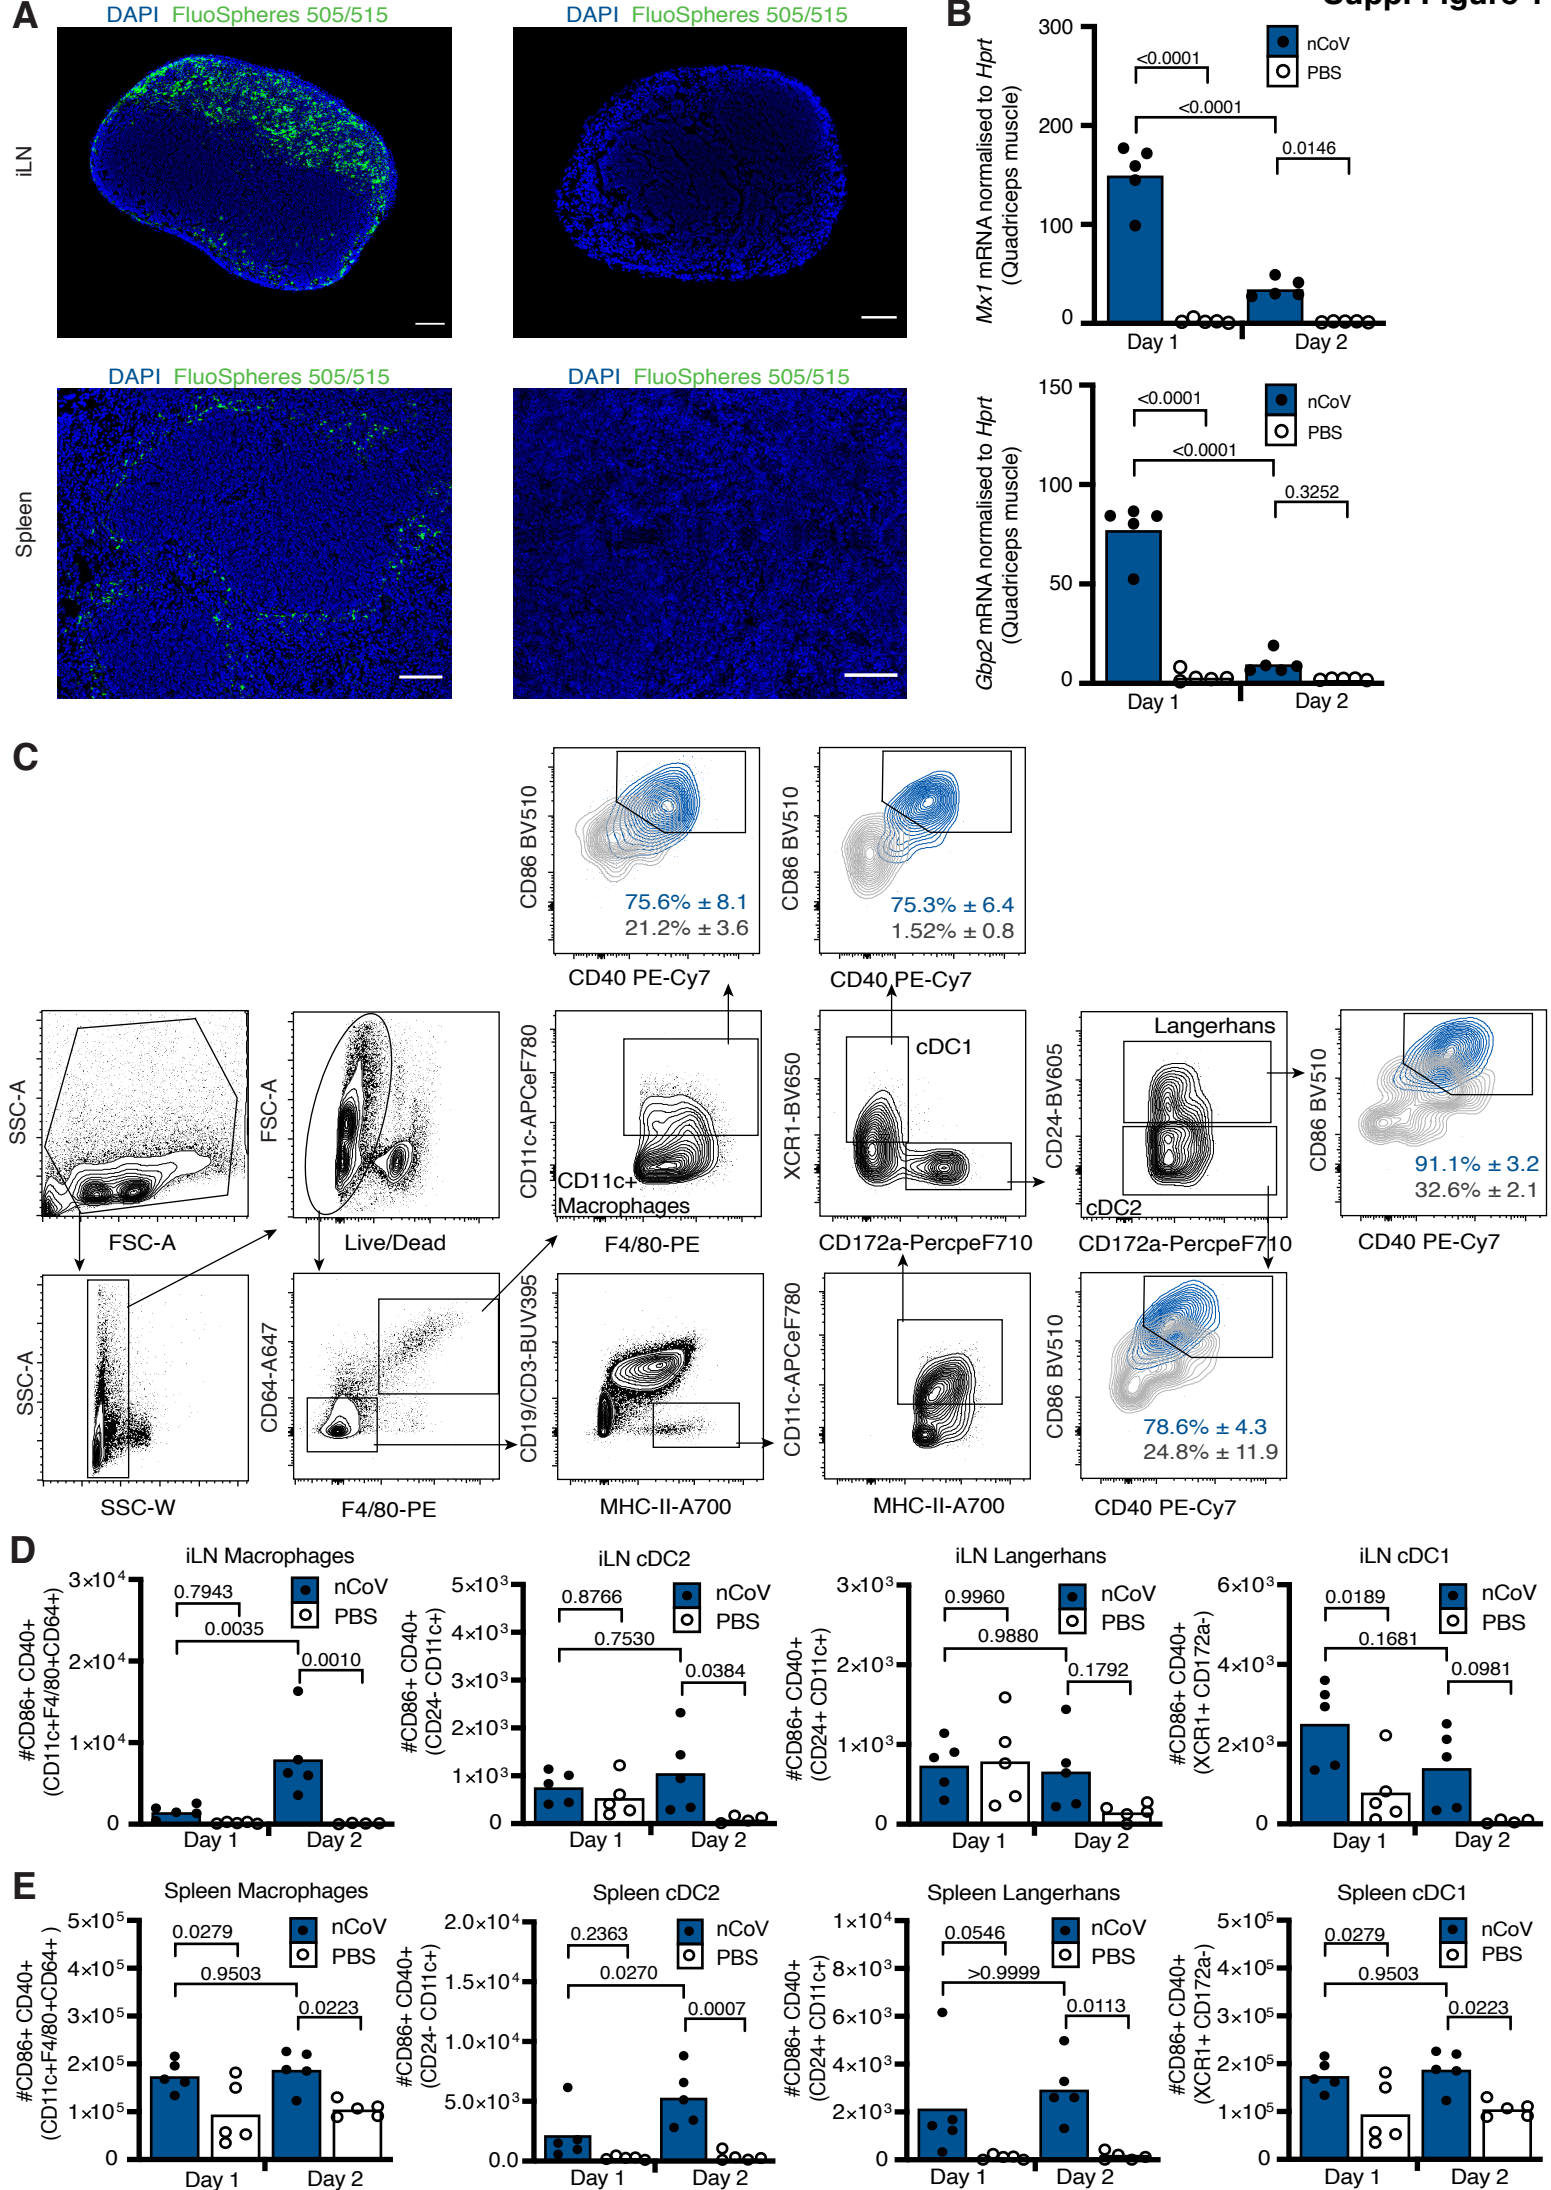

**Supplementary Figure 1. Intramuscular immunisation results in the activation of antigen presenting cells in the iLN and spleen upon immunisation with ChAdOx1 nCoV-19.** Related to figures 1-3. **A.** Representative immunofluorescence confocal images of DAPI expression and FluoSpheres™ (505/515) localisation in the iLN (top) and spleen (bottom) of mice immunised with yellow-green 20nm fluorescent FluoSpheres™ (left) or PBS (right) at 24hr post intramuscular immunisation. Scale bars, 100µM for both iLN and spleen. Data are representative of two independent experiments (n=2-5 per group/experiment). **B.** Expression of *Mx1* (top) and *Gbp2* (bottom) in the quadriceps muscle of mice immunised with ChAdOx1 nCoV or PBS at one- and two-days post immunisation, as determined by RT-qPCR. **c.** Gating strategy used for the identification of antigen presenting cell (APC) populations in the iLN and spleen of mice immunised with ChAdOx1 nCoV-19 or PBS at one- and two-days post immunisation. Macrophages were defined as CD11c<sup>+</sup>F4/80<sup>+</sup>CD64<sup>+</sup> cells. cDC1s were defined as XCR1<sup>+</sup>CD172a<sup>-</sup>CD11c<sup>+</sup>MHC-II<sup>+</sup>CD3/CD19<sup>-</sup>CD64<sup>-</sup>F4/80<sup>-</sup> cells. cDC2s CD24<sup>-</sup>CD172a<sup>+</sup>XCR1<sup>-</sup>CD11c<sup>+</sup>MHC-II<sup>+</sup>CD3/CD19<sup>-</sup>CD64<sup>-</sup>F4/80<sup>-</sup> cells. Langerhans cells were defined as CD24<sup>+</sup>CD11c<sup>+</sup>CD172a<sup>+</sup>XCR1<sup>-</sup>CD11c<sup>+</sup>MHC-II<sup>+</sup>CD3/CD19<sup>-</sup>CD64<sup>-</sup>F4/80<sup>-</sup> cells. Activated cells within each of these populations were identified as CD86<sup>+</sup>CD40<sup>+</sup>. These flow cytometry plots are representative of cells in the iLN of mice immunised with ChAdOx1 nCoV-19 (blue) or PBS (grey) at two-days post immunization, and indicate the median as a percentage as well as the standard deviation. **D-E.** Quantification of the absolute number of CD86<sup>+</sup>CD40<sup>+</sup> cells for each APC population in the iLN (**D**) and in the spleen (**E**). Bar height in **D-E** corresponds to the mean and each circle represents one biological replicate. P-values were determined using a Shapiro-Wilk normality test followed by either an ordinary one-way ANOVA test for data with a normal distribution or a Kruskal Wallis test for non-normally distributed data alongside a multiple comparisons test. Data are representative of two independent experiments (n=4-5 per group/experiment).



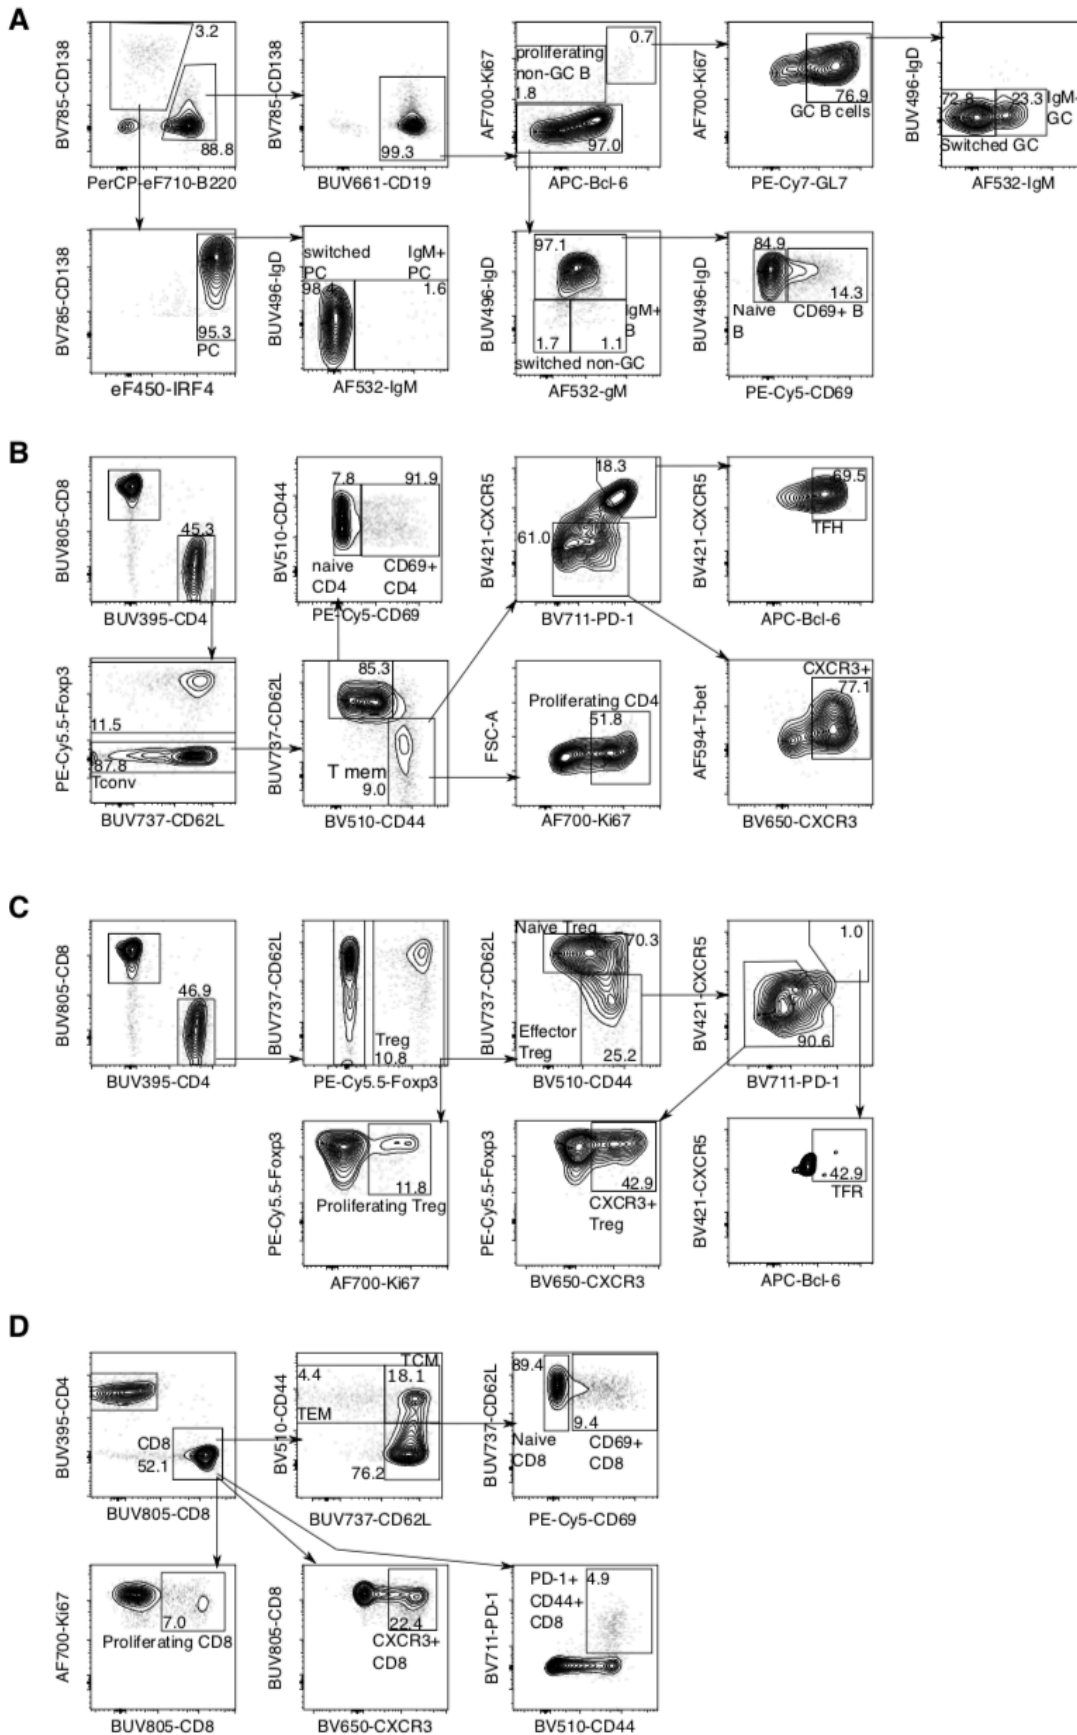

**Supplementary Figure 2. Gating strategy for ex vivo lymphocyte analyses.** Related to figures 1-3. Representative flow cytometric contour plots showing the gating strategy for B cell subsets (**A**), CD4<sup>+</sup>Foxp3<sup>-</sup> T cell subsets (**B**), Treg cell subsets (**C**) and CD8 cell subsets (**D**). Samples are taken from an iliac lymph node seven days after ChAdOx1 nCoV-19 immunisation.

**A Gating strategy**

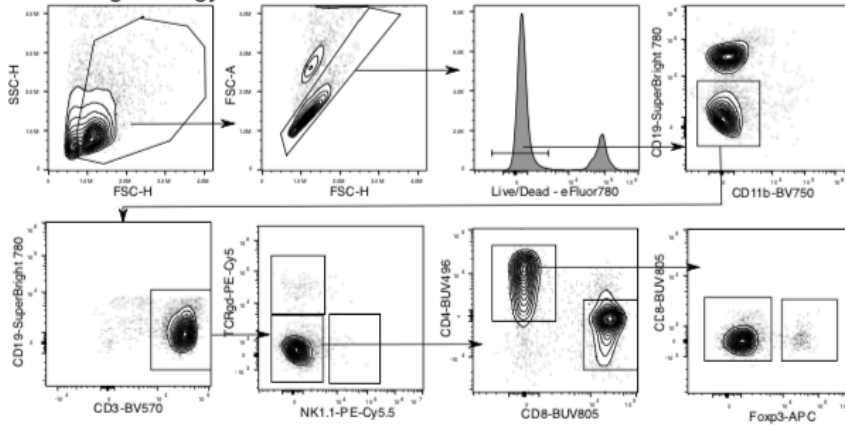

**B PdBu stimulated aortic lymph node cells**

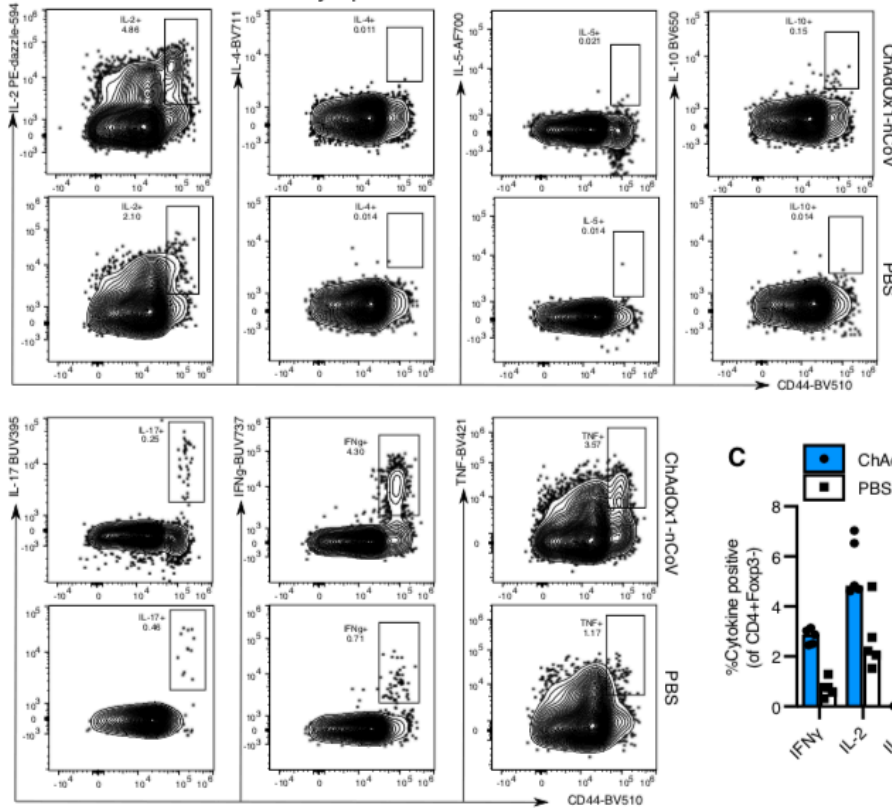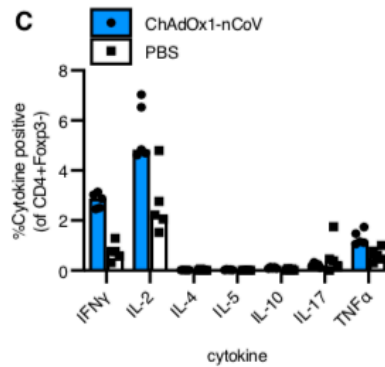

**D Spike peptide stimulated splenocytes**

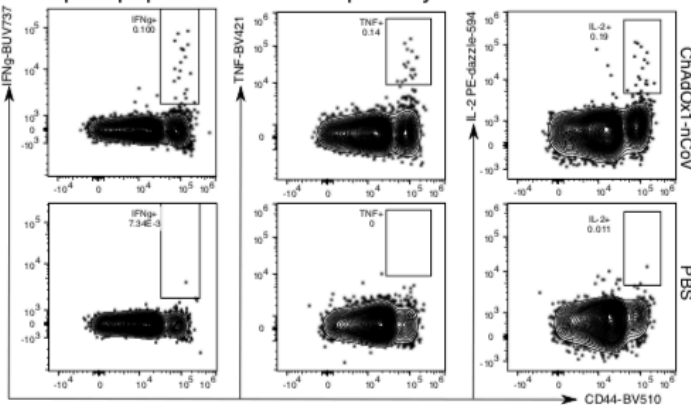

**Supplementary Figure 3. Gating strategy CD4 T cell cytokine staining.** Related to figures 2 and 5. Flow cytometric contour plots showing the gating strategy to identify T cell subsets (A), cytokine production in CD4<sup>+</sup>Foxp3<sup>-</sup> iliac lymph node T cells six hours after PdBu/Ionomycin restimulation (B, C), and in SARS-CoV-2 peptide restimulated CD4<sup>+</sup>Foxp3<sup>-</sup> splenocytes (D).

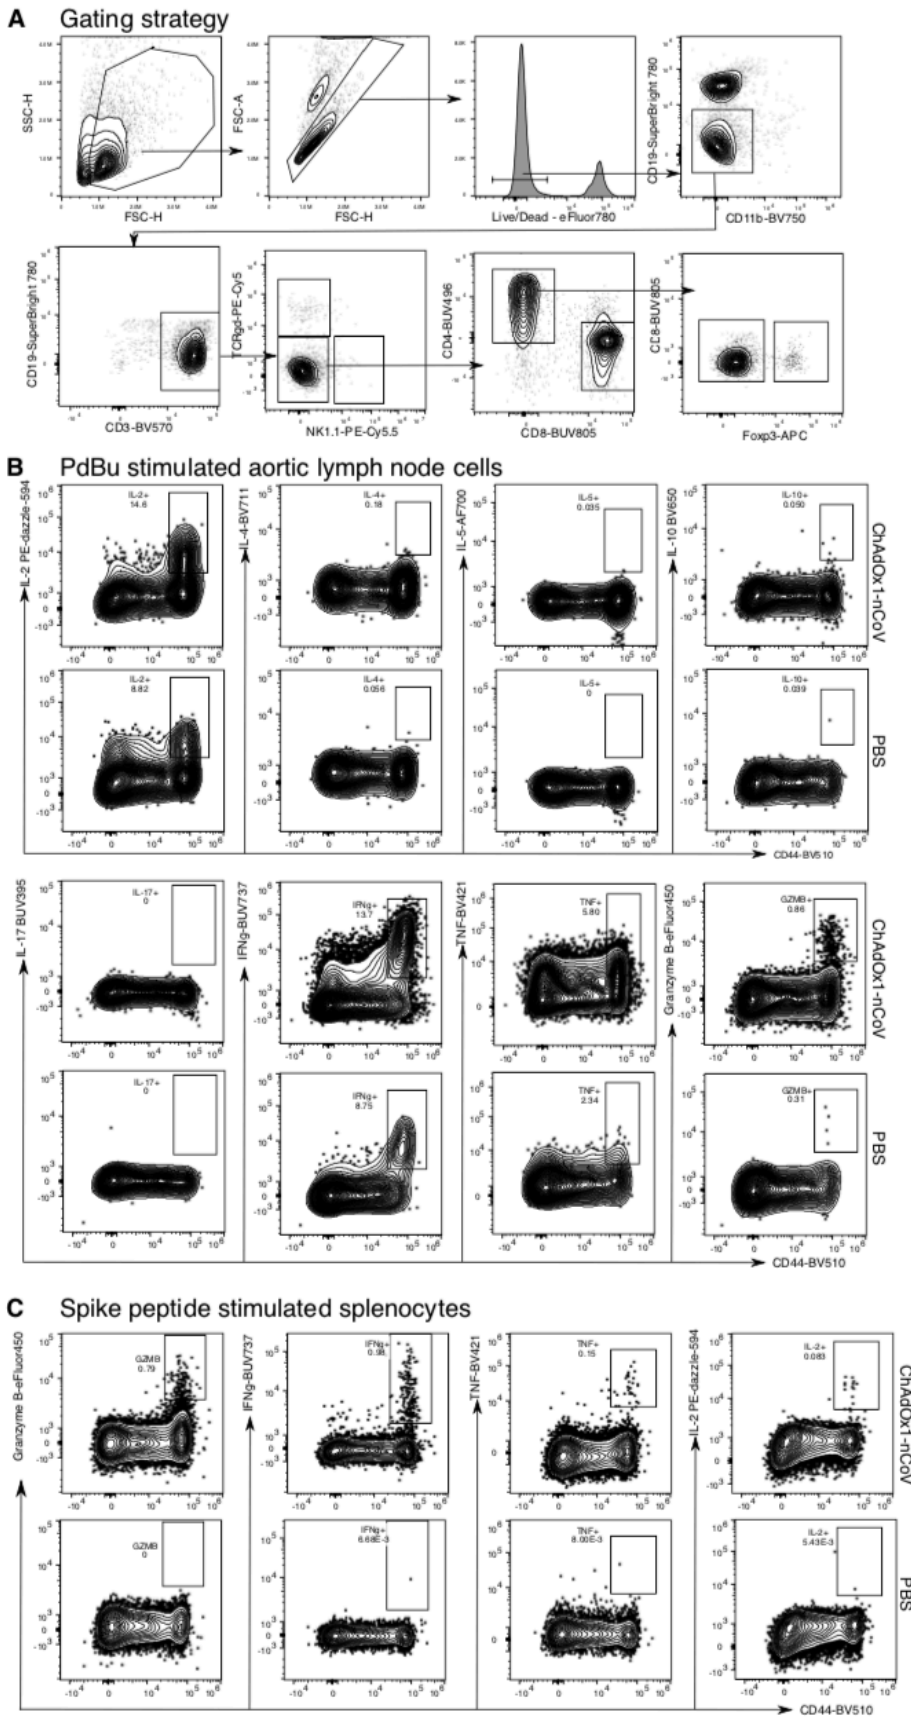

**Supplementary Figure 4. Gating strategy CD8 T cell cytokine and granzyme B staining.** Related to figures 3 and 4. Flow cytometric contour plots showing the gating strategy to identify T cell subsets (A), cytokine and granzyme B production in CD8<sup>+</sup> iliac lymph node T cells six hours after PdBu/Ionomycin restimulation (B), and in SARS-CoV-2 peptide restimulated CD8<sup>+</sup> splenocytes (C).

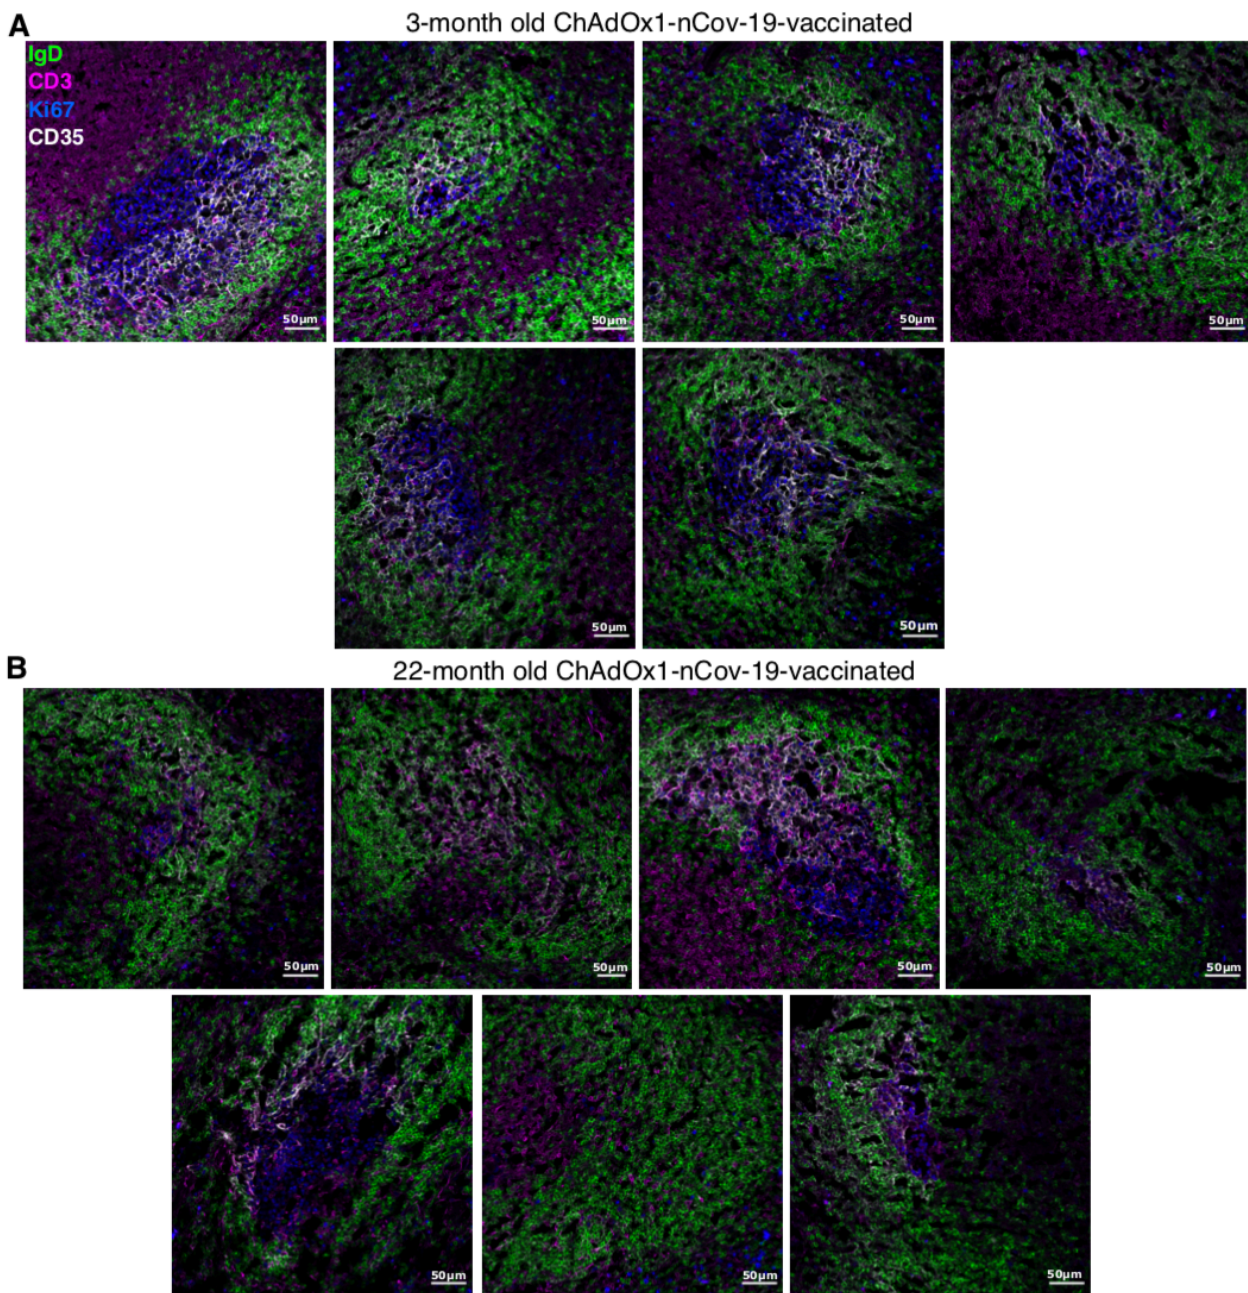

**Supplementary Figure 5. Germinal centre images nine days after ChAdOx1 nCoV-19 immunisation in adult and aged mice.** Related to figure 6.

Confocal images of the spleen of ChAdOx1 nCoV-19 immunised 3-month-old (**A**) and 22-month-old (**B**) mice. 10  $\mu$ m spleen sections were stained with anti-IgD (green), anti-CD3 (pink), anti-Ki67 (blue) and anti-CD35 (white) antibodies. Each image is from a different mouse. The scale bars indicate 50 $\mu$ m.

## Supplementary methods

Related to star methods and supplementary figure 1.

### **Flow cytometry of dendritic cells**

For dendritic cell analysis, secondary lymphoid tissues were harvested and incubated with 10 mg/ml Collagenase D (Roche #11088866001) in plain Roswell Park Memorial Institute (RPMI) (Gibco #11875093) for 30-45 min at 37 °C, followed by gentle pipetting to disrupt the tissue. Cells were washed with PBS containing 2% FBS, before cell numbers were determined using a CASY® TT Cell Counter (Roche).  $4 \times 10^6$  cells were transferred to 96-well plates for antibody staining. After a wash with PBS, cells were stained with Live/Dead Fixable Blue Dead Cell Stain (Invitrogen #L23105; diluted 1:1000 in PBS) on ice for 10min after which they were washed in 2% FBS in PBS and treated with unlabelled anti-CD16/32 (eBioscience #14-0161-82; diluted 1:100 in 2% FBS in PBS) for 20min at 4°C. Surface antibody staining was then performed for 1hr at 4°C in Brilliant Stain Buffer (BD Biosciences #563794). Samples were acquired on an LSRFortessa 5 with stained UltraComp eBeads Compensation Beads (Invitrogen #01-2222-41) as compensation controls.

### **RNA isolation and quantitative Real-Time PCR**

The right quadriceps muscle was dissected and weighed. The muscle tissue was snap frozen in liquid nitrogen and homogenized in 2mL TRIzol reagent (Thermo Fisher Scientific #15596026), then 1 mL of the homogenized muscle in TRIzol was processed following the manufacturer's instructions. RNA concentrations obtained from the RNA isolation were measured using the NanoDrop system (Thermo Fisher Scientific). Real time quantitative polymerase chain reaction (RT-qPCR) was performed using TaqMan Gene Expression Assays for *Mx1* (Mm 00487796\_m1), *Gbp2* (Mm 00494576\_g1) and *Hprt* (Mm 03024075\_m1) directly on RNA using Thermo Fisher Scientific's TaqMan RNA-to-CT 1-Step Kit (#4392656) following the manufacturer's protocol. All RT-qPCR reactions were assembled in 384-well plates (Bio-Rad #HSP3805), adding 10ng of template RNA per reaction to 8µl of a master mix containing the appropriate TaqMan Gene Expression Assay. All samples were run in triplicates on a BioRad CFX384 Real-Time System. The  $2^{-\Delta\Delta Ct}$ -method was applied for relative quantification of mRNA levels. Samples from PBS immunised mice were used as calibrators. Cq values were exported from the CFX Manager software (Bio-rad).
